# Supplementary material for: A retrospective cohort study identifying the principal pathological features useful in the diagnosis of inclusion body myositis
Source: PubMed Central journal article supplement — BMJ Open. 2014 Apr 26;4(4):e004552. doi: 10.1136/bmjopen-2013-004552 (PMC4010816; doi:10.1136/bmjopen-2013-004552), 2014-04-26
Supplement: bmjopen-2013-004552.draft_revisions.pdf [file bmjopen-2013-004552.draft_revisions.pdf]

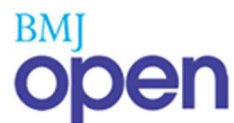

### Identification of principal pathological criteria for the diagnosis of inclusion body myositis

|                                 |                                                                                                                                                                                                                                                                                          |
|---------------------------------|------------------------------------------------------------------------------------------------------------------------------------------------------------------------------------------------------------------------------------------------------------------------------------------|
| Journal:                        | <i>BMJ Open</i>                                                                                                                                                                                                                                                                          |
| Manuscript ID:                  | bmjopen-2013-004552                                                                                                                                                                                                                                                                      |
| Article Type:                   | Research                                                                                                                                                                                                                                                                                 |
| Date Submitted by the Author:   | 25-Nov-2013                                                                                                                                                                                                                                                                              |
| Complete List of Authors:       | Brady, Stefen; MRC Centre for Neuromuscular Diseases, Division of Neuropathology<br>Squier, Waney<br>Sewry, Caroline<br>Hanna, Mike<br>Hilton-Jones, David<br>Holton, Janice; UCL Institute of Neurology, Department of Molecular Neuroscience and MRC Centre for Neuromuscular Diseases |
| <b>Primary Subject Heading</b>: | Neurology                                                                                                                                                                                                                                                                                |
| Secondary Subject Heading:      | Diagnostics                                                                                                                                                                                                                                                                              |
| Keywords:                       | NEUROLOGY, Adult neurology < NEUROLOGY, Neuromuscular disease < NEUROLOGY, Neuropathology < PATHOLOGY                                                                                                                                                                                    |
|                                 |                                                                                                                                                                                                                                                                                          |

SCHOLARONE™  
Manuscripts

**Identification of principal pathological criteria for the diagnosis of inclusion body myositis**

Corresponding author:

Dr Janice L Holton

Department of Molecular Neuroscience, UCL Institute of Neurology, Queen Square, London, UK.

janice.holton@ucl.ac.uk

Tel: 00 44 (0)20 3448 4239

Fax: 00 44 (0)20 3448 4486

Authors:

Stefen Brady<sup>1</sup>, Waney Squier<sup>2</sup>, Caroline Sewry<sup>3,4</sup>, Michael Hanna<sup>1</sup>, David Hilton-Jones<sup>5</sup>, Janice L Holton<sup>6</sup>

<sup>1</sup>MRC Centre for Neuromuscular Diseases, UCL Institute of Neurology and National Hospital for Neurology, Neurosurgery, Queen Square, London, UK.

<sup>2</sup>Department of Neuropathology, University of Oxford, John Radcliffe Hospital, Oxford, UK.

<sup>3</sup>Dubowitz Neuromuscular Centre, Institute of Child Health and Great Ormond Street Hospital for Children, London, UK.

<sup>4</sup>Wolfson Centre of Inherited Neuromuscular Diseases, RJA Orthopaedic Hospital, Oswestry, UK.

<sup>5</sup>Nuffield Department of Clinical Neurosciences (Clinical Neurology), University of Oxford, John Radcliffe Hospital, Oxford, UK.

<sup>6</sup>Department of Molecular Neuroscience, UCL Institute of Neurology, Queen Square, London, UK.

Keywords: Neurology, adult neurology, neuromuscular disease, neuropathology

Running title: Pathological criteria for inclusion body myositis

Word count: 2990

## ABSTRACT

### Objectives

The current pathological diagnostic criteria for sporadic inclusion body myositis (IBM) lack sensitivity. Using immunohistochemical techniques abnormal protein aggregates have been identified in IBM, including some associated with neurodegenerative disorders. Our objective was to investigate the diagnostic utility of a number of markers of protein aggregates together with mitochondrial and inflammatory changes in IBM.

### Design

Retrospective cohort study. The sensitivity of pathological features was evaluated in cases of Griggs' definite IBM. The diagnostic potential of the most reliable features was then assessed in clinically-typical IBM with rimmed vacuoles and clinically-typical IBM without rimmed vacuoles and IBM mimics - vacuolar myopathies and steroid-responsive inflammatory myopathies.

### Setting

Specialist muscle services at the John Radcliffe Hospital, Oxford and the National Hospital for Neurology and Neurosurgery, London.

### Results

Individual pathological features, in isolation, lacked sensitivity and specificity. However, the morphology and distribution of p62 aggregates in IBM were characteristic and in a myopathy with rimmed vacuoles, the combination of characteristic p62 aggregates and increased sarcolemmal and internal MHC Class I expression or endomysial cytotoxic T-cells were diagnostic for IBM (sensitivity 93% and specificity 100%). In an inflammatory myopathy lacking rimmed vacuoles, the presence of mitochondrial changes was 100% sensitive and 73% specific for IBM; characteristic p62 aggregates were specific, but lacked sensitivity.

### Conclusions

We propose an easily applied diagnostic algorithm for the pathological diagnosis of IBM. Additionally our findings support the hypothesis that many of the pathological features considered typical of IBM develop occur later in the disease, explaining their poor sensitivity at disease

1  
2  
3 presentation and emphasising the need for a revised pathological criteria to supplement the clinical  
4  
5 criteria in the diagnosis of IBM.  
6  
7

## 8 9 **STRENGTHS AND LIMITATIONS**

10  
11 The present study is a multicentre retrospective evaluation of the diagnostic utility of pathological  
12  
13 findings for differentiating IBM from myopathies important in the differential diagnosis – myopathies  
14  
15 containing rimmed vacuoles and steroid-responsive inflammatory myopathies.  
16  
17

18  
19 The main strength of our study was the systematic detailed analysis of well defined cases. This  
20  
21 enabled us to determine the sensitivity and specificity of individual pathological features and produce  
22  
23 an easily applied pathological diagnostic algorithm for IBM for use in clinical practice.  
24  
25

26  
27 Study limitations include the small number of cases and the retrospective design. Further prospective  
28  
29 studies are now required in larger cohorts of patients.  
30  
31

## 32 33 **INTRODUCTION**

34  
35 Sporadic inclusion body myositis (IBM) is the commonest acquired myopathy in those aged over 50  
36  
37 years.[1] Although classified as an idiopathic inflammatory myopathy, muscle biopsy reveals both  
38  
39 degenerative and inflammatory features. The widely used Griggs diagnostic criteria require the  
40  
41 presence of several pathological findings,[2] namely rimmed vacuoles, an inflammatory infiltrate with  
42  
43 invasion of non-necrotic fibres by mononuclear inflammatory cells (partial invasion), and either  
44  
45 amyloid deposits or 15-18 nm tubulofilaments identified by electron microscopy (EM). Although  
46  
47 these features in combination are highly specific for IBM, individually they occur in other  
48  
49 myopathies, including some important in the differential diagnosis for IBM.[3-7] Moreover, cases of  
50  
51 clinically-typical IBM have been reported where the combination of these pathological features is  
52  
53 absent causing diagnostic difficulty.[8-11]  
54  
55  
56  
57  
58  
59  
60

1  
2  
3 Over the last two decades, pathological accumulation of many different proteins has been reported in  
4 muscle fibres in IBM.[12] Proteins typically associated with neurodegenerative diseases such as  $\beta$ -  
5 amyloid ( $A\beta$ ), hyperphosphorylated tau and ubiquitin and newer neurodegenerative markers such as  
6 p62 and transactivation response DNA binding protein-43 (TDP-43) have been identified, as well as  
7 proteins associated with myofibrillar myopathies (MFM), including desmin and  $\alpha$ B-crystallin.  
8  
9 However, not all observations have been consistently reproduced.[13,14] Mitochondrial changes have  
10 also been proposed for inclusion in IBM diagnostic criteria,[15]. Clear guidelines for the  
11 incorporation of immunohistochemical findings and mitochondrial changes into diagnostic criteria for  
12 IBM have not been established.[16]

13  
14  
15  
16  
17  
18  
19  
20  
21  
22  
23 Previously, we have shown that the characteristic pattern of weakness associated with IBM is  
24 indicative of the diagnosis, even if Griggs pathological features are absent.[11] However, it is not  
25 invariably found at presentation. Here we sought to identify which pathological features, other than  
26 the Griggs pathological criteria, add further support to the diagnosis of IBM. We systematically  
27 investigated which pathological features are present in Griggs pathologically-definite IBM and then  
28 established the diagnostic utility of these features in cases of IBM lacking the Griggs criteria, using  
29 myopathies considered in the differential diagnosis of IBM as controls.  
30  
31  
32  
33  
34  
35  
36  
37  
38  
39

## 40 MATERIALS AND METHODS

41 The study received ethical approval from the Departments of Research and Development at Oxford  
42 University Hospitals NHS Trust, Oxford and University College London Hospitals NHS Foundation  
43 Trust, London.  
44  
45  
46  
47  
48

### 49 Cases

50 All patients were followed by specialist muscle services at the John Radcliffe Hospital, Oxford and  
51 the National Hospital for Neurology and Neurosurgery, London. Biopsies were taken for diagnostic  
52 purposes and prior to any treatment.  
53  
54  
55  
56  
57  
58  
59  
60

1  
2  
3 Methods for demonstrating pathological features in IBM, additional to those defined by the Griggs  
4  
5 criteria, were determined in six Griggs pathologically-definite cases of IBM. Cases with no clinical or  
6  
7 pathological evidence of neuromuscular disease were used as controls. The diagnostic utility of the  
8  
9 pathological features identified was assessed in two groups of clinically-typical IBM; one with  
10  
11 rimmed vacuoles on muscle biopsy (IBM+RV; n=15), the other without rimmed vacuoles on muscle  
12  
13 biopsy (IBM-RV; n=9). Disease controls were cases of steroid-responsive inflammatory myopathies  
14  
15 [polymyositis and dermatomyositis; (PM&DM); n=11], protein accumulation myopathies with  
16  
17 rimmed vacuoles (PAM; n=7). Clinical characteristics and inclusion criteria are summarised in  
18  
19 Supplementary tables 1 and 2. Tissue from brains donated to the Queen Square Brain Bank for  
20  
21 Neurological Disorders was used as positive controls for protein aggregate staining.  
22  
23

24  
25 Tissue sections were stained with haematoxylin and eosin (H&E), combined cytochrome oxidase  
26  
27 (COX) succinate dehydrogenase (SDH) histochemistry and for amyloid using alkalised Congo red,  
28  
29 crystal violet and thioflavin S. Immunohistochemistry (IHC) was performed using eight  $\mu\text{m}$  frozen  
30  
31 sections. Sections were fixed, if required, incubated in 0.5% hydrogen peroxide then 5% normal goat  
32  
33 serum and then systematically stained for: 1) proteins classically associated with neurodegenerative  
34  
35 disease: tau and hyperphosphorylated tau, ubiquitin, A $\beta$  and  $\alpha$ -synuclein; 2) proteins more recently  
36  
37 reported in neurodegenerative disease: p62, TDP-43, fused in sarcoma protein (FUS) and valosin  
38  
39 containing protein (VCP); 3) nuclear membrane proteins: lamin A/C and emerin; 4) proteins  
40  
41 associated with MFM: desmin, myotilin and  $\alpha$ B-crystallin; and 5) inflammatory cells and major  
42  
43 histocompatibility complex class I (MHC Class I): T-cells, helper T-cells, cytotoxic T-cells, B-cells  
44  
45 and macrophages. Primary antibody binding was visualised using Dako REAL™ EnVision™  
46  
47 Detection System. Details of commercial antibodies and conditions used are provided in  
48  
49 Supplementary Table 3. IHC was performed using a positive and negative control.  
50  
51  
52  
53  
54  
55  
56  
57  
58  
59  
60

### Definitions and quantification

The total number of fibres and the number undergoing partial invasion, containing rimmed vacuoles, protein aggregates and COX-negative SDH-positive (COX-/SDH+) fibres were quantified using ImagePro version 6.2 (Media Cybernetics), to ensure that the whole biopsy was systematically analysed. Only transversely-orientated fibres not undergoing necrosis or regeneration were quantified. Tissue sections stained with Congo red were visualised under fluorescent and polarised light. Areas of fluorescence were examined using rhodamine red (excitation 512-546 nm and emission 600-640 nm) and fluorescein isothiocyanate (excitation 440-480 nm and emission 527-530 nm) filters to exclude auto-fluorescence. Supplementary Table 4 provides definitions of the pathological features assessed. The inflammatory infiltrate and MHC Class I staining were analysed using a modified version of the semi-quantitative juvenile dermatomyositis score-tool (Supplementary Figure 1).[17] Assessments were performed blind to clinical details and diagnosis by a single individual (SB). Ten per cent of slides were re-counted to assess intra-observer reliability and 336 slides were assessed independently by two observers (SB and JLH) to determine inter-observer reliability.

### Statistical analysis

Statistical analyses were performed using GraphPad PRISM version 5. Continuous and categorical variables were compared using Mann Whitney *U*-test and chi-squared or Fisher's exact test respectively. Spearman's rank order correlation was used to determine the strength and direction of associations between pathological findings. Linear regression was used to determine relationships between clinical features and pathological findings. Test characteristics were calculated using receiver operating characteristic (ROC) curves and 2x2 contingency tables. A test was considered diagnostic when sensitivity >75% and specificity >95% or sensitivity >95% and specificity >75%. Intra-observer and inter-observer agreement was calculated using Bland-Altman plots and Cohen's kappa statistic ( $\kappa$ ). Repeat counts were within 95% confidence intervals using Bland-Altman plots and  $\kappa$  was  $\geq 0.7$  indicating good intra-observer and good or excellent inter-observer reliability. Statistical significance was set at  $p < 0.05$ .

## RESULTS

### Pathological findings in Griggs' pathologically-definite IBM

p62, TDP-43, ubiquitin, myotilin and  $\alpha$ B-crystallin immunoreactive aggregates were present in all six IBM cases but not in normal controls (Figures 1A-E). p62 and  $\alpha$ B-crystallin immunoreactive aggregates were present in a greater percentage of fibres than the pathological features required in the Griggs criteria ( $p < 0.05$ ) (Figure 2). Despite their abundance,  $\alpha$ B-crystallin immunoreactive aggregates were difficult to quantify due to a significant variability in their morphology. No immunoreactive deposits were observed in IBM cases or normal controls with antibodies to tau and phosphorylated tau, A $\beta$ ,  $\alpha$ -synuclein, desmin, emerin, lamin A/C, FUS or VCP. Alkalinised Congo red staining was more sensitive than crystal violet and thioflavin S staining for observing amyloid aggregates (Figure 1F). Tissue sections containing congophilic deposits identified under fluorescence light showed no apple-green birefringence under polarised light. Mitochondrial changes and increased sarcolemmal and sarcoplasmic MHC Class I staining were observed in all six IBM cases, but not in normal controls. The inflammatory infiltrate was predominantly composed of endomysial cytotoxic T-cells and macrophages, with relatively few B-cells.

### Quantitative analysis of pathological features in IBM and disease controls

Having shown that p62, TDP-43, ubiquitin and myotilin aggregates, congophilic deposits, MHC Class I and inflammatory cells were prevalent in Griggs' pathologically-definite IBM, the presence of these abnormalities, together with mitochondrial changes were assessed in IBM+RV, IBM-RV and disease controls.

The percentage of fibres containing p62, TDP-43, myotilin and ubiquitin aggregates and congophilic deposits were greater in IBM+RV than in IBM-RV; there was no difference in the number of COX-/SDH+ fibres (Figure 3A-F). Protein aggregates were observed in morphologically-normal fibres and in fibres exhibiting Griggs' pathological features. p62 and TDP-43 positive aggregates were present in a greater percentage of fibres in IBM+RV compared to PAM; however, there were no differences in



1  
2  
3 the percentage of fibres containing myotilin and ubiquitin aggregates or congophilic deposits. The  
4  
5 percentage of fibres containing p62, TDP-43 and ubiquitin aggregates or congophilic deposits were  
6  
7 similar in IBM-RV and PM&DM; however, myotilin aggregates were present in a greater percentage  
8  
9 of fibres in PM&DM and COX-/SDH+ fibres were more abundant in IBM-RV. Analysis of the  
10  
11 inflammatory infiltrate (T-cells, B-cells and macrophages) in the endomysium, perimysium and  
12  
13 perivascular areas revealed that there were greater numbers of inflammatory cells in the endomysium  
14  
15 and perimysium in IBM+RV than in PAM ( $p<0.03$ ). The distribution and intensity of the  
16  
17 inflammatory infiltrate in IBM-RV and PM&DM was similar.  
18  
19  
20

### 21 **Diagnostic utility of pathological features in IBM and disease controls**

22  
23 To mimic the diagnostic difficulty encountered in clinical practice, the ability of each test to  
24  
25 differentiate between myopathies containing rimmed vacuoles (IBM+RV and PAM) and between  
26  
27 inflammatory myopathies (IBM-RV and PM&DM) was assessed.  
28  
29  
30  
31

### 32 ***Diagnostic utility determined using receiver-operating characteristic curves***

33  
34 Individually, the presence of p62 immunoreactive inclusions and COX-/SDH+ fibres had the highest  
35  
36 sensitivity and specificity for differentiating IBM+RV from PAM, (Supplementary Figure 2) (Table  
37  
38 1). Differentiating between IBM-RV and PM&DM, myotilin positive inclusions or COX-/SDH+  
39  
40 fibres had the highest sensitivity and specificity for IBM-RV (Supplementary Figure 3) (Table 1).  
41  
42 Only the presence of myotilin positive inclusions satisfied criteria to be considered suitable as a  
43  
44 diagnostic test (<0.01% of fibres containing myotilin aggregates had a sensitivity of 100% and  
45  
46 specificity of 82% for IBM-RV).  
47  
48  
49  
50  
51  
52  
53  
54  
55  
56  
57  
58  
59  
60

**Table 1 Test characteristics**

| Test feature         | IBM+RV v. PAM |                                   |             |             | IBM-RV v. PM&DM |                                   |             |             |
|----------------------|---------------|-----------------------------------|-------------|-------------|-----------------|-----------------------------------|-------------|-------------|
|                      | AUC           | Cut-off<br>(% of affected fibres) | Sensitivity | Specificity | AUC             | Cut-off<br>(% of affected fibres) | Sensitivity | Specificity |
| Rimmed vacuoles      | 0.60          | >0.28                             | 0.53        | 0.71        | -               | -                                 | -           | -           |
| p62 aggregates       | 0.87          | >0.48                             | 0.87        | 0.86        | 0.60            | >0.21                             | 0.22        | 0.91        |
| TDP-43 aggregates    | 0.80          | >0.34                             | 0.80        | 0.86        | 0.53            | <0.01                             | 0.89        | 0.18        |
| Ubiquitin aggregates | 0.68          | >0.18                             | 0.53        | 0.85        | 0.64            | <0.01                             | 1.00        | 0.27        |
| Myotilin aggregates  | 0.55          | <0.25                             | 1.00        | 0.29        | 0.91            | <0.01                             | 1.00        | 0.82        |
| Congophilic deposits | 0.56          | >0.24                             | 0.73        | 0.71        | 0.56            | <0.03                             | 0.11        | 0.82        |
| COX-/SDH+ fibres     | 0.87          | >0.04                             | 0.86        | 0.86        | 0.93            | >0.1                              | 0.78        | 0.91        |

Table shows the area under the curve and optimum cut-off for each test with the accompanying sensitivity and specificity. AUC = Area under the curve.

***Diagnostic utility determined by comparing proportion of affected cases in each diagnostic group***

In the aforementioned experiments, the number of fibres within each muscle biopsy was quantified. However, this is impractical for routine clinical use. Thus, the proportions of affected cases in each group were compared (Table 2). This revealed that neither staining for protein aggregates nor congophilic deposits could differentiate between IBM+RV and PAM. The pathological findings in IBM-RV and PM&DM were also similar, except that the absence of myotilin immunoreactive aggregates was sensitive and specific for IBM-RV. COX-/SDH+ fibres were also suggestive of IBM-RV; one or more COX-/SDH+ fibres had a sensitivity of 100% and specificity 73% for IBM-RV.

Increased MHC Class I expression lacked specificity. However, strong (diffuse sarcolemmal and sarcoplasmic) MHC Class I up-regulation was diagnostic for IBM+RV, differentiating it from PAM, as were the presence of either endomysial T-cell or helper T-cell scores >1 or an endomysial cytotoxic T-cell score >0. Partial invasion was specific for IBM+RV, but lacked sensitivity. Greater numbers of perimysial T-cells, cytotoxic T-cells and endomysial B-cells were observed in PM&DM than in IBM-RV ( $p \leq 0.02$ ), however, this was not diagnostically useful. There was no difference in the proportion of cases with fibres undergoing partial invasion between IBM-RV and PM&DM.

**Table 2 Comparison of the proportion of positive cases in each group**

| Pathological features                     | IBM+RV   | PAM     | IBM+RV v. PAM |             | IBM-RV  | PM&DM    | IBM-RV v. PM&DM |             | IBM+RV v. IBM-RV |
|-------------------------------------------|----------|---------|---------------|-------------|---------|----------|-----------------|-------------|------------------|
|                                           | n (%)    | n (%)   | Sensitivity   | Specificity | n (%)   | n (%)    | Sensitivity     | Specificity | <i>p</i> value   |
| Number of cases                           | 15 (100) | 7 (100) |               |             | 9 (100) | 11 (100) |                 |             |                  |
| Aggregated proteins, n (%)                |          |         |               |             |         |          |                 |             |                  |
| p62                                       | 15 (100) | 6 (86)  | 1.00          | 0.14        | 4 (44)  | 3 (27)‡  | 0.40            | 0.72        | 0.003*           |
| TDP-43                                    | 13 (87)  | 5 (71)  | 0.87          | 0.29        | 1 (11)  | 2 (18)‡  | 0.11            | 0.82        | 0.001*           |
| Ubiquitin                                 | 11 (73)  | 4 (57)  | 0.73          | 0.43        | 0 (0)   | 3 (27)‡  | 0.00            | 0.73        | 0.001*           |
| Myotilin                                  | 10 (67)  | 5 (71)  | 0.67          | 0.29        | 0 (0)   | 9 (82)   | 0.00            | 0.18        | 0.002*           |
| Congophilic deposits                      | 13 (87)  | 7 (100) | 0.87          | 0.00        | 1 (11)  | 0 (0)    | 0.11            | 1.00        | 0.001*           |
| COX-/SDH+ fibres†, n (%)                  |          |         |               |             |         |          |                 |             |                  |
| Any                                       | 12 (86)  | 2 (29)  | 0.80          | 0.71        | 9 (100) | 3 (27)   | 1.00            | 0.73        | 0.5              |
| Inflammatory features, n (%)              |          |         |               |             |         |          |                 |             |                  |
| MHC Class I up-regulation                 | 15 (100) | 3 (43)  | 1.00          | 0.57        | 9 (100) | 11 (100) | 1.00            | 0.00        | 1.00             |
| Strong MHC Class I up-regulation          | 14 (93)  | 0 (0)   | 0.93          | 1.00        | 9 (100) | 10 (91)  | 1.00            | 0.09        | 0.53             |
| Partial invasion                          | 10 (67)  | 0 (0)   | 0.67          | 1.00        | 3 (33)  | 2 (18)   | 0.33            | 0.82        | 0.11             |
| Endomysial CD3+ T-cell score >1           | 13 (87)  | 0 (0)   | 0.87          | 1.00        | 4 (44)  | 7 (64)   | 0.44            | 0.36        | 0.02*            |
| Endomysial CD4+ helper T-cell score >1    | 12 (80)  | 0 (0)   | 0.80          | 1.00        | 2 (22)  | 5 (45)   | 0.22            | 0.46        | 0.01*            |
| Endomysial CD8+ cytotoxic T-cell score >0 | 14 (93)  | 0 (0)   | 0.93          | 1.00        | 4 (44)  | 5 (45)   | 0.44            | 0.54        | 0.02*            |
| Endomysial CD68+ macrophage score >1      | 12 (80)  | 0 (0)   | 0.80          | 1.00        | 4 (44)  | 8 (73)   | 0.44            | 0.17        | 0.07             |

†In IBM with rimmed vacuoles *n*=14. ‡Pathological features present in DM, but not PM cases. \*Statistically significant results.

1  
2  
3 Because IBM-RV is more pathologically akin to PM than DM, analyses were repeated comparing  
4 IBM-RV and PM cases ( $n=6$ ). No p62, TDP-43 or ubiquitin immunoreactive aggregates were  
5  
6 observed in PM cases and the diagnostic utility of tests for differentiating between IBM-RV and PM  
7  
8 yielded similar results to prior analyses between IBM-RV and PM&DM.  
9

### 10 11 12 13 ***Diagnostic utility of categorising the pattern of p62 staining***

14  
15 The pattern of p62 staining could be categorised into four distinct groups (Figure 1G-J). Aggregates  
16  
17 observed in IBM were present in vacuolated and non-vacuolated fibres and were strongly stained,  
18  
19 discreet and clearly delineated, round or angular and typically located subsarcolemmal, perinuclear  
20  
21 and peri-vacuolar (pattern I). This pattern was observed in every IBM case with p62 aggregates, one  
22  
23 (9%) case of DM and three (43%) cases of PAM (hereditary IBM, dystrophinopathy and genetically  
24  
25 undefined MFM). Patterns II and III were associated with PAM, particularly myotilinopathy ( $n=2$ ;  
26  
27 67%), and DM ( $n=2$ ; 40%) respectively. Pattern IV occurred in a genetically undefined case of MFM.  
28  
29 No differences were observed in the morphology of TDP-43, myotilin or ubiquitin aggregates  
30  
31 between biopsies.  
32  
33  
34  
35

### 36 **Clinicopathological correlation**

37  
38 In IBM+RV, IBM-RV and pathologically-definite IBM, there were no correlations in individual  
39  
40 biopsies between pathological features. No relationships were identified between the pathological  
41  
42 findings and age at symptom onset, age at biopsy, disease duration or serum creatine kinase. The same  
43  
44 results were obtained when the IBM groups were analysed separately and as one.  
45  
46  
47

### 48 **Proposed diagnostic algorithm**

49  
50 Based on our pathological findings, we propose a diagnostic algorithm for differentiating IBM from  
51  
52 its disease mimics (Figure 4).  
53  
54  
55  
56  
57  
58  
59  
60

1  
2  
3 The algorithm was tested in a further 23 cases that fulfilled the criteria for IBM+RV ( $n=12$ ) and IBM-  
4 RV ( $n=11$ ). The algorithm correctly diagnosed 20 (87%) cases: 12 (100%) cases of IBM+RV and  
5 eight (73%) cases of IBM-RV. In IBM-RV, COX-/SDH+ fibres were present in 8 (73%) cases,  
6  
7 pattern I p62 aggregates in 8 (73%) cases and both in 6 (55%) cases.  
8  
9

## 10 11 12 13 **DISCUSSION**

14 While Griggs' pathological criteria have been accepted as diagnostic of IBM, many patients who,  
15 observed over time undoubtedly have IBM, lack one or more of the Griggs pathological features at  
16 presentation, and even on repeat biopsy.[8,11] Despite IBM being associated with a characteristic  
17 pattern of finger flexor and knee extensor weakness, not all patients have this pattern at disease onset,  
18 and muscle biopsy remains an important tool in differentiating IBM from its mimics. We sought to  
19 determine which additional pathological features support a diagnosis of IBM, demonstrating that  
20 characteristic p62 immunoreactive aggregates, strong MHC Class I upregulation, endomysial  
21 cytotoxic T-cell score  $>0$  and COX-/SDH+ fibres are features with sufficient sensitivity and  
22 specificity to differentiate IBM from pathologically similar myopathies and we propose an easily  
23 applied pathological algorithm for the diagnosis of IBM (Figure 4).  
24  
25  
26  
27  
28  
29  
30  
31  
32  
33  
34  
35  
36

37 In agreement with previous studies, we observed p62,[18] TDP-43,[19] ubiquitin [13] and  $\alpha$ B-  
38 crystallin [20] immunoreactive aggregates and a predominantly endomysial inflammatory infiltrate  
39 [3] in Griggs pathologically-definite IBM. Diagnostic pathological studies of IBM have concentrated  
40 on differentiating IBM from other inflammatory myopathies and two recent quantitative studies have  
41 found that TDP-43, p62 and LC3 may be of diagnostic use.[21,22] However, in these studies only a  
42 fraction of each biopsy was analysed i.e. 200 fibres. We have found this limited quantification does  
43 not correlate with the percentage of affected fibres in a biopsy nor does it reflect the way in which a  
44 muscle biopsy is assessed. Additionally, studies have lacked vacuolar myopathy control cases as it is  
45 believed that the inflammatory changes present in IBM enable it to be easily differentiated from other  
46 vacuolar myopathies.[22] However, inflammatory changes are not infrequently observed in muscular  
47  
48  
49  
50  
51  
52  
53  
54  
55  
56  
57  
58  
59  
60

1  
2  
3 dystrophies and the degree of inflammatory change necessary to confidently diagnose IBM is  
4  
5 currently unknown.  
6  
7

8  
9 To mimic the typical diagnostic conundrums encountered in clinical practice, we evaluated the ability  
10  
11 of the pathological findings to differentiate IBM+RV from other vacuolar myopathies and IBM-RV  
12  
13 from steroid-responsive inflammatory myopathies. We found that quantitative analysis of protein  
14  
15 aggregates, congophilic deposits and COX-/SDH+ fibres was of limited diagnostic use. Analysing the  
16  
17 biopsies dichotomously and using a semi-quantitatively score-tool revealed that increased MHC Class  
18  
19 I labelling was sensitive for IBM making it a good initial screening test, its absence excluding the  
20  
21 diagnosis. In agreement with an earlier study, we found p62 aggregates identified the largest number  
22  
23 of affected fibres in IBM.[23] Additionally, as a novel finding, the morphology and distribution of  
24  
25 p62 aggregates was characteristic in IBM. This characteristic pattern of p62 immunoreactive  
26  
27 aggregates was 100% sensitive for IBM+RV; their absence from a biopsy containing rimmed  
28  
29 vacuoles effectively ruling-out a diagnosis of IBM. We confirmed that the most diagnostically useful  
30  
31 pathological findings in IBM+RV were evidence of an immune mediated process; strong MHC Class  
32  
33 I staining or an endomysial cytotoxic T-cell score >0 were both diagnostic. Having identified either  
34  
35 of these features in a biopsy containing rimmed vacuoles no extra diagnostic certainty was gained  
36  
37 from observing partial invasion, COX-/SDH+ fibres or congophilic deposits.  
38  
39

40  
41 The most discriminative pathological tests for differentiating between IBM-RV and PM&DM were  
42  
43 COX/SDH staining and myotilin IHC. Consistent with a recent study,[9] we found the absence of  
44  
45 mitochondrial changes to be strong evidence against a diagnosis of IBM. There was no difference in  
46  
47 the median age between IBM-RV and PM&DM cases to account for the difference observed in COX-  
48  
49 /SDH+ fibres. The presence of myotilin and ubiquitin immunoreactive aggregates appeared to rule out  
50  
51 a diagnosis of IBM-RV. However, we believe the presence of these features in IBM+RV indicates  
52  
53 that they are unlikely to be diagnostically reliable features for differentiating between IBM-RV and  
54  
55 steroid-responsive inflammatory myopathies. Pattern I p62 immunoreactive aggregates were only  
56  
57  
58  
59  
60

1  
2  
3 present in 44% of the initial IBM-RV cases tested, but they were not observed in PM cases and were  
4 very rare in DM. Their presence in a further eight out of 11 (73%) cases of IBM-RV that were  
5 assessed suggests that p62 IHC warrants further investigation and validation in a larger, independent  
6 series.  
7  
8  
9

10  
11  
12 Almost all pathological features - protein aggregates, congophilic deposits and inflammation - were  
13 more abundant in IBM+RV than IBM-RV. Despite using slightly different inclusion criteria, similar  
14 differences have been reported between pathologically-typical and pathologically-atypical IBM.[21]  
15 However, we found no differences in the number of COX-/SDH+ fibres, the degree of MHC Class I  
16 upregulation, the morphology and distribution of p62 immunoreactive aggregates or the pattern of the  
17 inflammation between IBM+RV and IBM-RV, supporting our clinical observations that these are the  
18 same disease. We believe that the pathological differences between IBM+RV and IBM-RV are, in  
19 part, due to differences in disease duration. Two studies have shown that rimmed vacuoles are more  
20 common in patients who are older at the time of muscle biopsy,[24,11] suggesting that they are  
21 associated with chronologically more advanced disease. Therefore, the pathological findings which  
22 are more abundant in IBM+RV and thought to be typical of IBM may instead be indicative of  
23 chronologically more advanced disease explaining their limited sensitivity at disease presentation.  
24 However, possibly due to the number of cases analysed, we were unable to confirm a relationship  
25 between pathological features and clinical findings.  
26  
27  
28  
29  
30  
31  
32  
33  
34  
35  
36  
37  
38  
39  
40  
41  
42

43 A robust clinicopathological definition of IBM is of paramount importance for diagnosis and for  
44 selection and entry of patients into clinical trials. We have shown that certain pathological findings  
45 are more abundant than those included in the current pathologically-focussed diagnostic criteria.  
46 Moreover, p62 immunoreactive deposits, increased MHC Class I expression, endomysial cytotoxic T-  
47 cells and COX-/SDH+ fibres have sufficient sensitivity and specificity to enable the histological  
48 differentiation of IBM from disease mimics, supporting their inclusion as diagnostic criteria for IBM  
49 alongside clinical criteria. Using our diagnostic algorithm, we found there would be little additional  
50  
51  
52  
53  
54  
55  
56  
57  
58  
59  
60

1  
2  
3 diagnostic security in identifying partial invasion, performing EM or staining for amyloid deposits.  
4  
5 Finally, mitochondrial changes and MHC Class I up-regulation were the most consistent findings in  
6  
7 our IBM cases suggesting that they are central to the pathogenesis and that further investigation and  
8  
9 therapeutic intervention should be directed towards these features.  
10

## 11 12 13 REFERENCES

- 14  
15 1. Needham M, James I, Corbett A, Day T, Christiansen F, Phillips B, et al. Sporadic inclusion  
16  
17 body myositis: phenotypic variability and influence of HLA-DR3 in a cohort of 57 Australian  
18  
19 cases. *J Neurol Neurosurg Psychiatr.* 2008;79:1056–60.  
20
- 21  
22 2. Griggs RC, Askanas V, DiMauro S, Engel A, Karpata G, Mendell JR, et al. Inclusion body  
23  
24 myositis and myopathies. *Ann Neurol.* 1995;38:705–13.  
25
- 26  
27 3. Arahata K, Engel AG. Monoclonal antibody analysis of mononuclear cells in myopathies. I:  
28  
29 Quantitation of subsets according to diagnosis and sites of accumulation and demonstration and  
30  
31 counts of muscle fibers invaded by T cells. *Ann Neurol.* 1984;16:193–208.  
32
- 33  
34 4. Mhiri C, Gherardi R. Inclusion body myositis in French patients. A clinicopathological  
35  
36 evaluation. *Neuropathol Appl Neurobiol.* 1990;16:333–44.  
37
- 38  
39 5. Villanova M, Kawai M, Lübke U, Oh SJ, Perry G, Six J, et al. Rimmed vacuoles of inclusion  
40  
41 body myositis and oculopharyngeal muscular dystrophy contain amyloid precursor protein and  
42  
43 lysosomal markers. *Brain Res.* 1993;603:343–7.  
44
- 45  
46 6. Van der Meulen MF, Hoogendijk JE, Moons KG, Veldman H, Badrising UA, Wokke JH.  
47  
48 Rimmed vacuoles and the added value of SMI-31 staining in diagnosing sporadic inclusion  
49  
50 body myositis. *Neuromuscul Disord.* 2001;11:447–51.  
51
- 52  
53 7. Ferrer I, Olivé M. Molecular pathology of myofibrillar myopathies. *Expert Rev Mol Med.*  
54  
55 2008;10:e25.  
56
- 57  
58 8. Amato AA, Gronseth GS, Jackson CE, Wolfe GI, Katz JS, Bryan WW, et al. Inclusion body  
59  
60 myositis: clinical and pathological boundaries. *Ann Neurol.* 1996;40:581–6.



- 1  
2  
3 9. Chahin N, Engel AG. Correlation of muscle biopsy, clinical course, and outcome in PM and  
4 sporadic IBM. *Neurology*. 2008;70:418–24.
- 5  
6  
7 10. Benveniste O, Guiguet M, Freebody J, Dubourg O, Squier W, Maisonobe T, et al. Long-term  
8 observational study of sporadic inclusion body myositis. *Brain*. 2011;134:3176–84.
- 9  
10  
11 11. Brady S, Squier W, Hilton-Jones D. Clinical assessment determines the diagnosis of inclusion  
12 body myositis independently of pathological features. *J Neurol Neurosurg Psychiatr*. 2013; 16.
- 13  
14  
15 12. Greenberg SA. Theories of the Pathogenesis of Inclusion Body Myositis. *Current*  
16  
17  
18  
19  
20  
21  
22  
23  
24  
25  
26  
27  
28  
29  
30  
31  
32  
33  
34  
35  
36  
37  
38  
39  
40  
41  
42  
43  
44  
45  
46  
47  
48  
49  
50  
51  
52  
53  
54  
55  
56  
57  
58  
59  
60  
12. *Rheumatology Reports*. 2010;12:221–8.
13. Sherriff FE, Joachim CL, Squier MV, Esiri MM. Ubiquitinated inclusions in inclusion-body  
myositis patients are immunoreactive for cathepsin D but not  $\beta$ -amyloid. *Neuroscience Letters*.  
1995;194:37–40.
14. Greenberg SA. How citation distortions create unfounded authority: analysis of a citation  
network. *BMJ*. 2009;339:b2680.
15. Needham M, and Mastaglia FL. (2007). Inclusion body myositis: current pathogenetic concepts  
and diagnostic and therapeutic approaches. *Lancet Neurol*. 6, 620–631.
16. Benveniste O, Hilton-Jones D. International Workshop on Inclusion Body Myositis held at the  
Institute of Myology, Paris, on 29 May 2009. *Neuromuscular Disorders*. 2010;20:414–21.
17. Wedderburn LR, Varsani H, Li CKC, Newton KR, Amato AA, Banwell B, et al. International  
consensus on a proposed score system for muscle biopsy evaluation in patients with juvenile  
dermatomyositis: a tool for potential use in clinical trials. *Arthritis Rheum*. 2007;57:1192–201.
18. Nogalska A, Terracciano C, D'Agostino C, King Engel W, Askanas V. p62/SQSTM1 is  
overexpressed and prominently accumulated in inclusions of sporadic inclusion-body myositis  
muscle fibers, and can help differentiating it from polymyositis and dermatomyositis. *Acta*  
*Neuropathol*. 2009;118:407–413.
19. Wehl CC, Temiz P, Miller SE, Watts G, Smith C, Forman M, Hanson PI, Kimonis V, Pestronk  
A. TDP-43 accumulation in inclusion body myopathy muscle suggests a common pathogenic

- 1  
2  
3 mechanism with frontotemporal dementia. *J. Neurol. Neurosurg. Psychiatr.* 2008;79:1186–  
4 1189.  
5  
6  
7 20. Banwell BL, Engel AG. Alpha B-crystallin immunolocalization yields new insights into  
8 inclusion body myositis. *Neurology.* 2000;54:1033–1041.  
9  
10  
11 21. Dubourg O, Wanschitz J, Maisonobe T, Béhin A, Allenbach Y, Herson S, and Benveniste O.  
12 Diagnostic value of markers of muscle degeneration in sporadic inclusion body myositis. *Acta*  
13 *Myol.* 2011. 30, 103–108.  
14  
15  
16  
17 22. Hiniker A, Daniels BH, Lee HS, Margeta M. Comparative utility of LC3, p62 and TDP-43  
18 immunohistochemistry in differentiation of inclusion body myositis from polymyositis and  
19 related inflammatory myopathies. *Acta Neuropathologica Communications.* 2013. 1:29.  
20  
21  
22  
23 23. D’Agostino C, Nogalska A, Engel WK, Askanas V. In sporadic inclusion-body myositis muscle  
24 fibres TDP-43-positive inclusions are less frequent and robust than p62-inclusions, and are not  
25 associated with paired helical filaments. *Neuropathol Appl Neurobiol.* 2010; Available from:  
26 <http://www.ncbi.nlm.nih.gov/pubmed/20626631>.  
27  
28  
29  
30  
31 24. Momma K, Noguchi S, Malicdan MCV, Hayashi YK, Minami N, Kamakura K, et al. Rimmed  
32 vacuoles in Becker muscular dystrophy have similar features with inclusion myopathies. *PLoS*  
33 *ONE.* 2012;7:e52002.  
34  
35  
36  
37  
38  
39

#### ACKNOWLEDGEMENTS

40  
41 SB is funded by the Myositis Support Group. JLH is supported by the Reta Lila Weston Institute for  
42 Neurological Studies and the Myositis Support Group. This work was undertaken at UCLH/UCL who  
43 received a proportion of funding from the Department of Health’s NIHR Biomedical Research  
44 Centres funding scheme.  
45  
46  
47  
48  
49

#### CONTRIBUTORSHIP STATEMENT

50  
51  
52  
53 Dr Stefen Brady - Acquisition of data, analysis and interpretation of data and drafting of manuscript.  
54  
55 Dr Waney Squier - Critical revision of manuscript for important intellectual content.  
56  
57  
58  
59  
60

1  
2  
3 Prof. Caroline Sewry - Study concept and design and critical revision of manuscript for important  
4 intellectual content.

5  
6 Prof. Mike Hanna - Critical revision of manuscript for important intellectual content.

7  
8 Dr David Hilton-Jones - Critical revision of manuscript for important intellectual content.

9  
10 Dr Janice Holton - Study concept and design, critical revision of manuscript for important intellectual  
11 content and study supervision.  
12

### 13 14 15 16 17 **DATA SHARING**

18 All additional data can be found in supplementary tables and figures.  
19

### 20 21 22 23 **Supplementary Figure 1 IBM inflammatory score-tool**

24 Score tool modified from the published juvenile dermatomyositis inflammatory (JDM) score tool [17]  
25 to specifically assess the type, degree and distribution of inflammation in IBM. The inflammatory  
26 domain was augmented to include T-cells, T-cell subtypes, B-cells and macrophages. MHC Class I  
27 staining was expanded to include three patterns of labelling. The vascular, muscle fibre and  
28 connective tissue domains which are present in the JDM score tool were not included.  
29  
30  
31  
32  
33  
34  
35  
36  
37

### 38 39 **Figure 1 Protein aggregates and congophilic deposits in IBM**

40 Stained cryostat sections, showing fibres, often in clusters, containing protein aggregates stained for  
41 p62 (A), TDP-43 (B), ubiquitin (C),  $\alpha$ B-crystallin (D) and myotilin (E). Protein aggregates were  
42 present throughout fibres, and were observed in apparently normal fibres, vacuolated fibres and fibres  
43 surrounded by inflammatory infiltrates. In fibres containing TDP-43 aggregates, myonuclear TDP-43  
44 staining was frequently reduced (B). Congophilic deposits were observed in vacuolated fibres using  
45 epifluorescence (F). Tissue sections were examined using both the rhodamine red and fluorescein  
46 isothiocyanate filters to exclude areas of auto-fluorescence (arrow). Combined fluorescent image is  
47 shown. Four patterns of immunoreactivity were observed in IBM and disease controls stained for p62  
48 using IHC (G)(H)(I)(J). Pattern I (G) - strongly stained, discreet and clearly delineated, round or  
49  
50  
51  
52  
53  
54  
55  
56  
57

1  
2  
3 angular aggregates, variable in number and size within a muscle fibre but rarely filling it and  
4  
5 predominantly located subsarcolemmal, but also perinuclear and adjacent to vacuoles. Pattern II (H) -  
6  
7 large aggregates of variable staining intensity. Pattern III (I) - fine granular aggregates dispersed  
8  
9 throughout the fibre. Pattern IV (J) - fine granules and wisps of p62 immunoreactivity set within  
10  
11 weakly basophilic inclusions.

12  
13 Scale bar represents 50  $\mu\text{m}$  in A and D; 25  $\mu\text{m}$  in B, C and E-J.

14  
15  
16  
17 **Figure 2 Percentage of muscle fibres containing protein aggregates and Griggs' pathological**  
18  
19 **features**

20  
21 Box and whisker plot illustrating the percentage of muscle fibres containing pathological  
22  
23 abnormalities contained in the Griggs criteria and protein aggregates in Griggs' pathologically-  
24  
25 definite IBM. Fibres containing aggregates immunoreactive for p62 and  $\alpha\text{B}$ -crystallin were more  
26  
27 frequent than those containing the current diagnostic pathological features (red bars) ( $p < 0.05$ ). Protein  
28  
29 aggregates recognised by all antibodies were found in a significantly larger number of fibres than  
30  
31 partial invasion ( $p < 0.02$ ).  
32

33  
34  
35  
36 **Figure 3 Percentage of fibres containing protein aggregates and COX-/SDH+ fibres in each**  
37  
38 **group**

39  
40 Box and whisker plots illustrating the percentage of fibres in each diagnostic category containing p62  
41  
42 (A), TDP-43 (B), myotilin (C) and ubiquitin (D) immunoreactive aggregates, congophilic deposits (E)  
43  
44 and COX-/SDH+ fibres (F). All protein aggregates were present in a greater percentage of fibres in  
45  
46 IBM+RV than in IBM-RV. There was no difference in the percentage of COX-/SDH+ muscle fibres  
47  
48 between these groups. IBM+RV biopsies had a greater percentage of fibres containing p62 (A) and  
49  
50 TDP-43 (B) immunoreactive aggregates and COX-/SDH+ fibres (F) than PAM. Pathological findings  
51  
52 were similar in IBM-RV and PM&DM, with no differences in the percentage of fibres containing p62  
53  
54 (A), TDP-43 (B) and ubiquitin (D) immunoreactive aggregates or congophilic deposits (E). However,  
55  
56 there was a greater percentage of COX-/SDH+ fibres (F) in IBM-RV than PM&DM and a greater  
57

percentage of fibres containing myotilin immunoreactive aggregates (C) in PM&DM than IBM-RV.

\*Statistically significant results.

### **Supplementary Figure 2 Sensitivity and specificity of rimmed vacuoles, protein aggregates and mitochondrial changes in IBM+RV compared to PAM**

Receiver operating characteristic curves for each test including the area under the curve and optimum cut-off with its associated sensitivity and specificity for rimmed vacuoles (A), myotilin (B), ubiquitin (C), TDP-43 (D), p62 (E) immunoreactive deposits, congophilic deposits (F) and COX-/SDH+ fibres (G). COX/SDH HC staining was the most discriminative test for differentiating IBM+RV and PAM (G). However, there was little difference between COX/SDH HC staining, TDP-43 and p62 IHC staining and none were sufficiently discriminative to be considered diagnostic. AUC = Area under the curve.

### **Supplementary Figure 3 Sensitivity and specificity of protein aggregates and mitochondrial changes in IBM-RV compared to PM&DM**

Receiver operating characteristic curves for each test showing the area under the curve and optimum cut-off with its sensitivity and specificity for myotilin (A), ubiquitin (B), TDP-43 (C), p62 (D) immunoreactive deposits, congophilic deposits (E) and COX-/SDH+ fibres (F). COX/SDH histochemical staining (F) and myotilin (G) IHC were the most discriminative tests for differentiating IBM-RV and PM&DM. AUC = Area under the curve.

### **Figure 4 Proposed diagnostic algorithm for IBM based on pathological findings**

Flow diagram showing a proposed pathway for diagnosing IBM based on the pathological findings. Increased MHC Class I staining was observed in all cases of IBM and pattern I p62 aggregates in all cases of IBM+RV making them good initial screening tests. Their absence rules-out a diagnosis of IBM and IBM+RV respectively. The presence of an endomysial cytotoxic T-cell score >0 or strong MHC Class I staining in a biopsy with rimmed vacuoles and p62 aggregates secures a diagnosis of IBM+RV. Differentiating IBM-RV and PM&DM pathologically is more challenging. The presence of

20

1  
2  
3  
4  
5  
6  
7  
8  
9  
10  
11  
12  
13  
14  
15  
16  
17  
18  
19  
20  
21  
22  
23  
24  
25  
26  
27  
28  
29  
30  
31  
32  
33  
34  
35  
36  
37  
38  
39  
40  
41  
42  
43  
44  
45  
46  
47  
48  
49  
50  
51  
52  
53  
54  
55  
56  
57  
58  
59  
60

COX-/SDH+ fibres is not specific to IBM-RV. However, an absence of COX-/SDH+ fibres effectively rules-out a diagnosis of IBM-RV. Pattern I p62 aggregates may enable IBM to be differentiated from PM when present. However, they may lack sensitivity for IBM-RV, therefore their absence does not rule out the diagnosis.

For peer review only

**Supplementary Table 1 Clinical characteristics**

| Characteristic                               | G-IBM              | IBM+RV             | IBM-RV            | PM&DM              | PAM                | IBM+RV*          | IBM-RV*          |
|----------------------------------------------|--------------------|--------------------|-------------------|--------------------|--------------------|------------------|------------------|
| Number of cases                              | 6                  | 15                 | 9                 | 11                 | 7                  | 12               | 11               |
| Male:female                                  | 5:1                | 10:5               | 4:5               | 4:3                | 4:7                | 10:2             | 9:2              |
| Median age at symptom onset, years (IQR)     | 69 (66-70)         | 54 (49-67)         | 62 (48-68)        | 55 (34-65)         | 46 (24-54)         | 58 (55-73)       | 60 (57-72)       |
| Median age at muscle biopsy, years (IQR)     | 77 (68-78)         | 64 (59-71)         | 68 (47-74)        | 55 (34-65)         | 54 (29-59)         | 66 (62-77)       | 70 (63-74)       |
| Median duration of symptoms, years (IQR)     | 5 (3-9)            | 5 (4-7)            | 3 (2-8)           | 0 (0-0)            | 5 (3-9)            | 5 (4-7)          | 4 (3-7)          |
| Mean creatine kinase, IU/L, mean ( $\pm$ SD) | 377 ( $\pm$ 213)   | 1748 ( $\pm$ 1348) | 926 ( $\pm$ 800)  | 6744 ( $\pm$ 5875) | 739 ( $\pm$ 320)   | 662 ( $\pm$ 360) | 466 ( $\pm$ 338) |
| Mean number of muscle fibres per biopsy      | 2929 ( $\pm$ 1357) | 1463 ( $\pm$ 954)  | 1795 ( $\pm$ 990) | 3534 ( $\pm$ 1934) | 2749 ( $\pm$ 1357) | NA               | NA               |

G-IBM = Griggs' pathologically-definite IBM; IQR = Interquartile range; SD = Standard deviation; NA = Not applicable. \*Cases used to test proposed diagnostic flow-chart.

Supplementary Table 2 Clinical inclusion criteria

| Diagnostic category | Criteria                                                                                                                                                                                                                                                                                                                                                                          |
|---------------------|-----------------------------------------------------------------------------------------------------------------------------------------------------------------------------------------------------------------------------------------------------------------------------------------------------------------------------------------------------------------------------------|
| G-IBM               | Patients fulfilling Griggs' definite criteria (rimmed vacuoles, inflammatory infiltrate with partial invasion of fibres and 15-18 nm tubulofilaments on EM) with prominent finger flexor and knee extensor weakness and CK <12 x ULN.                                                                                                                                             |
| IBM+RV              | Age at symptom onset >45 years, symptoms present for >12 months, finger flexion strength less than shoulder abduction strength and knee extension weakness greater than hip flexion weakness, CK ≤15 x ULN and a muscle biopsy revealing rimmed vacuoles on H&E or GT stained sections without features inconsistent with IBM on a standard diagnostic histological assessment.   |
| IBM-RV              | Clinical features and CK as detailed under IBM+RV. Rimmed vacuoles absent on H&E and GT stained sections and without features inconsistent with IBM on a standard diagnostic histological assessment.                                                                                                                                                                             |
| PAM                 | Genetically or clinically and pathologically confirmed cases of PAM with typical rimmed vacuoles present on muscle biopsy. Cases included myotilinopathy (n=2), hIBM with compound heterozygous mutations in GNE (n=1), IBMPFD with mutation in VCP (n=1), genetically unconfirmed cases of myofibrillar myopathy (n=2), and dystrophinopathy with deletion of exons 45-47 (n=1). |
| PM&DM               | Subacute onset of limb girdle weakness, significantly raised CK, inflammatory cell infiltrate present on muscle biopsy and a sustained unequivocal clinical and biochemical response to steroid immunosuppression. DM cases also had to have cutaneous manifestations consistent with the diagnosis.                                                                              |
| Normal controls     | Patients investigated for cramps or fatigue, normal clinical examination performed by a muscle specialist, normal CK, normal neurophysiological assessment and normal muscle biopsy.                                                                                                                                                                                              |

G-IBM = Griggs' pathologically-definite IBM; IBM+RV = Clinically-typical IBM with rimmed vacuoles; IBM-RV = Clinically typical IBM lacking rimmed vacuoles; PAM = Protein accumulation myopathies with rimmed vacuoles; PM&DM = Steroid-responsive inflammatory myopathies; hIBM = Hereditary inclusion body myopathy; IBMPFD = Inclusion body myopathy with Paget's disease and frontotemporal dementia; CK = Creatine kinase; GT = Gomori trichrome; ULN = Upper limit of normal.



Supplementary Table 3 Antibodies and optimum staining conditions

| Antibody                | Source            | Clone | Control tissue | Fixative   | Dilution | Primary incubation conditions |
|-------------------------|-------------------|-------|----------------|------------|----------|-------------------------------|
| p62                     | BD Transduction   | 3/P62 | AD brain       | A          | 1:400    | 1 hour, RT                    |
| TDP-43                  | Proteintech       | NA    | FTLD-TDP brain | PFA        | 1:800    | 24 hours, 4°C                 |
| Tau*                    | Dako              | NA    | AD brain       | A          | 1:1600   | 1 hour, RT                    |
| Phosphorylated tau**    | Autogen Bioclear  | AT8   | AD brain       | A          | 1:1600   | 1 hour, RT                    |
| Ubiquitin               | Dako              | NA    | AD brain       | A          | 1:100    | 1 hour, RT                    |
| A $\beta$               | Dako              | 6F/3D | AD brain       | PFA and FA | 1:100    | 1 hour, RT                    |
| $\alpha$ -synuclein     | Abcam             | 4D6   | MSA brain      | PBS        | 1:800    | 1 hour, RT                    |
| FUS                     | Novus Biologicals | NA    | FTLD-FUS brain | A          | 1:2000   | 1 hour, RT                    |
| Desmin                  | Dako              | D33   | Normal muscle  | A          | 1:50     | 24 hours, 4°C                 |
| Myotilin                | Novocastra        | RSO34 | Normal muscle  | A          | 1:500    | 24 hours, 4°C                 |
| $\alpha$ B-crystallin   | Novocastra        | G2JF  | CBD brain      | A          | 1:300    | 1 hour, RT                    |
| VCP                     | Abcam             | 5     | Normal muscle  | A          | 1:100    | 1 hour, RT                    |
| Lamin A/C               | Novocastra        | 636   | Normal muscle  | A          | 1:50     | 1 hour, RT                    |
| Emerin                  | Novocastra        | 4G5   | Normal muscle  | A          | 1:400    | 1 hour, RT                    |
| MHC Class I             | Novocastra        | W6/32 | Normal muscle  | A          | 1:25     | 24 hours, 4°C                 |
| CD3 (T-cells)           | Novocastra        | UCHT1 | Tonsil         | A          | 1:100    | 1 hour, RT                    |
| CD4 (Helper T-cells)    | Novocastra        | 4B12  | Tonsil         | A          | 1:400    | 1 hour, RT                    |
| CD8 (Cytotoxic T-cells) | Novocastra        | 1A5   | Tonsil         | A          | 1:50     | 1 hour, RT                    |
| CD20 (B-cells)          | Novocastra        | L26   | Tonsil         | A          | 1:400    | 1 hour, RT                    |
| CD68 (Macrophages)      | Novocastra        | KP1   | Tonsil         | A          | 1:1600   | 1 hour, RT                    |

NA = Not applicable; AD = Alzheimer's disease; FTLD-TDP = Frontotemporal lobar degeneration with TDP-43 positive inclusions; MSA = Multiple system atrophy; FTLD-FUS = Frontotemporal lobar degeneration with FUS positive inclusions; CBD = Corticobasal degeneration; A = Acetone; PFA = 4% Paraformaldehyde; FA = Formic acid; PBS = Phosphate buffered saline; RT = Room temperature. Antibodies were directed at \* amino acids 243-441 irrespective of phosphorylation and \*\* phosphorylated Ser202.

1  
2  
3 **Supplementary Table 4 Definitions of pathological features**  
4  
5

6

| Pathological feature                         | Definition                                                                                                                                                                                                                                                                                                                                                                                                                                                                                                        |
|----------------------------------------------|-------------------------------------------------------------------------------------------------------------------------------------------------------------------------------------------------------------------------------------------------------------------------------------------------------------------------------------------------------------------------------------------------------------------------------------------------------------------------------------------------------------------|
| Rimmed vacuoles                              | Irregular vacuole with a granular basophilic rim or containing granular basophilic material when stained with H&E or stained red in the GT. Both H&E and GT stained sections were reviewed before concluding the absence of rimmed vacuoles.                                                                                                                                                                                                                                                                      |
| Inflammatory infiltrate and partial invasion | Inflammatory cells must show a nucleus fully circumscribed by a ring of positive staining. T-cells and B-cells must have a lymphoid morphology. Partial invasion was defined as unequivocal invasion of an otherwise structurally normal fibre by one or more inflammatory cells on H&E stained sections or sections stained using IHC.                                                                                                                                                                           |
| Protein aggregates                           | Area of definite staining within a transversely orientated muscle fibre. Diffuse staining affecting the whole of a fibre was not counted nor were protein aggregates in necrotic fibres or regenerating fibres.                                                                                                                                                                                                                                                                                                   |
| Congophilic deposits                         | Assessed using polarising and fluorescence microscopes. Positive staining using a polarising microscope was defined as congophilic deposits within a muscle fibre that exhibited apple-green birefringence under polarised light. Positive staining with a fluorescence microscope was defined as fluorescent material within a muscle fibre only visible under the rhodamine red filter. Areas of auto-fluorescence were excluded by visualising areas of fluorescence with both rhodamine red and FITC filters. |

7  
8  
9  
10  
11  
12  
13  
14  
15  
16  
17  
18  
19  
20  
21  
22  
23  
24

25  
26 GT = Gomori trichrome; FITC = Fluorescein isothiocyanate.  
27  
28  
29  
30  
31  
32  
33  
34  
35  
36  
37  
38  
39  
40  
41  
42  
43  
44  
45  
46  
47  
48  
49  
50  
51  
52  
53  
54  
55  
56  
57  
58  
59  
60

1  
2  
3  
4  
5  
6  
7  
8  
9  
10  
11  
12  
13  
14  
15  
16  
17  
18  
19  
20  
21  
22  
23  
24  
25  
26  
27  
28  
29  
30  
31  
32  
33  
34  
35  
36  
37  
38  
39  
40  
41  
42  
43  
44  
45  
46  
47  
48  
49  
50  
51  
52  
53  
54  
55  
56  
57  
58  
59  
60

**IBM Inflammatory Score Tool**

Case Number: \_\_\_\_\_ Date: \_\_\_\_\_

| Score                           |         | Description                                                                                                                                                                                                                                                                                                                                                                                    |
|---------------------------------|---------|------------------------------------------------------------------------------------------------------------------------------------------------------------------------------------------------------------------------------------------------------------------------------------------------------------------------------------------------------------------------------------------------|
| <b>T-cells (CD3)</b>            |         |                                                                                                                                                                                                                                                                                                                                                                                                |
| CD3+ endomysial infiltration    | 0, 1, 2 | For each inflammatory cell type in the endomysial, perimysial and perivascular locations score positive infiltrating cells as follows: if none or <4 cells in a x20 field- score 0; if >4 cells in a x20 field and/or 1 cluster (where a cluster is ≥10 cells) - score 1; if >2 clusters in the entire biopsy, and/or diffusely infiltrating cells (i.e. > 20 cells in a x20 field) - score 2. |
| CD3+ perimysial infiltration    | 0, 1, 2 |                                                                                                                                                                                                                                                                                                                                                                                                |
| CD3+ perivascular infiltration  | 0, 1, 2 |                                                                                                                                                                                                                                                                                                                                                                                                |
| <b>Helper T-cells (CD4)</b>     |         |                                                                                                                                                                                                                                                                                                                                                                                                |
| CD4+ endomysial infiltration    | 0, 1, 2 |                                                                                                                                                                                                                                                                                                                                                                                                |
| CD4+ perimysial infiltration    | 0, 1, 2 |                                                                                                                                                                                                                                                                                                                                                                                                |
| CD4+ perivascular infiltration  | 0, 1, 2 |                                                                                                                                                                                                                                                                                                                                                                                                |
| <b>Cytotoxic T-cells (CD8)</b>  |         |                                                                                                                                                                                                                                                                                                                                                                                                |
| CD8+ endomysial infiltration    | 0, 1, 2 |                                                                                                                                                                                                                                                                                                                                                                                                |
| CD8+ perimysial infiltration    | 0, 1, 2 |                                                                                                                                                                                                                                                                                                                                                                                                |
| CD8+ perivascular infiltration  | 0, 1, 2 |                                                                                                                                                                                                                                                                                                                                                                                                |
| <b>B-cells (CD20)</b>           |         |                                                                                                                                                                                                                                                                                                                                                                                                |
| CD20+ endomysial infiltration   | 0, 1, 2 |                                                                                                                                                                                                                                                                                                                                                                                                |
| CD20+ perimysial infiltration   | 0, 1, 2 |                                                                                                                                                                                                                                                                                                                                                                                                |
| CD20+ perivascular infiltration | 0, 1, 2 |                                                                                                                                                                                                                                                                                                                                                                                                |
| <b>Macrophages (CD68)</b>       |         |                                                                                                                                                                                                                                                                                                                                                                                                |
| CD68+ endomysial infiltration   | 0, 1, 2 |                                                                                                                                                                                                                                                                                                                                                                                                |
| CD68+ perimysial infiltration   | 0, 1, 2 |                                                                                                                                                                                                                                                                                                                                                                                                |
| CD68+ perivascular infiltration | 0, 1, 2 |                                                                                                                                                                                                                                                                                                                                                                                                |
| MHC Class I                     | 0, 1, 2 | For the whole biopsy score as follows: normal (capillary staining only) - score 0; if increased: i) mildly (weak diffuse sarcolemmal staining or scattered positive muscle fibres) - score 1; ii) strongly increased (diffuse definite sarcoplasmic and sarcolemmal increase in staining) score 2.                                                                                             |

Supplementary Figure 1 IBM inflammatory score-tool  
 Score tool modified from the published juvenile dermatomyositis inflammatory (JDM) score tool [17] to specifically assess the type, degree and distribution of inflammation in IBM. The inflammatory domain was augmented to include T-cells, T-cell subtypes, B-cells and macrophages. MHC Class I staining was expanded to include three patterns of labelling. The vascular, muscle fibre and connective tissue domains which are present in the JDM score tool were not included.

188x255mm (300 x 300 DPI)

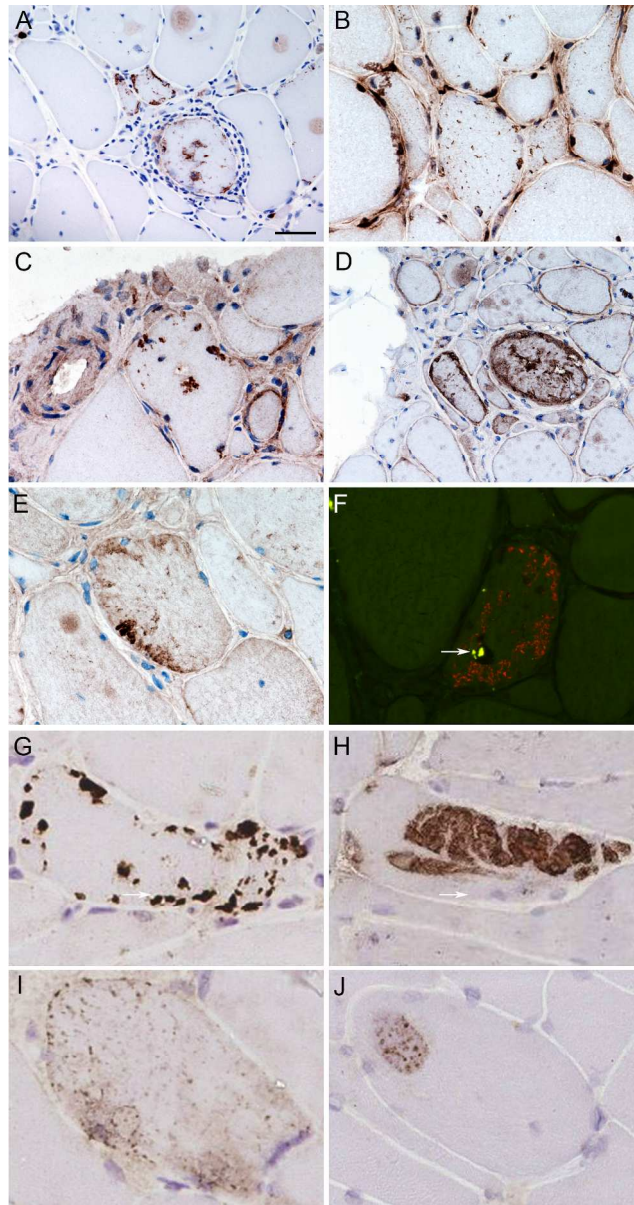

Figure 1 Protein aggregates and congophilic deposits in IBM

Stained cryostat sections, showing fibres, often in clusters, containing protein aggregates stained for p62 (A), TDP-43 (B), ubiquitin (C),  $\alpha$ B-crystallin (D) and myotilin (E). Protein aggregates were present throughout fibres, and were observed in apparently normal fibres, vacuolated fibres and fibres surrounded by inflammatory infiltrates. In fibres containing TDP-43 aggregates, myonuclear TDP-43 staining was frequently reduced (B). Congophilic deposits were observed in vacuolated fibres using epifluorescence (F).

Tissue sections were examined using both the rhodamine red and fluorescein isothiocyanate filters to exclude areas of auto-fluorescence (arrow). Combined fluorescent image is shown. Four patterns of immunoreactivity were observed in IBM and disease controls stained for p62 using IHC (G)(H)(I)(J). Pattern I (G) - strongly stained, discrete and clearly delineated, round or angular aggregates, variable in number and size within a muscle fibre but rarely filling it and predominantly located subsarcolemmal, but also perinuclear and adjacent to vacuoles. Pattern II (H) - large aggregates of variable staining intensity. Pattern III (I) - fine granular aggregates dispersed throughout the fibre. Pattern IV (J) - fine granules and wisps of

1  
2  
3 p62 immunoreactivity set within weakly basophilic inclusions.  
4 Scale bar represents 50  $\mu\text{m}$  in A and D; 25  $\mu\text{m}$  in B, C and E-J.

5  
6 161x305mm (300 x 300 DPI)  
7  
8  
9  
10  
11  
12  
13  
14  
15  
16  
17  
18  
19  
20  
21  
22  
23  
24  
25  
26  
27  
28  
29  
30  
31  
32  
33  
34  
35  
36  
37  
38  
39  
40  
41  
42  
43  
44  
45  
46  
47  
48  
49  
50  
51  
52  
53  
54  
55  
56  
57  
58  
59  
60

For peer review only

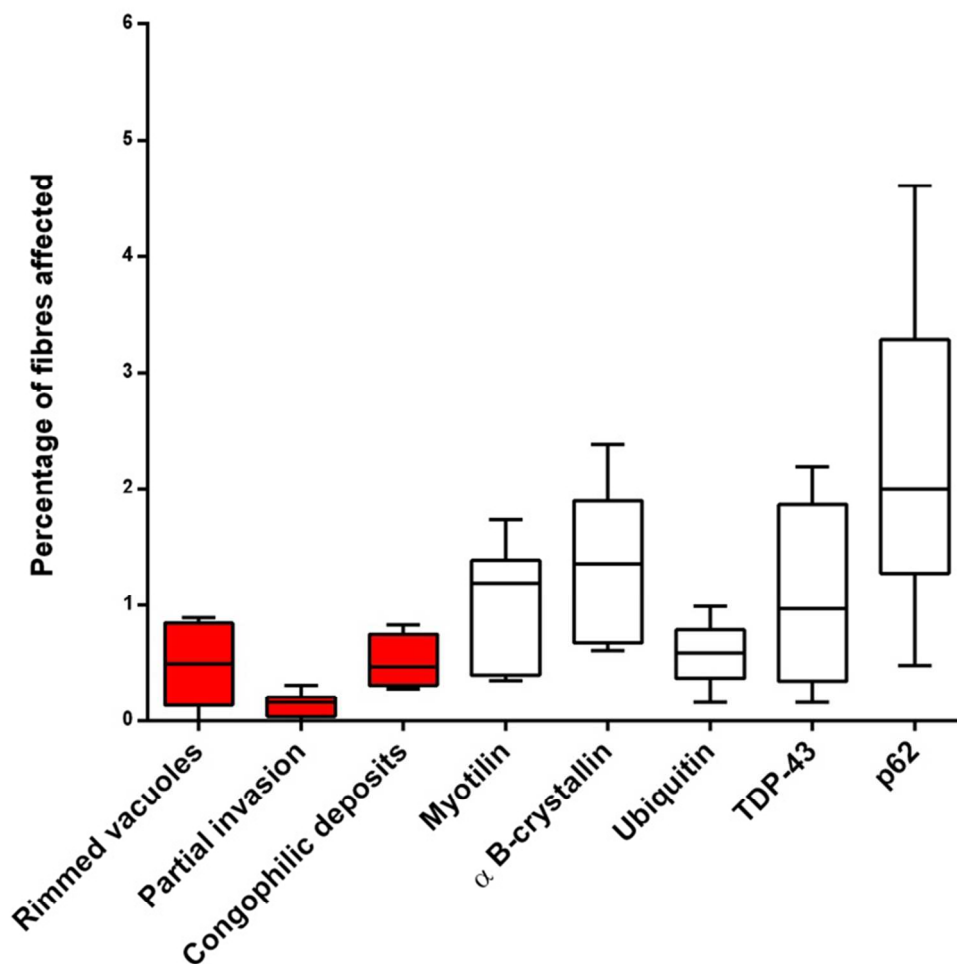

Figure 2 Percentage of muscle fibres containing protein aggregates and Griggs' pathological features Box and whisker plot illustrating the percentage of muscle fibres containing pathological abnormalities contained in the Griggs criteria and protein aggregates in Griggs' pathologically-definite IBM. Fibres containing aggregates immunoreactive for p62 and  $\alpha$ B-crystallin were more frequent than those containing the current diagnostic pathological features (red bars) ( $p < 0.05$ ). Protein aggregates recognised by all antibodies were found in a significantly larger number of fibres than partial invasion ( $p < 0.02$ ).

97x99mm (300 x 300 DPI)

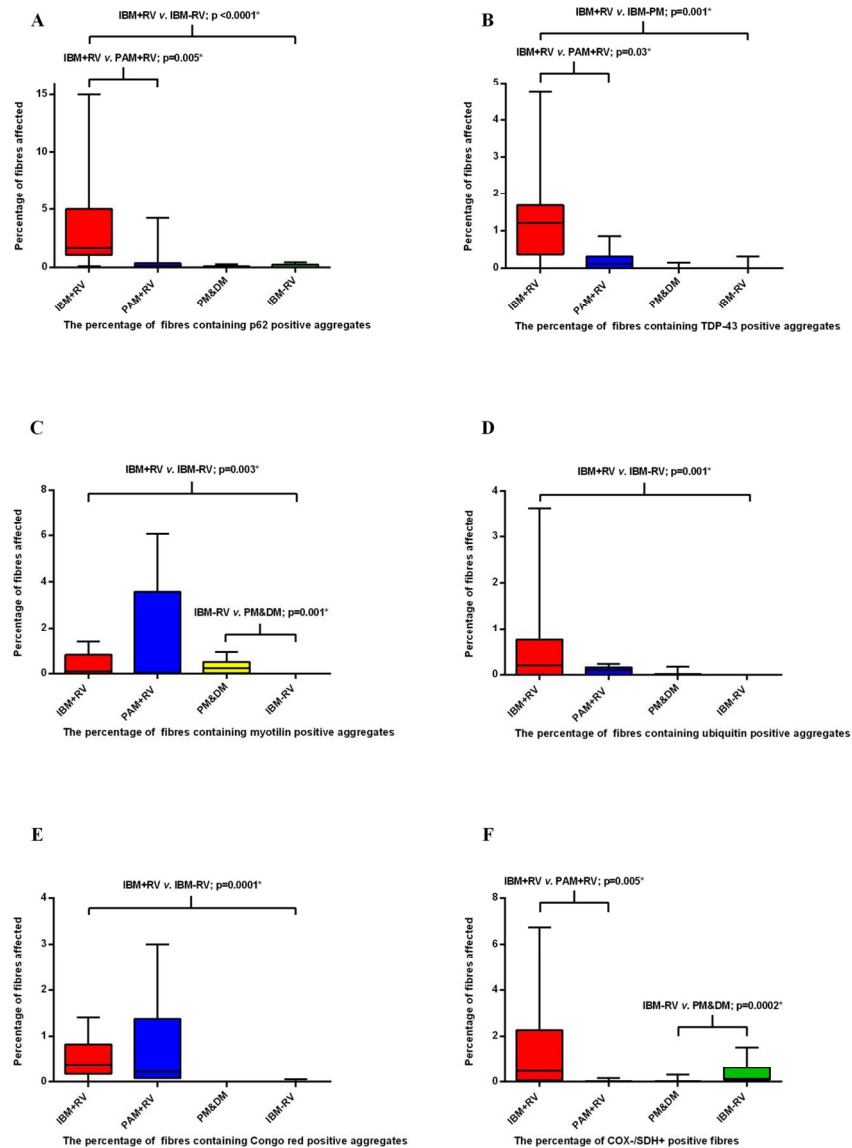

Figure 3 Percentage of fibres containing protein aggregates and COX-/SDH+ fibres in each group. Box and whisker plots illustrating the percentage of fibres in each diagnostic category containing p62 (A), TDP-43 (B), myotilin (C) and ubiquitin (D) immunoreactive aggregates, congophilic deposits (E) and COX-/SDH+ fibres (F). All protein aggregates were present in a greater percentage of fibres in IBM+RV than in IBM-RV. There was no difference in the percentage of COX-/SDH+ muscle fibres between these groups. IBM+RV biopsies had a greater percentage of fibres containing p62 (A) and TDP-43 (B) immunoreactive aggregates and COX-/SDH+ fibres (F) than PAM. Pathological findings were similar in IBM-RV and PM&DM, with no differences in the percentage of fibres containing p62 (A), TDP-43 (B) and ubiquitin (D) immunoreactive aggregates or congophilic deposits (E). However, there was a greater percentage of COX-/SDH+ fibres (F) in IBM-RV than PM&DM and a greater percentage of fibres containing myotilin immunoreactive aggregates (C) in PM&DM than IBM-RV. \*Statistically significant results.

168x226mm (300 x 300 DPI)

1  
2  
3  
4  
5  
6  
7  
8  
9  
10  
11  
12  
13  
14  
15  
16  
17  
18  
19  
20  
21  
22  
23  
24  
25  
26  
27  
28  
29  
30  
31  
32  
33  
34  
35  
36  
37  
38  
39  
40  
41  
42  
43  
44  
45  
46  
47  
48  
49  
50  
51  
52  
53  
54  
55  
56  
57  
58  
59  
60

For peer review only



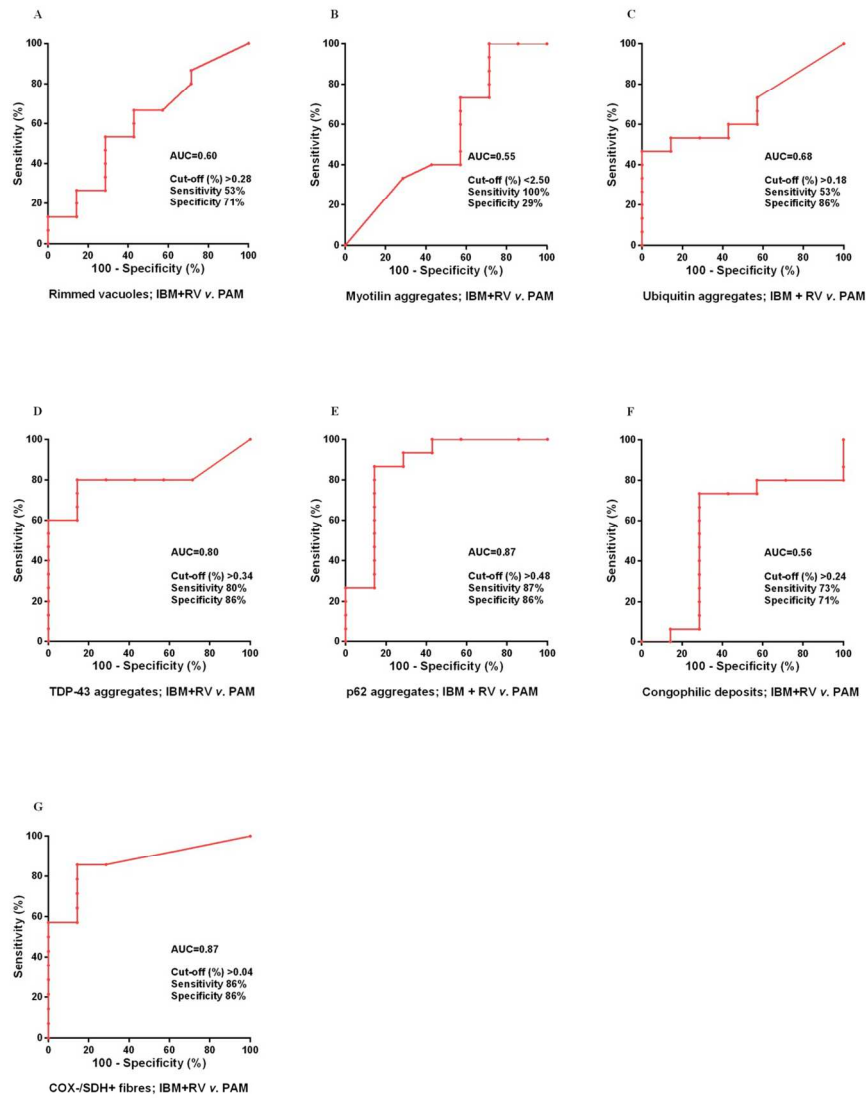

Supplementary Figure 2 Sensitivity and specificity of rimmed vacuoles, protein aggregates and mitochondrial changes in IBM+RV compared to PAM

Receiver operating characteristic curves for each test including the area under the curve and optimum cut-off with its associated sensitivity and specificity for rimmed vacuoles (A), myotilin (B), ubiquitin (C), TDP-43 (D), p62 (E) immunoreactive deposits, congophilic deposits (F) and COX-/SDH+ fibres (G). COX/SDH HC staining was the most discriminative test for differentiating IBM+RV and PAM (G). However, there was little difference between COX/SDH HC staining, TDP-43 and p62 IHC staining and none were sufficiently discriminative to be considered diagnostic. AUC = Area under the curve.

165x211mm (300 x 300 DPI)

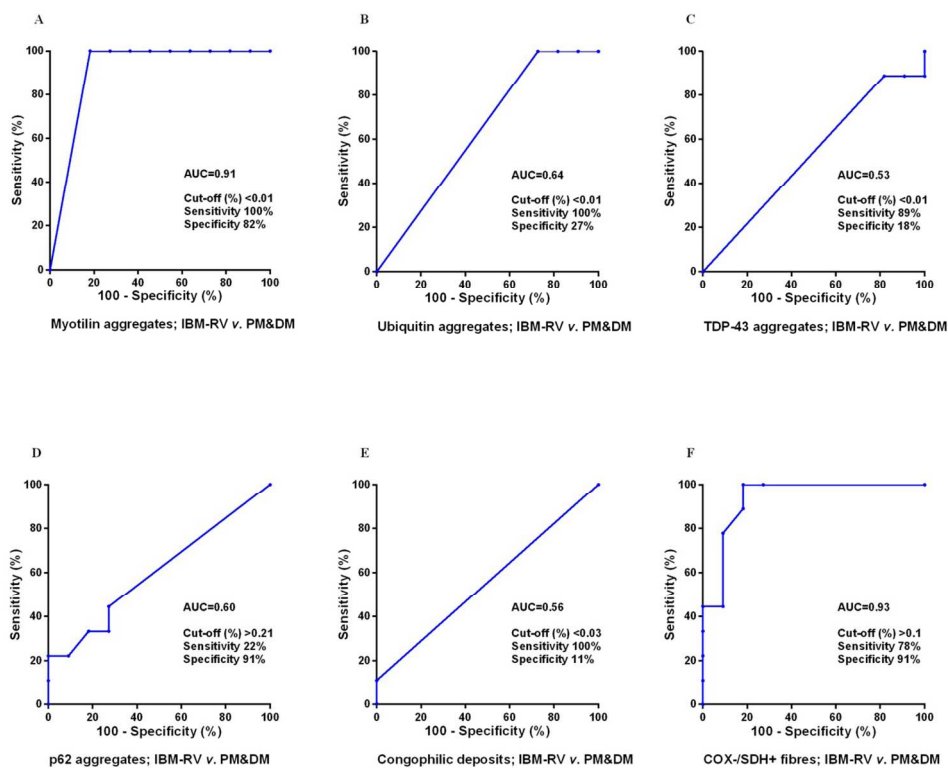

Supplementary Figure 3 Sensitivity and specificity of protein aggregates and mitochondrial changes in IBM-RV compared to PM&DM

Receiver operating characteristic curves for each test showing the area under the curve and optimum cut-off with its sensitivity and specificity for myotilin (A), ubiquitin (B), TDP-43 (C), p62 (D) immunoreactive deposits, congophilic deposits (E) and COX-/SDH+ fibres (F). COX/SDH histochemical staining (F) and myotilin (G) IHC were the most discriminative tests for differentiating IBM-RV and PM&DM. AUC = Area under the curve.

170x139mm (300 x 300 DPI)

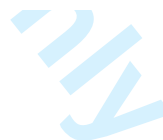

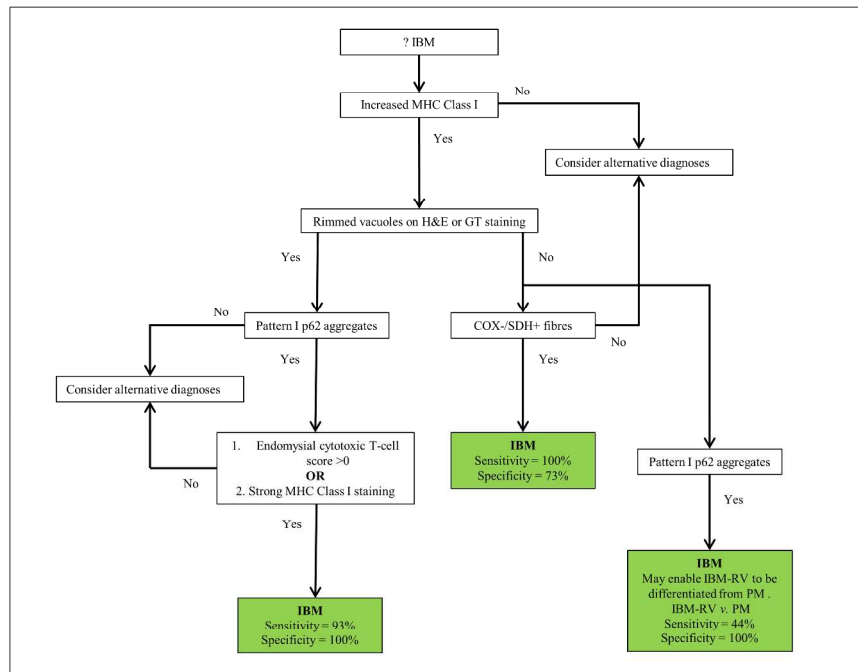

Figure 4 Proposed diagnostic algorithm for IBM based on pathological findings

Flow diagram showing a proposed pathway for diagnosing IBM based on the pathological findings. Increased MHC Class I staining was observed in all cases of IBM and pattern I p62 aggregates in all cases of IBM+RV making them good initial screening tests. Their absence rules-out a diagnosis of IBM and IBM+RV respectively. The presence of an endomysial cytotoxic T-cell score >0 or strong MHC Class I staining in a biopsy with rimmed vacuoles and p62 aggregates secures a diagnosis of IBM+RV. Differentiating IBM-RV and PM&DM pathologically is more challenging. The presence of COX-/SDH+ fibres is not specific to IBM-RV. However, an absence of COX-/SDH+ fibres effectively rules-out a diagnosis of IBM-RV. Pattern I p62 aggregates may enable IBM to be differentiated from PM when present. However, they may lack sensitivity for IBM-RV, therefore their absence does not rule out the diagnosis.

254x190mm (300 x 300 DPI)

**STARD checklist for reporting of studies of diagnostic accuracy**  
(version January 2003)

| Section and Topic           | Item # |                                                                                                                                                                                                 | On page #                                                                                                                                             |
|-----------------------------|--------|-------------------------------------------------------------------------------------------------------------------------------------------------------------------------------------------------|-------------------------------------------------------------------------------------------------------------------------------------------------------|
| TITLE/ABSTRACT/<br>KEYWORDS | 1      | Identify the article as a study of diagnostic accuracy (recommend MeSH heading 'sensitivity and specificity').                                                                                  | Pg 1,2                                                                                                                                                |
| INTRODUCTION                | 2      | State the research questions or study aims, such as estimating diagnostic accuracy or comparing accuracy between tests or across participant groups.                                            | Pg 2-4                                                                                                                                                |
| <b>METHODS</b>              |        |                                                                                                                                                                                                 |                                                                                                                                                       |
| <i>Participants</i>         | 3      | The study population: The inclusion and exclusion criteria, setting and locations where data were collected.                                                                                    | Pg 4 and<br>Supplementary<br>Tables 1 and 2                                                                                                           |
|                             | 4      | Participant recruitment: Was recruitment based on presenting symptoms, results from previous tests, or the fact that the participants had received the index tests or the reference standard?   | Both. Pg 4 and<br>Supplementary Table<br>2                                                                                                            |
|                             | 5      | Participant sampling: Was the study population a consecutive series of participants defined by the selection criteria in item 3 and 4? If not, specify how participants were further selected.  | Patients identified<br>from clinics and<br>systematic search of<br>pathological<br>databases                                                          |
|                             | 6      | Data collection: Was data collection planned before the index test and reference standard were performed (prospective study) or after (retrospective study)?                                    | Retrospective study                                                                                                                                   |
| <i>Test methods</i>         | 7      | The reference standard and its rationale.                                                                                                                                                       | Clinical features and<br>follow-up                                                                                                                    |
|                             | 8      | Technical specifications of material and methods involved including how and when measurements were taken, and/or cite references for index tests and reference standard.                        | Pg 4-6 and<br>Supplementary Table<br>3                                                                                                                |
|                             | 9      | Definition of and rationale for the units, cut-offs and/or categories of the results of the index tests and the reference standard.                                                             | Pg 6                                                                                                                                                  |
|                             | 10     | The number, training and expertise of the persons executing and reading the index tests and the reference standard.                                                                             | Two qualified<br>medical doctors.<br>Neuropathologist and<br>Neurologist with an<br>interest and<br>significant<br>experience in muscle<br>pathology. |
|                             | 11     | Whether or not the readers of the index tests and reference standard were blind (masked) to the results of the other test and describe any other clinical information available to the readers. | All analyses were<br>blinded and<br>performed in a<br>random order. No<br>clinical information<br>was available at the<br>time of analyses.           |
| <i>Statistical methods</i>  | 12     | Methods for calculating or comparing measures of diagnostic accuracy, and the statistical methods used to quantify uncertainty (e.g. 95% confidence intervals).                                 | Pg 6 includes tests<br>for determining<br>diagnostic accuracy<br>including 2x2 tables<br>and ROC curves.                                              |
|                             | 13     | Methods for calculating test reproducibility, if done.                                                                                                                                          | Bland-Altman plots<br>and Cohen's Kappa<br>statistic used.                                                                                            |
| <b>RESULTS</b>              |        |                                                                                                                                                                                                 |                                                                                                                                                       |
| <i>Participants</i>         | 14     | When study was performed, including beginning and end dates of recruitment.                                                                                                                     | 2011-2013                                                                                                                                             |
|                             | 15     | Clinical and demographic characteristics of the study population (at least information on age, gender, spectrum of presenting symptoms).                                                        | Included in<br>Supplementary Table<br>1                                                                                                               |

|                     |    |                                                                                                                                                                                                                                                     |                                                                                                                                                                   |
|---------------------|----|-----------------------------------------------------------------------------------------------------------------------------------------------------------------------------------------------------------------------------------------------------|-------------------------------------------------------------------------------------------------------------------------------------------------------------------|
|                     | 16 | The number of participants satisfying the criteria for inclusion who did or did not undergo the index tests and/or the reference standard; describe why participants failed to undergo either test (a flow diagram is strongly recommended).        | Not applicable.<br>Retrospective study.                                                                                                                           |
| <i>Test results</i> | 17 | Time-interval between the index tests and the reference standard, and any treatment administered in between.                                                                                                                                        | Study performed using tissue taken at the time of the reference standard                                                                                          |
|                     | 18 | Distribution of severity of disease (define criteria) in those with the target condition; other diagnoses in participants without the target condition.                                                                                             | Diagnoses of control cases included<br>Supplementary Table 2                                                                                                      |
|                     | 19 | A cross tabulation of the results of the index tests (including indeterminate and missing results) by the results of the reference standard; for continuous results, the distribution of the test results by the results of the reference standard. | Tables 1 and 2                                                                                                                                                    |
|                     | 20 | Any adverse events from performing the index tests or the reference standard.                                                                                                                                                                       | Not applicable.                                                                                                                                                   |
| <i>Estimates</i>    | 21 | Estimates of diagnostic accuracy and measures of statistical uncertainty (e.g. 95% confidence intervals).                                                                                                                                           | Included in Tables 1 and 2 and Supplementary Figures 2 and 3                                                                                                      |
|                     | 22 | How indeterminate results, missing data and outliers of the index tests were handled.                                                                                                                                                               | Only one missing result and this is documented in Table 2. The denominator for calculating the proportion was altered to account for missing case in calculations |
|                     | 23 | Estimates of variability of diagnostic accuracy between subgroups of participants, readers or centers, if done.                                                                                                                                     | Included in statistical analysis Pg 6                                                                                                                             |
|                     | 24 | Estimates of test reproducibility, if done.                                                                                                                                                                                                         | Included in statistical analysis Pg 6                                                                                                                             |
| DISCUSSION          | 25 | Discuss the clinical applicability of the study findings.                                                                                                                                                                                           | Discussed in discussion Pg 12-15                                                                                                                                  |

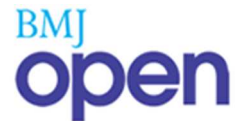

**A retrospective cohort study identifying the principal pathological features useful in the diagnosis of inclusion body myositis**

|                                 |                                                                                                                                                                                                                                                                                          |
|---------------------------------|------------------------------------------------------------------------------------------------------------------------------------------------------------------------------------------------------------------------------------------------------------------------------------------|
| Journal:                        | <i>BMJ Open</i>                                                                                                                                                                                                                                                                          |
| Manuscript ID:                  | bmjopen-2013-004552.R1                                                                                                                                                                                                                                                                   |
| Article Type:                   | Research                                                                                                                                                                                                                                                                                 |
| Date Submitted by the Author:   | 18-Feb-2014                                                                                                                                                                                                                                                                              |
| Complete List of Authors:       | Brady, Stefen; MRC Centre for Neuromuscular Diseases, Division of Neuropathology<br>Squier, Waney<br>Sewry, Caroline<br>Hanna, Mike<br>Hilton-Jones, David<br>Holton, Janice; UCL Institute of Neurology, Department of Molecular Neuroscience and MRC Centre for Neuromuscular Diseases |
| <b>Primary Subject Heading</b>: | Neurology                                                                                                                                                                                                                                                                                |
| Secondary Subject Heading:      | Diagnostics                                                                                                                                                                                                                                                                              |
| Keywords:                       | NEUROLOGY, Adult neurology < NEUROLOGY, Neuromuscular disease < NEUROLOGY, Neuropathology < PATHOLOGY                                                                                                                                                                                    |
|                                 |                                                                                                                                                                                                                                                                                          |

SCHOLARONE™  
Manuscripts

only

1  
2  
3 **A retrospective cohort study identifying the principal pathological features useful in the**  
4 **diagnosis of inclusion body myositis**  
5  
6  
7  
8

9 Corresponding author:

10 Dr Janice L Holton

11 Department of Molecular Neuroscience, UCL Institute of Neurology, Queen Square, London, UK.

12 janice.holton@ucl.ac.uk; tel: 00 44 (0)20 3448 4239; fax: 00 44 (0)20 3448 4486.  
13  
14  
15  
16  
17  
18

19 Authors:

20 Stefen Brady<sup>1</sup>, Waney Squier<sup>2</sup>, Caroline Sewry<sup>3,4</sup>, Michael Hanna<sup>1</sup>, David Hilton-Jones<sup>5</sup>, Janice L  
21 Holton<sup>6</sup>  
22  
23  
24  
25  
26

27 <sup>1</sup>MRC Centre for Neuromuscular Diseases, UCL Institute of Neurology and National Hospital for  
28 Neurology, Neurosurgery, Queen Square, London, UK.

29 <sup>2</sup>Department of Neuropathology, University of Oxford, John Radcliffe Hospital, Oxford, UK.

30 <sup>3</sup>Dubowitz Neuromuscular Centre, Institute of Child Health and Great Ormond Street Hospital for  
31 Children, London, UK.  
32  
33  
34  
35  
36

37 <sup>4</sup>Wolfson Centre of Inherited Neuromuscular Diseases, RJA Orthopaedic Hospital, Oswestry, UK.

38 <sup>5</sup>Nuffield Department of Clinical Neurosciences (Clinical Neurology), University of Oxford, John  
39 Radcliffe Hospital, Oxford, UK.  
40  
41  
42  
43

44 <sup>6</sup>Department of Molecular Neuroscience, UCL Institute of Neurology, Queen Square, London, UK.  
45  
46  
47  
48  
49

50 Keywords: Neurology, adult neurology, neuromuscular disease, neuropathology

51 Running title: Pathological criteria for inclusion body myositis

52 Word count: 2990  
53  
54  
55  
56  
57  
58  
59  
60

## ABSTRACT

### Objectives

The current pathological diagnostic criteria for sporadic inclusion body myositis (IBM) lack sensitivity. Using immunohistochemical techniques abnormal protein aggregates have been identified in IBM, including some associated with neurodegenerative disorders. Our objective was to investigate the diagnostic utility of a number of markers of protein aggregates together with mitochondrial and inflammatory changes in IBM.

### Design

Retrospective cohort study. The sensitivity of pathological features was evaluated in cases of Griggs' definite IBM. The diagnostic potential of the most reliable features was then assessed in clinically-typical IBM with rimmed vacuoles ( $n=15$ ) and clinically-typical IBM without rimmed vacuoles ( $n=9$ ) and IBM mimics - vacuolar myopathies ( $n=7$ ) and steroid-responsive inflammatory myopathies ( $n=11$ ).

### Setting

Specialist muscle services at the John Radcliffe Hospital, Oxford and the National Hospital for Neurology and Neurosurgery, London.

### Results

Individual pathological features, in isolation, lacked sensitivity and specificity. However, the morphology and distribution of p62 aggregates in IBM were characteristic and in a myopathy with rimmed vacuoles, the combination of characteristic p62 aggregates and increased sarcolemmal and internal MHC Class I expression or endomysial T-cells were diagnostic for IBM with a sensitivity of 93% and specificity of 100%. In an inflammatory myopathy lacking rimmed vacuoles, the presence of mitochondrial changes was 100% sensitive and 73% specific for IBM; characteristic p62 aggregates were specific (91%), but lacked sensitivity (44%).

### Conclusions

We propose an easily applied diagnostic algorithm for the pathological diagnosis of IBM.

Additionally our findings support the hypothesis that many of the pathological features considered



1  
2  
3 typical of IBM develop later in the disease, explaining their poor sensitivity at disease presentation  
4  
5 and emphasising the need for revised pathological criteria to supplement the clinical criteria in the  
6  
7 diagnosis of IBM.  
8  
9

## 10 11 **STRENGTHS AND LIMITATIONS**

12  
13 The present study is a multicentre retrospective evaluation of the diagnostic utility of pathological  
14  
15 findings for differentiating IBM from myopathies important in the differential diagnosis – myopathies  
16  
17 containing rimmed vacuoles and steroid-responsive inflammatory myopathies.  
18  
19

20  
21 The main strength of our study was the systematic detailed analysis of well-defined cases. This  
22  
23 enabled us to determine the sensitivity and specificity of individual pathological features and produce  
24  
25 an easily applied pathological diagnostic algorithm for IBM for use in clinical practice.  
26  
27

28  
29 Study limitations include the small number of cases and the retrospective design. Further prospective  
30  
31 studies are now required in larger cohorts of patients.  
32  
33  
34  
35  
36  
37  
38  
39  
40  
41  
42  
43  
44  
45  
46  
47  
48  
49  
50  
51  
52  
53  
54  
55  
56  
57  
58  
59  
60

## INTRODUCTION

Sporadic inclusion body myositis (IBM) is the commonest acquired myopathy in those aged over 50 years.[1] Although classified as an idiopathic inflammatory myopathy, muscle biopsy reveals both degenerative and inflammatory features. The widely used Griggs diagnostic criteria require the presence of several pathological findings,[2] namely rimmed vacuoles, an inflammatory infiltrate with invasion of non-necrotic fibres by mononuclear inflammatory cells (partial invasion), and either amyloid deposits or 15-18 nm tubulofilaments identified by electron microscopy (EM). Although these features in combination are highly specific for IBM, individually they occur in other myopathies, including some important in the differential diagnosis for IBM.[3-7] Moreover, cases of clinically-typical IBM have been reported where the combination of these pathological features is absent causing diagnostic difficulty.[8-11]

Over the last two decades, pathological accumulation of many different proteins has been reported in muscle fibres in IBM.[12] Proteins typically associated with neurodegenerative diseases such as  $\beta$ -amyloid ( $A\beta$ ), hyperphosphorylated tau and ubiquitin and newer neurodegenerative markers such as p62 and transactivation response DNA binding protein-43 (TDP-43) have been identified, as well as proteins associated with myofibrillar myopathies (MFM), including desmin and  $\alpha$ B-crystallin. However, not all observations have been consistently reproduced.[13,14] Mitochondrial changes have also been proposed for inclusion in IBM diagnostic criteria,[15]. Clear guidelines for the incorporation of immunohistochemical findings and mitochondrial changes into diagnostic criteria for IBM have not been established.[16]

Previously, we have shown that the characteristic pattern of weakness associated with IBM is indicative of the diagnosis, even if Griggs pathological features are absent.[11] However, it is not invariably found at presentation. Here we sought to identify which pathological features, other than the Griggs pathological criteria, add further support to the diagnosis of IBM. We systematically investigated which pathological features are present in Griggs pathologically-definite IBM and then

1  
2  
3 established the diagnostic utility of these features in cases of IBM lacking the Griggs criteria, using  
4 myopathies considered in the differential diagnosis of IBM as controls.  
5  
6  
7

## 8 9 **MATERIALS AND METHODS**

10  
11 The study received ethical approval from the Departments of Research and Development at Oxford  
12 University Hospitals NHS Trust, Oxford and University College London Hospitals NHS Foundation  
13 Trust, London.  
14  
15  
16  
17  
18  
19  
20  
21  
22  
23  
24

### 25 **Cases**

26  
27 All patients were followed by specialist muscle services at the John Radcliffe Hospital, Oxford and  
28 the National Hospital for Neurology and Neurosurgery, London. Biopsies were taken for diagnostic  
29 purposes from the deltoid or quadriceps muscles and prior to any treatment.  
30  
31  
32  
33  
34

35  
36 Methods for demonstrating pathological features in IBM, additional to those defined by the Griggs  
37 criteria, were determined in six Griggs pathologically-definite cases of IBM. Cases with no clinical or  
38 pathological evidence of neuromuscular disease were used as controls. The diagnostic utility of the  
39 pathological features identified was assessed in two groups of clinically-typical IBM; one with  
40 rimmed vacuoles on muscle biopsy (IBM+RV;  $n=15$ ), the other without rimmed vacuoles on muscle  
41 biopsy (IBM-RV;  $n=9$ ). Disease controls were cases of steroid-responsive inflammatory myopathies  
42 [polymyositis and dermatomyositis; (PM&DM);  $n=11$ ] and protein accumulation myopathies with  
43 rimmed vacuoles (PAM;  $n=7$ ). Clinical characteristics and inclusion criteria are summarised in  
44 Supplementary tables 1 and 2. Tissue from brains donated to the Queen Square Brain Bank for  
45 Neurological Disorders was used as positive controls for protein aggregate staining.  
46  
47  
48  
49  
50  
51  
52  
53  
54  
55  
56  
57  
58  
59  
60

### Muscle biopsies

Muscles biopsies were snap frozen at the time of surgery in isopentane cooled liquid nitrogen. Until sectioning all samples were stored at -80°C. Serial tissue sections were cut to a thickness of 8 µm, allowed to air dry and stored at -80°C until staining. Prior to staining, tissue sections were allowed to dry at room temperature. Tissue sections were stained with haematoxylin and eosin (H&E), combined cytochrome oxidase (COX) succinate dehydrogenase (SDH) histochemistry and for amyloid using alkalised Congo red, crystal violet and thioflavin S. Tissue sections for immunohistochemical staining were fixed for 10 minutes, if required, washed for five minutes in running water and incubated in 0.5% hydrogen peroxide to block endogenous peroxidase for 20 minutes. After further washing, tissue sections were incubated in 5% normal goat serum (Vector Laboratories, Burlingame, California) for 30 minutes and then systematically stained for: 1) proteins classically associated with neurodegenerative disease: tau and hyperphosphorylated tau, ubiquitin, Aβ and α-synuclein; 2) proteins more recently reported in neurodegenerative disease: p62, TDP-43, fused in sarcoma protein (FUS) and valosin containing protein (VCP); 3) nuclear membrane proteins: lamin A/C and emerin; 4) proteins associated with MFM: desmin, myotilin and αB-crystallin; and 5) inflammatory cells and major histocompatibility complex class I (MHC Class I): CD3+ T-cells, CD4+ T-cells, CD8+ T-cells, B-cells and macrophages. Primary antibody binding was visualised using Dako REAL™ EnVision™ Detection System which contains horse-radish peroxidase (HRP) labelled goat anti-rabbit/mouse secondary and 3,3'-diaminobenzidine (DAB); following incubation with the relevant primary antibody, tissue sections were washed in phosphate buffered saline (PBS), incubated with HRP labelled goat anti-rabbit/mouse secondary for 30 minutes, washed in PBS and incubated in a 1:50 solution of DAB for three to five minutes. Details of commercial antibodies and conditions used are provided in Supplementary Table 3. IHC for each antibody was performed on all cases simultaneously and including positive and negative controls (Supplementary Figure 1).

### Definitions and quantification

The total number of fibres and the number undergoing partial invasion, containing rimmed vacuoles, protein aggregates and COX-negative SDH-positive (COX-/SDH+) fibres were quantified using ImagePro version 6.2 (Media Cybernetics), to ensure that the whole biopsy was systematically analysed. Only transversely-orientated fibres not undergoing necrosis or regeneration were quantified. Tissue sections stained with Congo red were visualised under fluorescent and polarised light. Areas of fluorescence were examined using both rhodamine red (excitation 512-546 nm and emission 600-640 nm) and fluorescein isothiocyanate (excitation 440-480 nm and emission 527-530 nm) filters to exclude auto-fluorescence. Supplementary Table 4 provides definitions of the pathological features assessed. The inflammatory infiltrate and MHC Class I staining were analysed using a modified version of the semi-quantitative juvenile dermatomyositis score-tool (Supplementary Figure 2).[17] Assessments were performed blind to clinical details and diagnosis by a single individual (SB). Ten per cent of slides were re-counted to assess intra-observer reliability and 336 slides were assessed independently by two observers (SB and JLH) to determine inter-observer reliability.

### Statistical analysis

Statistical analyses were performed using GraphPad PRISM version 5. Continuous and categorical variables were compared using Mann Whitney *U*-test and chi-squared or Fisher's exact test respectively. Spearman's rank order correlation was used to determine the strength and direction of associations between pathological findings. Linear regression was used to determine relationships between clinical features and pathological findings. Test characteristics were calculated using receiver operating characteristic (ROC) curves and 2x2 contingency tables. A test was considered diagnostic when sensitivity >75% and specificity >95% or sensitivity >95% and specificity >75%. Intra-observer and inter-observer agreement was calculated using Bland-Altman plots and Cohen's kappa statistic ( $\kappa$ ). Repeat counts were within 95% confidence intervals using Bland-Altman plots and  $\kappa$  was  $\geq 0.7$  indicating good intra-observer and good or excellent inter-observer reliability. Statistical significance was set at  $p < 0.05$ .

## RESULTS

### Pathological findings in Griggs' pathologically-definite IBM

p62, TDP-43, ubiquitin, myotilin and  $\alpha$ B-crystallin immunoreactive aggregates were present in all six IBM cases but not in normal controls (Figures 1A-E). p62 and  $\alpha$ B-crystallin immunoreactive aggregates were present in a greater percentage of fibres than the pathological features required in the Griggs criteria ( $p < 0.05$ ) (Figure 2). Despite their abundance,  $\alpha$ B-crystallin immunoreactive aggregates were difficult to quantify due to a significant variability in their morphology. No immunoreactive deposits were observed in IBM cases or normal controls with antibodies to tau and phosphorylated tau, A $\beta$ ,  $\alpha$ -synuclein, desmin, emerin, lamin A/C, FUS or VCP. Alkalinised Congo red staining was more sensitive than crystal violet and thioflavin S staining for observing amyloid aggregates (Figure 1F). Tissue sections containing congophilic deposits identified under fluorescence light showed no apple-green birefringence under polarised light. Mitochondrial changes and increased sarcolemmal and sarcoplasmic MHC Class I staining were observed in all six IBM cases, but not in normal controls. The inflammatory infiltrate was predominantly composed of endomysial CD8+ T-cells and macrophages, with relatively few B-cells.

### Quantitative analysis of pathological features in IBM and disease controls

Having shown that p62, TDP-43, ubiquitin and myotilin aggregates, congophilic deposits, MHC Class I and inflammatory cells were prevalent in Griggs' pathologically-definite IBM, the presence of these abnormalities, together with mitochondrial changes were assessed in IBM+RV, IBM-RV and disease controls.

The percentage of fibres containing p62, TDP-43, myotilin and ubiquitin aggregates and congophilic deposits were greater in IBM+RV than in IBM-RV; there was no difference in the number of COX-/SDH+ fibres (Figure 3A-F). Protein aggregates were observed in morphologically-normal fibres and in fibres exhibiting Griggs' pathological features. p62 and TDP-43 positive aggregates were present in

1  
2  
3 a greater percentage of fibres in IBM+RV compared to PAM; however, there were no differences in  
4  
5 the percentage of fibres containing myotilin and ubiquitin aggregates or congophilic deposits. The  
6  
7 percentage of fibres containing p62, TDP-43 and ubiquitin aggregates or congophilic deposits were  
8  
9 similar in IBM-RV and PM&DM; however, myotilin aggregates were present in a greater percentage  
10  
11 of fibres in PM&DM and COX-/SDH+ fibres were more abundant in IBM-RV. Analysis of the total  
12  
13 inflammatory infiltrate (the sum of the semi-quantitative scores for T-cells, B-cells and macrophages)  
14  
15 in the endomysium, perimysium and perivascular areas revealed that there were greater numbers of  
16  
17 inflammatory cells in the endomysium and perimysium in IBM+RV than in PAM ( $p<0.03$ ). The same  
18  
19 analysis comparing the sum of the inflammatory cells in IBM-RV and PM&DM revealed that the  
20  
21 distribution and intensity of the inflammatory infiltrate was similar.  
22  
23  
24  
25  
26  
27  
28  
29  
30  
31

### 32 **Diagnostic utility of pathological features in IBM and disease controls**

33 To mimic the diagnostic difficulty encountered in clinical practice, the ability of each test to  
34  
35 differentiate between myopathies containing rimmed vacuoles (IBM+RV and PAM) and between  
36  
37 inflammatory myopathies (IBM-RV and PM&DM) was assessed.  
38  
39  
40  
41  
42

### 43 ***Diagnostic utility determined using receiver-operating characteristic curves***

44 Individually, the presence of p62 immunoreactive inclusions and COX-/SDH+ fibres had the highest  
45  
46 sensitivity and specificity for differentiating IBM+RV from PAM, (Supplementary Figure 3) (Table  
47  
48 1). Differentiating between IBM-RV and PM&DM, myotilin positive inclusions or COX-/SDH+  
49  
50 fibres had the highest sensitivity and specificity for IBM-RV (Supplementary Figure 4) (Table 1).  
51  
52 Only the presence of myotilin positive inclusions satisfied criteria to be considered suitable as a  
53  
54 diagnostic test (<0.01% of fibres containing myotilin aggregates had a sensitivity of 100% and  
55  
56 specificity of 82% for IBM-RV).  
57  
58  
59  
60

**Table 1 Test characteristics**

Table shows the area under the curve and optimum cut-off for each test with the accompanying sensitivity and specificity. AUC = Area under the curve.

| Test feature         | IBM+RV v. PAM |                                   |             |             | IBM-RV v. PM&DM |                                   |             |             |
|----------------------|---------------|-----------------------------------|-------------|-------------|-----------------|-----------------------------------|-------------|-------------|
|                      | AUC           | Cut-off<br>(% of affected fibres) | Sensitivity | Specificity | AUC             | Cut-off<br>(% of affected fibres) | Sensitivity | Specificity |
| Rimmed vacuoles      | 0.60          | >0.28                             | 0.53        | 0.71        | -               | -                                 | -           | -           |
| p62 aggregates       | 0.87          | >0.48                             | 0.87        | 0.86        | 0.60            | >0.21                             | 0.22        | 0.91        |
| TDP-43 aggregates    | 0.80          | >0.34                             | 0.80        | 0.86        | 0.53            | <0.01                             | 0.89        | 0.18        |
| Ubiquitin aggregates | 0.68          | >0.18                             | 0.53        | 0.85        | 0.64            | <0.01                             | 1.00        | 0.27        |
| Myotilin aggregates  | 0.55          | <0.25                             | 1.00        | 0.29        | 0.91            | <0.01                             | 1.00        | 0.82        |
| Congophilic deposits | 0.56          | >0.24                             | 0.73        | 0.71        | 0.56            | <0.03                             | 0.11        | 0.82        |
| COX-/SDH+ fibres     | 0.87          | >0.04                             | 0.86        | 0.86        | 0.93            | >0.1                              | 0.78        | 0.91        |



1  
2  
3 ***Diagnostic utility determined by comparing proportion of affected cases in each diagnostic group***  
4

5 In the aforementioned experiments, the number of fibres within each muscle biopsy was quantified.  
6  
7 However, this is impractical for routine clinical use. Thus, the proportions of affected cases in each  
8  
9 group were compared (Table 2). This revealed that neither staining for protein aggregates nor  
10  
11 congophilic deposits could differentiate between IBM+RV and PAM. The pathological findings in  
12  
13 IBM-RV and PM&DM were also similar, except that the absence of myotilin immunoreactive  
14  
15 aggregates was sensitive and specific for IBM-RV. COX-/SDH+ fibres were also suggestive of IBM-  
16  
17 RV; one or more COX-/SDH+ fibres had a sensitivity of 100% and specificity 73% for IBM-RV.  
18  
19

20  
21 Increased MHC Class I expression lacked specificity. However, strong (diffuse sarcolemmal and  
22  
23 sarcoplasmic) MHC Class I up-regulation was diagnostic for IBM+RV, differentiating it from PAM,  
24  
25 as were the presence of either endomysial CD3+ T-cell or CD4+ T-cell scores >1 or an endomysial  
26  
27 CD8+ T-cell score >0. Partial invasion was specific for IBM+RV, but lacked sensitivity. Although the  
28  
29 sum of the inflammatory infiltrate was similar in IBM-RV and PM&DM, analysis of the  
30  
31 inflammatory cell sub-types revealed greater numbers of perimysial CD3+ T-cells, CD8+ T-cells and  
32  
33 endomysial B-cells [were observed] in PM&DM than in IBM-RV ( $p \leq 0.02$ ), however, this was not  
34  
35 diagnostically useful. There was no difference in the proportion of cases with fibres undergoing  
36  
37 partial invasion between IBM-RV and PM&DM.  
38  
39  
40  
41  
42  
43  
44  
45  
46  
47  
48  
49  
50  
51  
52  
53  
54  
55  
56  
57  
58  
59  
60

**Table 2 Comparison of the proportion of positive cases in each group**

| Pathological features                | IBM+RV   | PAM     | IBM+RV v. PAM |             | IBM-RV  | PM&DM    | IBM-RV v. PM&DM |             | IBM+RV v. IBM-RV |
|--------------------------------------|----------|---------|---------------|-------------|---------|----------|-----------------|-------------|------------------|
|                                      | n (%)    | n (%)   | Sensitivity   | Specificity | n (%)   | n (%)    | Sensitivity     | Specificity | <i>p</i> value   |
| Number of cases                      | 15 (100) | 7 (100) |               |             | 9 (100) | 11 (100) |                 |             |                  |
| Aggregated proteins, n (%)           |          |         |               |             |         |          |                 |             |                  |
| p62                                  | 15 (100) | 6 (86)  | 1.00          | 0.14        | 4 (44)  | 3 (27)‡  | 0.40            | 0.72        | 0.003*           |
| TDP-43                               | 13 (87)  | 5 (71)  | 0.87          | 0.29        | 1 (11)  | 2 (18)‡  | 0.11            | 0.82        | 0.001*           |
| Ubiquitin                            | 11 (73)  | 4 (57)  | 0.73          | 0.43        | 0 (0)   | 3 (27)‡  | 0.00            | 0.73        | 0.001*           |
| Myotilin                             | 10 (67)  | 5 (71)  | 0.67          | 0.29        | 0 (0)   | 9 (82)   | 0.00            | 0.18        | 0.002*           |
| Congophilic deposits                 | 13 (87)  | 7 (100) | 0.87          | 0.00        | 1 (11)  | 0 (0)    | 0.11            | 1.00        | 0.001*           |
| COX-/SDH+ fibres†, n (%)             |          |         |               |             |         |          |                 |             |                  |
| Any                                  | 12 (86)  | 2 (29)  | 0.80          | 0.71        | 9 (100) | 3 (27)   | 1.00            | 0.73        | 0.5              |
| Inflammatory features, n (%)         |          |         |               |             |         |          |                 |             |                  |
| MHC Class I up-regulation            | 15 (100) | 3 (43)  | 1.00          | 0.57        | 9 (100) | 11 (100) | 1.00            | 0.00        | 1.00             |
| Strong MHC Class I up-regulation     | 14 (93)  | 0 (0)   | 0.93          | 1.00        | 9 (100) | 10 (91)  | 1.00            | 0.09        | 0.53             |
| Partial invasion                     | 10 (67)  | 0 (0)   | 0.67          | 1.00        | 3 (33)  | 2 (18)   | 0.33            | 0.82        | 0.11             |
| Endomysial CD3+ T-cell score >1      | 13 (87)  | 0 (0)   | 0.87          | 1.00        | 4 (44)  | 7 (64)   | 0.44            | 0.36        | 0.02*            |
| Endomysial CD4+ T-cell score >1      | 12 (80)  | 0 (0)   | 0.80          | 1.00        | 2 (22)  | 5 (45)   | 0.22            | 0.46        | 0.01*            |
| Endomysial CD8+ T-cell score >0      | 14 (93)  | 0 (0)   | 0.93          | 1.00        | 4 (44)  | 5 (45)   | 0.44            | 0.54        | 0.02*            |
| Endomysial CD68+ macrophage score >1 | 12 (80)  | 0 (0)   | 0.80          | 1.00        | 4 (44)  | 8 (73)   | 0.44            | 0.17        | 0.07             |

†In IBM with rimmed vacuoles  $n=14$ . ‡Pathological features present in DM, but not PM cases. \*Statistically significant results.

1  
2  
3 Because IBM-RV is more pathologically akin to PM than DM, analyses were repeated comparing  
4 IBM-RV and PM cases ( $n=6$ ). No p62, TDP-43 or ubiquitin immunoreactive aggregates were  
5  
6 observed in PM cases and the diagnostic utility of tests for differentiating between IBM-RV and PM  
7  
8 yielded similar results to prior analyses between IBM-RV and PM&DM.  
9  
10

### 11 12 13 ***Diagnostic utility of categorising the pattern of p62 staining*** 14

15 The pattern of p62 staining could be categorised into four distinct groups (Figure 1G-J). Aggregates  
16  
17 observed in IBM were present in vacuolated and non-vacuolated fibres and were strongly stained,  
18  
19 discreet and clearly delineated, round or angular and typically located subsarcolemmal, perinuclear  
20  
21 and peri-vacuolar (pattern I). This pattern was observed in every IBM case with p62 aggregates, one  
22  
23 (9%) case of DM and three (43%) cases of PAM (hereditary IBM, dystrophinopathy and genetically  
24  
25 undefined MFM). Defining the pattern of immunoreactivity increased the discriminative value of p62  
26  
27 IHC for differentiating IBM+RV from PAM; pattern I p62 aggregates compared to any p62  
28  
29 aggregates increased the specificity from 14% to 57%, with no loss of sensitivity. Differentiating  
30  
31 IBM-RV and PM&DM, pattern I p62 aggregates were highly specific (91%), but lacked sensitivity  
32  
33 (44%). Patterns II, III and IV were not observed in any IBM cases. Patterns II and III appeared to be  
34  
35 specific for PAM ( $n=2$ ; 26%), both were cases of myotilinopathy ( $n=2$ ; 67%), and DM ( $n=2$ ; 40%)  
36  
37 respectively. Pattern IV occurred in a genetically undefined case of MFM. No differences were  
38  
39 observed in the morphology of TDP-43, myotilin or ubiquitin aggregates between biopsies.  
40  
41  
42

### 43 44 **Clinicopathological correlation** 45

46 In IBM+RV, IBM-RV and pathologically-definite IBM, there were no correlations in individual  
47  
48 biopsies between pathological features. No relationships were identified between the pathological  
49  
50 findings and age at symptom onset, age at biopsy, disease duration or serum creatine kinase. The same  
51  
52 results were obtained when the IBM groups were analysed separately and as one.  
53  
54  
55  
56  
57  
58  
59  
60

### Proposed diagnostic algorithm

Based on our pathological findings, we propose a diagnostic algorithm for differentiating IBM from its disease mimics (Figure 4).

The algorithm was tested in a further 23 cases that fulfilled the criteria for IBM+RV ( $n=12$ ) and IBM-RV ( $n=11$ ). The algorithm correctly diagnosed 20 (87%) cases: 12 (100%) cases of IBM+RV and eight (73%) cases of IBM-RV. In IBM-RV, COX-/SDH+ fibres were present in 8 (73%) cases, pattern I p62 aggregates in 8 (73%) cases and both in 6 (55%) cases.

### DISCUSSION

While Griggs' pathological criteria have been accepted as diagnostic of IBM, many patients who, observed over time undoubtedly have IBM, lack one or more of the Griggs pathological features at presentation, even on repeat biopsy.[8,11] Despite IBM being associated with a characteristic pattern of finger flexor and knee extensor weakness, not all patients have this pattern at disease onset, and muscle biopsy remains an important tool in differentiating IBM from its mimics. We sought to determine which additional pathological features support a diagnosis of IBM, demonstrating that characteristic p62 immunoreactive aggregates, strong MHC Class I upregulation, endomysial CD3+ T-cell score >1, CD8+ T-cell score >0 and COX-/SDH+ fibres are features with sufficient sensitivity and specificity to differentiate IBM from pathologically similar myopathies and we propose an easily applied pathological algorithm for the diagnosis of IBM (Figure 4).

In agreement with previous studies, we observed p62,[18] TDP-43,[19] ubiquitin [13] and  $\alpha$ B-crystallin [20] immunoreactive aggregates and a predominantly endomysial inflammatory infiltrate [3] in Griggs pathologically-definite IBM. Diagnostic pathological studies of IBM have concentrated on differentiating IBM from other inflammatory myopathies and two recent quantitative studies have found that TDP-43 and markers of autophagy such as p62 and LC3 may be of diagnostic use.[21,22] However, in these studies only a fraction of each biopsy was analysed i.e. 200 fibres. We have found

1  
2  
3 this limited quantification does not correlate with the percentage of affected fibres in a biopsy nor  
4  
5 does it reflect the way in which a muscle biopsy is assessed. Additionally, studies have lacked  
6  
7 vacuolar myopathy control cases as it is believed that the inflammatory changes present in IBM  
8  
9 enable it to be easily differentiated from other vacuolar myopathies.[22] However, inflammatory  
10  
11 changes are frequently observed in muscular dystrophies and the degree of inflammatory change  
12  
13 necessary to confidently diagnose IBM is currently unknown.

14  
15  
16  
17 To mimic the typical diagnostic conundrums encountered in clinical practice, we evaluated the ability  
18  
19 of the pathological findings to differentiate IBM+RV from other vacuolar myopathies and IBM-RV  
20  
21 from steroid-responsive inflammatory myopathies. We found that quantitative analysis of protein  
22  
23 aggregates, congophilic deposits and COX-/SDH+ fibres was of limited diagnostic use. Analysing the  
24  
25 biopsies dichotomously and using a semi-quantitative score-tool revealed that increased MHC Class I  
26  
27 labelling was sensitive for IBM making it a good initial screening test, its absence excluding the  
28  
29 diagnosis. In agreement with an earlier study, we found p62 aggregates identified the largest number  
30  
31 of affected fibres in IBM.[23] Additionally, as a novel finding, the morphology and distribution of  
32  
33 p62 aggregates was characteristic in IBM. This characteristic pattern of p62 immunoreactive  
34  
35 aggregates was highly sensitive for IBM+RV (100%); their absence from a biopsy containing rimmed  
36  
37 vacuoles effectively ruling-out a diagnosis of IBM. We confirmed that the most diagnostically useful  
38  
39 pathological findings in IBM+RV were evidence of an immune mediated process; strong MHC Class  
40  
41 I staining, endomysial CD3+ T-cell score >1 or an endomysial CD8+ T-cell score >0 were diagnostic.  
42  
43 Having identified either of these features in a biopsy containing rimmed vacuoles no extra diagnostic  
44  
45 certainty was gained from observing partial invasion, COX-/SDH+ fibres or congophilic deposits.

46  
47  
48  
49 The most discriminative pathological tests for differentiating between IBM-RV and PM&DM were  
50  
51 COX/SDH staining and myotilin IHC. Consistent with a recent study,[9] we found the absence of  
52  
53 mitochondrial changes casts doubt on a diagnosis of IBM. There was no difference in the median age  
54  
55 between IBM-RV and PM&DM cases to account for the difference observed in COX-/SDH+ fibres.

1  
2  
3 The presence of myotilin and ubiquitin immunoreactive aggregates appeared to rule out a diagnosis of  
4 IBM-RV. However, we believe the presence of these features in IBM+RV indicates that they are  
5 unlikely to be diagnostically reliable features for differentiating between IBM-RV and steroid-  
6 responsive inflammatory myopathies. Although no pathological feature was able to differentiate IBM-  
7 RV from steroid responsive inflammatory myopathies with certainty the presence of characteristic  
8 p62 aggregates and the absence of COX-/SDH+ fibres may help in supporting and opposing a  
9 diagnosis of IBM-RV respectively. Pattern I p62 immunoreactive aggregates were only present in  
10 44% of the initial IBM-RV cases tested, but they were not observed in PM cases and were very rare in  
11 DM. Although pattern I p62 aggregates appear to lack sensitivity their specificity was 91% making  
12 their presence highly suggestive of a diagnosis of IBM-RV. However, we identified pattern I p62 in  
13 eight out of 11 (73%) further cases of IBM-RV that were assessed indicating a greater sensitivity and  
14 that p62 IHC warrants further investigation and validation in a larger, independent series. The  
15 diagnostic utility of the other patterns of p62 staining is uncertain. Although pattern II appeared to  
16 have some specificity for myotilinopathy the small number of cases makes it drawing any conclusion  
17 problematic. In addition to p62 other autophagic proteins have been found in IBM and suggested as  
18 diagnostic markers. [22] Autophagy is a cellular mechanism for degrading and recycling cellular  
19 proteins and organelles and therefore, altered autophagy could lead to the accumulation of abnormal  
20 mitochondria and misfolded aggregation-prone proteins and may also result in altered antigen  
21 presentation leading to the widespread increase of MHC Class I and suggests that altered autophagy  
22 may play an important role in the pathogenesis of IBM.

23  
24  
25  
26  
27  
28  
29  
30  
31  
32  
33  
34  
35  
36  
37  
38  
39  
40  
41  
42  
43  
44  
45  
46 Almost all pathological features - protein aggregates, congophilic deposits and inflammation - were  
47 more abundant in IBM+RV than IBM-RV. Despite using slightly different inclusion criteria, similar  
48 differences have been reported between pathologically-typical and pathologically-atypical IBM.[21]  
49 However, we found no differences in the number of COX-/SDH+ fibres, the degree of MHC Class I  
50 upregulation, the morphology and distribution of p62 immunoreactive aggregates or the pattern of the  
51 inflammation between IBM+RV and IBM-RV, supporting our clinical observations that these are the  
52  
53  
54  
55  
56  
57  
58  
59  
60

1  
2  
3 same disease. We believe that the pathological differences between IBM+RV and IBM-RV are, in  
4 part, due to differences in disease duration. Two studies have shown that rimmed vacuoles are more  
5 common in patients who are older at the time of muscle biopsy,[24,11] suggesting that they are  
6 associated with chronologically more advanced disease. Therefore, the pathological findings which  
7 are more abundant in IBM+RV and thought to be typical of IBM may instead be indicative of  
8 chronologically more advanced disease explaining their limited sensitivity at disease presentation.  
9 However, possibly due to the number of cases analysed, we were unable to confirm a relationship  
10 between pathological features and clinical findings. It could be argued that biopsies from different  
11 muscles may have affected the pathological findings observed and differences between IBM groups.  
12 However, in a recent review of 59 muscle biopsies from IBM cases in our clinical archive with  
13 quadriceps (n=31) and deltoid (n=28) biopsies we found no significant difference in the frequency of  
14 pathological findings.  
15  
16  
17  
18  
19  
20  
21  
22  
23  
24  
25  
26  
27  
28

29 A robust clinicopathological definition of IBM is of paramount importance for diagnosis and for  
30 selection and entry of patients into clinical trials. We have shown that certain pathological findings  
31 are more abundant than those included in the current pathologically-focussed diagnostic criteria.  
32 Moreover, p62 immunoreactive deposits, increased MHC Class I expression, endomysial CD3+ T-  
33 cells and CD8+ T-cells and COX-/SDH+ fibres have sufficient sensitivity and specificity to aid in the  
34 histological differentiation of IBM from disease mimics, supporting their inclusion in future  
35 diagnostic criteria for IBM alongside clinical criteria. Both CD3+ T-cells and CD8+ T-cells are  
36 included in the diagnostic algorithm as there was little difference in their sensitivity and specificity for  
37 differentiating IBM+RV from PAM. However, IHC staining for CD3+ T-cells is likely to be more  
38 widely available and avoids the costs of extra staining to subtype the inflammatory infiltrate enabling  
39 diagnostic algorithm to be used by a greater number diagnostic laboratories. Using our diagnostic  
40 algorithm, we found there would be little additional diagnostic security in identifying partial invasion,  
41 performing EM or staining for amyloid deposits. Finally, mitochondrial changes and MHC Class I up-  
42 regulation were the most consistent findings in our IBM cases suggesting that they are central to the  
43  
44  
45  
46  
47  
48  
49  
50  
51  
52  
53  
54  
55  
56  
57  
58  
59  
60

1  
2  
3 pathogenesis and that further investigation and therapeutic intervention should be directed towards  
4  
5 these features.  
6  
7  
8  
9  
10  
11  
12  
13  
14  
15  
16  
17  
18  
19  
20  
21  
22  
23  
24  
25  
26  
27  
28  
29  
30  
31  
32  
33  
34  
35  
36  
37  
38  
39  
40  
41  
42  
43  
44  
45  
46  
47  
48  
49  
50  
51  
52  
53  
54  
55  
56  
57  
58  
59  
60

For peer review only



**ACKNOWLEDGEMENTS**

SB is funded by the Myositis Support Group. JLH is supported by the Reta Lila Weston Institute for Neurological Studies and the Myositis Support Group. This work was undertaken at UCLH/UCL who received a proportion of funding from the Department of Health's NIHR Biomedical Research Centres funding scheme.

**CONTRIBUTORSHIP STATEMENT**

Dr Stefen Brady - Acquisition of data, analysis and interpretation of data and drafting of manuscript.

Dr Waney Squier - Critical revision of manuscript for important intellectual content.

Prof. Caroline Sewry - Study concept and design and critical revision of manuscript for important intellectual content.

Prof. Mike Hanna - Critical revision of manuscript for important intellectual content.

Dr David Hilton-Jones - Critical revision of manuscript for important intellectual content.

Dr Janice Holton - Study concept and design, critical revision of manuscript for important intellectual content and study supervision.

**COMPETING INTERESTS**

None

**DATA SHARING**

All additional data can be found in supplementary tables and figures.

**REFERENCES**

1. Needham M, James I, Corbett A, Day T, Christiansen F, Phillips B, et al. Sporadic inclusion body myositis: phenotypic variability and influence of HLA-DR3 in a cohort of 57 Australian cases. *J Neurol Neurosurg Psychiatr*. 2008;79:1056–60.
2. Griggs RC, Askanas V, DiMauro S, Engel A, Karpata G, Mendell JR, et al. Inclusion body myositis and myopathies. *Ann Neurol*. 1995;38:705–13.
3. Arahata K, Engel AG. Monoclonal antibody analysis of mononuclear cells in myopathies. I: Quantitation of subsets according to diagnosis and sites of accumulation and demonstration and counts of muscle fibers invaded by T cells. *Ann Neurol*. 1984;16:193–208.
4. Mhiri C, Gherardi R. Inclusion body myositis in French patients. A clinicopathological evaluation. *Neuropathol Appl Neurobiol*. 1990;16:333–44.
5. Villanova M, Kawai M, Lübke U, Oh SJ, Perry G, Six J, et al. Rimmed vacuoles of inclusion body myositis and oculopharyngeal muscular dystrophy contain amyloid precursor protein and lysosomal markers. *Brain Res*. 1993;603:343–7.
6. Van der Meulen MF, Hoogendijk JE, Moons KG, Veldman H, Badrising UA, Wokke JH. Rimmed vacuoles and the added value of SMI-31 staining in diagnosing sporadic inclusion body myositis. *Neuromuscul Disord*. 2001;11:447–51.
7. Ferrer I, Olivé M. Molecular pathology of myofibrillar myopathies. *Expert Rev Mol Med*. 2008;10:e25.
8. Amato AA, Gronseth GS, Jackson CE, Wolfe GI, Katz JS, Bryan WW, et al. Inclusion body myositis: clinical and pathological boundaries. *Ann Neurol*. 1996;40:581–6.
9. Chahin N, Engel AG. Correlation of muscle biopsy, clinical course, and outcome in PM and sporadic IBM. *Neurology*. 2008;70:418–24.
10. Benveniste O, Guiguet M, Freebody J, Dubourg O, Squier W, Maisonobe T, et al. Long-term observational study of sporadic inclusion body myositis. *Brain*. 2011;134:3176–84.

- 1  
2  
3 11. Brady S, Squier W, Hilton-Jones D. Clinical assessment determines the diagnosis of inclusion  
4 body myositis independently of pathological features. *J Neurol Neurosurg Psychiatr.* 2013; 16.  
5  
6
- 7 12. Greenberg SA. Theories of the Pathogenesis of Inclusion Body Myositis. *Current*  
8  
9 *Rheumatology Reports.* 2010;12:221–8.  
10
- 11 13. Sherriff FE, Joachim CL, Squier MV, Esiri MM. Ubiquitinated inclusions in inclusion-body  
12 myositis patients are immunoreactive for cathepsin D but not  $\beta$ -amyloid. *Neuroscience Letters.*  
13 1995;194:37–40.  
14
- 15 14. Greenberg SA. How citation distortions create unfounded authority: analysis of a citation  
16 network. *BMJ.* 2009;339:b2680.  
17
- 18 15. Needham M, and Mastaglia FL. (2007). Inclusion body myositis: current pathogenetic concepts  
19 and diagnostic and therapeutic approaches. *Lancet Neurol.* 6, 620–631.  
20
- 21 16. Benveniste O, Hilton-Jones D. International Workshop on Inclusion Body Myositis held at the  
22 Institute of Myology, Paris, on 29 May 2009. *Neuromuscular Disorders.* 2010;20:414–21.  
23
- 24 17. Wedderburn LR, Varsani H, Li CKC, Newton KR, Amato AA, Banwell B, et al. International  
25 consensus on a proposed score system for muscle biopsy evaluation in patients with juvenile  
26 dermatomyositis: a tool for potential use in clinical trials. *Arthritis Rheum.* 2007;57:1192–201.  
27
- 28 18. Nogalska A, Terracciano C, D'Agostino C, King Engel W, Askanas V. p62/SQSTM1 is  
29 overexpressed and prominently accumulated in inclusions of sporadic inclusion-body myositis  
30 muscle fibers, and can help differentiating it from polymyositis and dermatomyositis. *Acta*  
31 *Neuropathol.* 2009;118:407–413.  
32
- 33 19. Wehl CC, Temiz P, Miller SE, Watts G, Smith C, Forman M, Hanson PI, Kimonis V, Pestronk  
34 A. TDP-43 accumulation in inclusion body myopathy muscle suggests a common pathogenic  
35 mechanism with frontotemporal dementia. *J. Neurol. Neurosurg. Psychiatr.* 2008;79:1186–  
36 1189.  
37
- 38 20. Banwell BL, Engel AG. Alpha B-crystallin immunolocalization yields new insights into  
39 inclusion body myositis. *Neurology.* 2000;54:1033–1041.  
40  
41  
42  
43  
44  
45  
46  
47  
48  
49  
50  
51  
52  
53  
54  
55  
56  
57  
58  
59  
60

- 1  
2  
3 21. Dubourg O, Wanschitz J, Maisonobe T, Béhin A, Allenbach Y, Herson S, and Benveniste O.  
4 Diagnostic value of markers of muscle degeneration in sporadic inclusion body myositis. *Acta*  
5 *Myol.* 2011. 30, 103–108.  
6  
7  
8  
9 22. Hiniker A, Daniels BH, Lee HS, Margeta M. Comparative utility of LC3, p62 and TDP-43  
10 immunohistochemistry in differentiation of inclusion body myositis from polymyositis and  
11 related inflammatory myopathies. *Acta Neuropathologica Communications.* 2013. 1:29.  
12  
13 23. D’Agostino C, Nogalska A, Engel WK, Askanas V. In sporadic inclusion-body myositis muscle  
14 fibres TDP-43-positive inclusions are less frequent and robust than p62-inclusions, and are not  
15 associated with paired helical filaments. *Neuropathol Appl Neurobiol.* 2010; Available from:  
16 <http://www.ncbi.nlm.nih.gov/pubmed/20626631>.  
17  
18  
19  
20  
21  
22  
23 24. Momma K, Noguchi S, Malicdan MCV, Hayashi YK, Minami N, Kamakura K, et al. Rimmed  
24 vacuoles in Becker muscular dystrophy have similar features with inclusion myopathies. *PLoS*  
25 *ONE.* 2012;7:e52002.  
26  
27  
28  
29  
30  
31  
32  
33  
34  
35  
36  
37  
38  
39  
40  
41  
42  
43  
44  
45  
46  
47  
48  
49  
50  
51  
52  
53  
54  
55  
56  
57  
58  
59  
60

### Supplementary Figure 1 Control staining in brain and muscle tissue

Positive and negative (no primary) brain control sections and normal muscle stained using immunohistochemistry for: p62 (A-C), TDP-43 (D-F),  $\alpha$  B-crystallin (G-I), ubiquitin (J-K) and myotilin (M,N) and alkalised congo red (O).

(A-C) Negative (A) and positive (B) control sections of AD brain and normal muscle (C) stained for p62. Positive control shows p62 positive neurofibrillary tangles and dystrophic neurites (B). No p62 immunoreactivity is observed in normal muscle (C).

(D-F) Negative (D) and positive (E) control sections of FTLN-TDP brain and normal muscle (F) stained for TDP-43. Positive control shows normal nuclear labelling and mislocalised neuronal cytoplasmic staining with neuropil threads (E). Insert shows a neuron with absent nuclear TDP-43 and a cytoplasmic TDP-43 inclusion (E, red arrow and x100 insert). Nuclear TDP-43 staining is observed in normal muscle.

(G-I) Negative (G) and positive (H) control sections of CBD brain and normal muscle (I) stained for  $\alpha$  B-crystallin. Positive control shows neuropil threads and a balloon cell neuron (H; red arrow and x100 insert). No  $\alpha$  B-crystallin immunoreactivity is observed in normal muscle (I).

(J-L) Negative (J) and positive (K) control AD brain and normal muscle (L) stained for ubiquitin. Positive control shows dystrophic neurites and neuropil threads (K). No ubiquitin immunoreactivity is observed in normal muscle (L).

(M,N) Negative (M) and positive (N) control muscle stained for myotilin. Mild sarcoplasmic staining is observed in normal muscle (N).

(O) Positive control section of AD brain showing an amyloid plaque (O).

Scale bar represents 100  $\mu$ m in A-D, F and H-M; and 50  $\mu$ m in E, N-O.

p62 = Sequestosome 1; AD = Alzheimer's disease; TDP-43 = Transactivation response DNA binding protein 43; FTLN-TDP = Frontotemporal lobar degeneration with TDP-43 positive inclusions; CBD = Corticobasal degeneration.

### Supplementary Figure 2 IBM inflammatory score-tool

Score tool modified from the published juvenile dermatomyositis inflammatory (JDM) score tool [17] to specifically assess the type, degree and distribution of inflammation in IBM. The inflammatory domain was augmented to include T-cells, T-cell subtypes, B-cells and macrophages. MHC Class I staining was expanded to include three patterns of labelling. The vascular, muscle fibre and connective tissue domains which are present in the JDM score tool were not included.

1  
2  
3 **Supplementary Figure 3 Sensitivity and specificity of rimmed vacuoles, protein aggregates and**  
4 **mitochondrial changes in IBM+RV compared to PAM**  
5

6  
7 Receiver operating characteristic curves for each test including the area under the curve and optimum  
8 cut-off with its associated sensitivity and specificity for rimmed vacuoles (A), myotilin (B), ubiquitin  
9 (C), TDP-43 (D), p62 (E) immunoreactive deposits, congophilic deposits (F) and COX-/SDH+ fibres  
10 (G). COX/SDH HC staining was the most discriminative test for differentiating IBM+RV and PAM  
11 (G). However, there was little difference between COX/SDH HC staining, TDP-43 and p62 IHC  
12 staining and none were sufficiently discriminative to be considered diagnostic. AUC = Area under the  
13 curve.  
14  
15  
16  
17  
18  
19  
20  
21

22  
23 **Supplementary Figure 4 Sensitivity and specificity of protein aggregates and mitochondrial**  
24 **changes in IBM-RV compared to PM&DM**  
25

26  
27 Receiver operating characteristic curves for each test showing the area under the curve and optimum  
28 cut-off with its sensitivity and specificity for myotilin (A), ubiquitin (B), TDP-43 (C), p62 (D)  
29 immunoreactive deposits, congophilic deposits (E) and COX-/SDH+ fibres (F). COX/SDH  
30 histochemical staining (F) and myotilin (G) IHC were the most discriminative tests for differentiating  
31 IBM-RV and PM&DM. AUC = Area under the curve.  
32  
33  
34  
35  
36  
37  
38  
39

40 **Figure 1 Protein aggregates and congophilic deposits in IBM**

41 Stained cryostat sections, showing fibres, often in clusters, containing protein aggregates stained for  
42 p62 (A), TDP-43 (B), ubiquitin (C),  $\alpha$ B-crystallin (D) and myotilin (E). Protein aggregates were  
43 present throughout fibres, and were observed in apparently normal fibres, vacuolated fibres and fibres  
44 surrounded by inflammatory infiltrates. In fibres containing TDP-43 aggregates, myonuclear TDP-43  
45 staining was frequently reduced (B). Congophilic deposits were observed in vacuolated fibres using  
46 epifluorescence (F). Tissue sections were examined using both the rhodamine red and fluorescein  
47 isothiocyanate filters to exclude areas of auto-fluorescence (arrow). Combined fluorescent image is  
48 shown. Four patterns of immunoreactivity were observed in IBM and disease controls stained for p62  
49  
50  
51  
52  
53  
54  
55  
56  
57  
58  
59  
60

1  
2  
3 using IHC (G)(H)(I)(J). Pattern I (G) - strongly stained, discreet and clearly delineated, round or  
4 angular aggregates, variable in number and size within a muscle fibre but rarely filling it and  
5 predominantly located subsarcolemmal, but also perinuclear and adjacent to vacuoles. Pattern II (H) -  
6 large aggregates of variable staining intensity. Pattern III (I) - fine granular aggregates dispersed  
7 throughout the fibre. Pattern IV (J) - fine granules and wisps of p62 immunoreactivity set within  
8 weakly basophilic inclusions.

9  
10  
11 Scale bar represents 50  $\mu\text{m}$  in A and D; 25  $\mu\text{m}$  in B, C and E-J.

12  
13  
14  
15  
16  
17  
18  
19  
20  
21  
22  
23 **Figure 2 Percentage of muscle fibres containing protein aggregates and Griggs' pathological**  
24 **features**

25  
26  
27 Box and whisker plot illustrating the percentage of muscle fibres containing pathological  
28 abnormalities contained in the Griggs criteria and protein aggregates in Griggs' pathologically-  
29 definite IBM. Fibres containing aggregates immunoreactive for p62 and  $\alpha\text{B}$ -crystallin were more  
30 frequent than those containing the current diagnostic pathological features (red bars) ( $p < 0.05$ ). Protein  
31 aggregates recognised by all antibodies were found in a significantly larger number of fibres than  
32 partial invasion ( $p < 0.02$ ).

33  
34  
35  
36  
37  
38  
39  
40  
41  
42 **Figure 3 Percentage of fibres containing protein aggregates and COX-/SDH+ fibres in each**  
43 **group**

44  
45  
46 Box and whisker plots illustrating the percentage of fibres in each diagnostic category containing p62  
47 (A), TDP-43 (B), myotilin (C) and ubiquitin (D) immunoreactive aggregates, congophilic deposits (E)  
48 and COX-/SDH+ fibres (F). All protein aggregates were present in a greater percentage of fibres in  
49 IBM+RV than in IBM-RV. There was no difference in the percentage of COX-/SDH+ muscle fibres  
50 between these groups. IBM+RV biopsies had a greater percentage of fibres containing p62 (A) and  
51 TDP-43 (B) immunoreactive aggregates and COX-/SDH+ fibres (F) than PAM. Pathological findings

1  
2  
3 were similar in IBM-RV and PM&DM, with no differences in the percentage of fibres containing p62  
4 (A), TDP-43 (B) and ubiquitin (D) immunoreactive aggregates or congophilic deposits (E). However,  
5  
6 there was a greater percentage of COX-/SDH+ fibres (F) in IBM-RV than PM&DM and a greater  
7  
8 percentage of fibres containing myotilin immunoreactive aggregates (C) in PM&DM than IBM-RV.  
9

10  
11 \*Statistically significant results.  
12  
13

#### 14 15 16 **Figure 4 Proposed diagnostic algorithm for IBM based on pathological findings**

17  
18 Flow diagram showing a proposed pathway for diagnosing IBM based on the pathological findings.  
19  
20 Increased MHC Class I staining was observed in all cases of IBM and pattern I p62 aggregates in all  
21 cases of IBM+RV making them good initial screening tests. Their absence rules-out a diagnosis of  
22 IBM and IBM+RV respectively. The presence of endomysial CD3+ T-cell score >1, endomysial  
23 CD8+ T-cell score >0 or strong MHC Class I staining in a biopsy with rimmed vacuoles and p62  
24 aggregates secures a diagnosis of IBM+RV. Differentiating IBM-RV and PM&DM pathologically is  
25 more challenging. The presence of COX-/SDH+ fibres is not specific to IBM-RV; although COX-  
26 /SDH+ fibres were not present in every case of IBM-RV their absence casts doubt on the diagnosis of  
27 IBM-RV. Pattern I p62 aggregates may enable IBM to be differentiated from PM when present.  
28 However, they may lack sensitivity for IBM-RV, therefore their absence does not rule out the  
29 diagnosis.  
30  
31  
32  
33  
34  
35  
36  
37  
38  
39  
40  
41  
42  
43  
44  
45  
46  
47  
48  
49  
50  
51  
52  
53  
54  
55  
56  
57  
58  
59  
60



1  
2  
3 **A retrospective cohort study identifying the principal pathological features useful in the**  
4 **diagnosis of inclusion body myositis**  
5  
6  
7  
8

9 Corresponding author:

10 Dr Janice L Holton

11 Department of Molecular Neuroscience, UCL Institute of Neurology, Queen Square, London, UK.

12 janice.holton@ucl.ac.uk; tel: 00 44 (0)20 3448 4239; fax: 00 44 (0)20 3448 4486.  
13  
14  
15  
16  
17

18  
19 Authors:

20 Stefen Brady<sup>1</sup>, Waney Squier<sup>2</sup>, Caroline Sewry<sup>3,4</sup>, Michael Hanna<sup>1</sup>, David Hilton-Jones<sup>5</sup>, Janice L  
21  
22 Holton<sup>6</sup>  
23  
24  
25  
26

27 <sup>1</sup>MRC Centre for Neuromuscular Diseases, UCL Institute of Neurology and National Hospital for  
28 Neurology, Neurosurgery, Queen Square, London, UK.

29 <sup>2</sup>Department of Neuropathology, University of Oxford, John Radcliffe Hospital, Oxford, UK.

30 <sup>3</sup>Dubowitz Neuromuscular Centre, Institute of Child Health and Great Ormond Street Hospital for  
31 Children, London, UK.  
32

33 <sup>4</sup>Wolfson Centre of Inherited Neuromuscular Diseases, RJA Orthopaedic Hospital, Oswestry, UK.

34 <sup>5</sup>Nuffield Department of Clinical Neurosciences (Clinical Neurology), University of Oxford, John  
35 Radcliffe Hospital, Oxford, UK.  
36

37 <sup>6</sup>Department of Molecular Neuroscience, UCL Institute of Neurology, Queen Square, London, UK.  
38  
39  
40  
41  
42  
43  
44  
45  
46  
47  
48

49 Keywords: Neurology, adult neurology, neuromuscular disease, neuropathology

50 Running title: Pathological criteria for inclusion body myositis

51  
52 Word count: 2990  
53  
54  
55  
56  
57  
58  
59  
60

## ABSTRACT

### Objectives

The current pathological diagnostic criteria for sporadic inclusion body myositis (IBM) lack sensitivity. Using immunohistochemical techniques abnormal protein aggregates have been identified in IBM, including some associated with neurodegenerative disorders. Our objective was to investigate the diagnostic utility of a number of markers of protein aggregates together with mitochondrial and inflammatory changes in IBM.

### Design

Retrospective cohort study. The sensitivity of pathological features was evaluated in cases of Griggs' definite IBM. The diagnostic potential of the most reliable features was then assessed in clinically-typical IBM with rimmed vacuoles ( $n=15$ ) and clinically-typical IBM without rimmed vacuoles ( $n=9$ ) and IBM mimics - vacuolar myopathies ( $n=7$ ) and steroid-responsive inflammatory myopathies ( $n=11$ ).

### Setting

Specialist muscle services at the John Radcliffe Hospital, Oxford and the National Hospital for Neurology and Neurosurgery, London.

### Results

Individual pathological features, in isolation, lacked sensitivity and specificity. However, the morphology and distribution of p62 aggregates in IBM were characteristic and in a myopathy with rimmed vacuoles, the combination of characteristic p62 aggregates and increased sarcolemmal and internal MHC Class I expression or endomysial T-cells were diagnostic for IBM with a sensitivity of 93% and specificity of 100%. In an inflammatory myopathy lacking rimmed vacuoles, the presence of mitochondrial changes was 100% sensitive and 73% specific for IBM; characteristic p62 aggregates were specific (91%), but lacked sensitivity (44%).

### Conclusions

We propose an easily applied diagnostic algorithm for the pathological diagnosis of IBM. Additionally our findings support the hypothesis that many of the pathological features considered

1  
2  
3 typical of IBM develop later in the disease, explaining their poor sensitivity at disease presentation  
4  
5 and emphasising the need for revised pathological criteria to supplement the clinical criteria in the  
6  
7 diagnosis of IBM.  
8  
9

## 10 11 **STRENGTHS AND LIMITATIONS**

12  
13 The present study is a multicentre retrospective evaluation of the diagnostic utility of pathological  
14  
15 findings for differentiating IBM from myopathies important in the differential diagnosis – myopathies  
16  
17 containing rimmed vacuoles and steroid-responsive inflammatory myopathies.  
18  
19

20  
21 The main strength of our study was the systematic detailed analysis of well-defined cases. This  
22  
23 enabled us to determine the sensitivity and specificity of individual pathological features and produce  
24  
25 an easily applied pathological diagnostic algorithm for IBM for use in clinical practice.  
26  
27

28  
29 Study limitations include the small number of cases and the retrospective design. Further prospective  
30  
31 studies are now required in larger cohorts of patients.  
32  
33

## 34 35 **INTRODUCTION**

36  
37 Sporadic inclusion body myositis (IBM) is the commonest acquired myopathy in those aged over 50  
38  
39 years.[1] Although classified as an idiopathic inflammatory myopathy, muscle biopsy reveals both  
40  
41 degenerative and inflammatory features. The widely used Griggs diagnostic criteria require the  
42  
43 presence of several pathological findings,[2] namely rimmed vacuoles, an inflammatory infiltrate with  
44  
45 invasion of non-necrotic fibres by mononuclear inflammatory cells (partial invasion), and either  
46  
47 amyloid deposits or 15-18 nm tubulofilaments identified by electron microscopy (EM). Although  
48  
49 these features in combination are highly specific for IBM, individually they occur in other  
50  
51 myopathies, including some important in the differential diagnosis for IBM.[3-7] Moreover, cases of  
52  
53 clinically-typical IBM have been reported where the combination of these pathological features is  
54  
55 absent causing diagnostic difficulty.[8-11]  
56  
57

1  
2  
3  
4  
5 Over the last two decades, pathological accumulation of many different proteins has been reported in  
6  
7 muscle fibres in IBM.[12] Proteins typically associated with neurodegenerative diseases such as  $\beta$ -  
8  
9 amyloid ( $A\beta$ ), hyperphosphorylated tau and ubiquitin and newer neurodegenerative markers such as  
10  
11 p62 and transactivation response DNA binding protein-43 (TDP-43) have been identified, as well as  
12  
13 proteins associated with myofibrillar myopathies (MFM), including desmin and  $\alpha$ B-crystallin.  
14  
15 However, not all observations have been consistently reproduced.[13,14] Mitochondrial changes have  
16  
17 also been proposed for inclusion in IBM diagnostic criteria,[15]. Clear guidelines for the  
18  
19 incorporation of immunohistochemical findings and mitochondrial changes into diagnostic criteria for  
20  
21 IBM have not been established.[16]  
22  
23  
24

25 Previously, we have shown that the characteristic pattern of weakness associated with IBM is  
26  
27 indicative of the diagnosis, even if Griggs pathological features are absent.[11] However, it is not  
28  
29 invariably found at presentation. Here we sought to identify which pathological features, other than  
30  
31 the Griggs pathological criteria, add further support to the diagnosis of IBM. We systematically  
32  
33 investigated which pathological features are present in Griggs pathologically-definite IBM and then  
34  
35 established the diagnostic utility of these features in cases of IBM lacking the Griggs criteria, using  
36  
37 myopathies considered in the differential diagnosis of IBM as controls.  
38  
39  
40

## 41 **MATERIALS AND METHODS**

42  
43 The study received ethical approval from the Departments of Research and Development at Oxford  
44  
45 University Hospitals NHS Trust, Oxford and University College London Hospitals NHS Foundation  
46  
47 Trust, London.  
48  
49  
50  
51  
52  
53  
54  
55  
56  
57  
58  
59  
60

## Cases

All patients were followed by specialist muscle services at the John Radcliffe Hospital, Oxford and the National Hospital for Neurology and Neurosurgery, London. Biopsies were taken for diagnostic purposes from the deltoid or quadriceps muscles and prior to any treatment.

Methods for demonstrating pathological features in IBM, additional to those defined by the Griggs criteria, were determined in six Griggs pathologically-definite cases of IBM. Cases with no clinical or pathological evidence of neuromuscular disease were used as controls. The diagnostic utility of the pathological features identified was assessed in two groups of clinically-typical IBM; one with rimmed vacuoles on muscle biopsy (IBM+RV;  $n=15$ ), the other without rimmed vacuoles on muscle biopsy (IBM-RV;  $n=9$ ). Disease controls were cases of steroid-responsive inflammatory myopathies [polymyositis and dermatomyositis; (PM&DM);  $n=11$ ] and protein accumulation myopathies with rimmed vacuoles (PAM;  $n=7$ ). Clinical characteristics and inclusion criteria are summarised in Supplementary tables 1 and 2. Tissue from brains donated to the Queen Square Brain Bank for Neurological Disorders was used as positive controls for protein aggregate staining.

## Muscle biopsies

Muscles biopsies were snap frozen at the time of surgery in isopentane cooled liquid nitrogen. Until sectioning all samples were stored at  $-80^{\circ}\text{C}$ . Serial tissue sections were cut to a thickness of  $8\ \mu\text{m}$ , allowed to air dry and stored at  $-80^{\circ}\text{C}$  until staining. Prior to staining, tissue sections were allowed to dry at room temperature. Tissue sections were stained with haematoxylin and eosin (H&E), combined cytochrome oxidase (COX) succinate dehydrogenase (SDH) histochemistry and for amyloid using alkalised Congo red, crystal violet and thioflavin S. Tissue sections for immunohistochemical staining were fixed for 10 minutes, if required, washed for five minutes in running water and incubated in 0.5% hydrogen peroxide to block endogenous peroxidase for 20 minutes. After further washing, tissue sections were incubated in 5% normal goat serum (Vector Laboratories, Burlingame, California) for 30 minutes and then systematically stained for: 1) proteins classically associated with

1  
2  
3 neurodegenerative disease: tau and hyperphosphorylated tau, ubiquitin, A $\beta$  and  $\alpha$ -synuclein; 2)  
4  
5 proteins more recently reported in neurodegenerative disease: p62, TDP-43, fused in sarcoma protein  
6  
7 (FUS) and valosin containing protein (VCP); 3) nuclear membrane proteins: lamin A/C and emerin;  
8  
9 4) proteins associated with MFM: desmin, myotilin and  $\alpha$ B-crystallin; and 5) inflammatory cells and  
10  
11 major histocompatibility complex class I (MHC Class I): CD3+ T-cells, CD4+ T-cells, CD8+ T-cells,  
12  
13 B-cells and macrophages. Primary antibody binding was visualised using Dako REAL™ EnVision™  
14  
15 Detection System which contains horse-radish peroxidase (HRP) labelled goat anti-rabbit/mouse  
16  
17 secondary and 3,3'-diaminobenzidine (DAB); following incubation with the relevant primary  
18  
19 antibody, tissue sections were washed in phosphate buffered saline (PBS), incubated with HRP  
20  
21 labelled goat anti-rabbit/mouse secondary for 30 minutes, washed in PBS and incubated in a 1:50  
22  
23 solution of DAB for three to five minutes. Details of commercial antibodies and conditions used are  
24  
25 provided in Supplementary Table 3. IHC for each antibody was performed on all cases simultaneously  
26  
27 and including positive and negative controls (Supplementary Figure 1).

### 31 Definitions and quantification

32  
33 The total number of fibres and the number undergoing partial invasion, containing rimmed vacuoles,  
34  
35 protein aggregates and COX-negative SDH-positive (COX-/SDH+) fibres were quantified using  
36  
37 ImagePro version 6.2 (Media Cybernetics), to ensure that the whole biopsy was systematically  
38  
39 analysed. Only transversely-orientated fibres not undergoing necrosis or regeneration were quantified.  
40  
41 Tissue sections stained with Congo red were visualised under fluorescent and polarised light. Areas of  
42  
43 fluorescence were examined using both rhodamine red (excitation 512-546 nm and emission 600-640  
44  
45 nm) and fluorescein isothiocyanate (excitation 440-480 nm and emission 527-530 nm) filters to  
46  
47 exclude auto-fluorescence. Supplementary Table 4 provides definitions of the pathological features  
48  
49 assessed. The inflammatory infiltrate and MHC Class I staining were analysed using a modified  
50  
51 version of the semi-quantitative juvenile dermatomyositis score-tool (Supplementary Figure 2).[17]  
52  
53 Assessments were performed blind to clinical details and diagnosis by a single individual (SB). Ten  
54  
55  
56  
57  
58  
59  
60

1  
2  
3 per cent of slides were re-counted to assess intra-observer reliability and 336 slides were assessed  
4  
5 independently by two observers (SB and JLH) to determine inter-observer reliability.  
6  
7

### 8 9 **Statistical analysis**

10  
11 Statistical analyses were performed using GraphPad PRISM version 5. Continuous and categorical  
12  
13 variables were compared using Mann Whitney *U*-test and chi-squared or Fisher's exact test  
14  
15 respectively. Spearman's rank order correlation was used to determine the strength and direction of  
16  
17 associations between pathological findings. Linear regression was used to determine relationships  
18  
19 between clinical features and pathological findings. Test characteristics were calculated using receiver  
20  
21 operating characteristic (ROC) curves and 2x2 contingency tables. A test was considered diagnostic  
22  
23 when sensitivity >75% and specificity >95% or sensitivity >95% and specificity >75%. Intra-observer  
24  
25 and inter-observer agreement was calculated using Bland-Altman plots and Cohen's kappa statistic  
26  
27 ( $\kappa$ ). Repeat counts were within 95% confidence intervals using Bland-Altman plots and  $\kappa$  was  $\geq 0.7$   
28  
29 indicating good intra-observer and good or excellent inter-observer reliability. Statistical significance  
30  
31 was set at  $p < 0.05$ .  
32  
33

## 34 35 **RESULTS**

### 36 37 **Pathological findings in Griggs' pathologically-definite IBM**

38  
39 p62, TDP-43, ubiquitin, myotilin and  $\alpha$ B-crystallin immunoreactive aggregates were present in all six  
40  
41 IBM cases but not in normal controls (Figures 1A-E). p62 and  $\alpha$ B-crystallin immunoreactive  
42  
43 aggregates were present in a greater percentage of fibres than the pathological features required in the  
44  
45 Griggs criteria ( $p < 0.05$ ) (Figure 2). Despite their abundance,  $\alpha$ B-crystallin immunoreactive aggregates  
46  
47 were difficult to quantify due to a significant variability in their morphology. No immunoreactive  
48  
49 deposits were observed in IBM cases or normal controls with antibodies to tau and phosphorylated  
50  
51 tau, A $\beta$ ,  $\alpha$ -synuclein, desmin, emerin, lamin A/C, FUS or VCP. Alkalinised Congo red staining was  
52  
53 more sensitive than crystal violet and thioflavin S staining for observing amyloid aggregates (Figure  
54  
55 1F). Tissue sections containing congophilic deposits identified under fluorescence light showed no  
56  
57

1  
2  
3 apple-green birefringence under polarised light. Mitochondrial changes and increased sarcolemmal  
4 and sarcoplasmic MHC Class I staining were observed in all six IBM cases, but not in normal  
5 controls. The inflammatory infiltrate was predominantly composed of endomysial CD8+ T-cells and  
6 macrophages, with relatively few B-cells.  
7  
8  
9

### 10 11 12 13 **Quantitative analysis of pathological features in IBM and disease controls**

14  
15 Having shown that p62, TDP-43, ubiquitin and myotilin aggregates, congophilic deposits, MHC Class  
16 I and inflammatory cells were prevalent in Griggs' pathologically-definite IBM, the presence of these  
17 abnormalities, together with mitochondrial changes were assessed in IBM+RV, IBM-RV and disease  
18 controls.  
19  
20  
21  
22

23  
24  
25 The percentage of fibres containing p62, TDP-43, myotilin and ubiquitin aggregates and congophilic  
26 deposits were greater in IBM+RV than in IBM-RV; there was no difference in the number of COX-  
27 /SDH+ fibres (Figure 3A-F). Protein aggregates were observed in morphologically-normal fibres and  
28 in fibres exhibiting Griggs' pathological features. p62 and TDP-43 positive aggregates were present in  
29 a greater percentage of fibres in IBM+RV compared to PAM; however, there were no differences in  
30 the percentage of fibres containing myotilin and ubiquitin aggregates or congophilic deposits. The  
31 percentage of fibres containing p62, TDP-43 and ubiquitin aggregates or congophilic deposits were  
32 similar in IBM-RV and PM&DM; however, myotilin aggregates were present in a greater percentage  
33 of fibres in PM&DM and COX-/SDH+ fibres were more abundant in IBM-RV. Analysis of the total  
34 inflammatory infiltrate (the sum of the semi-quantitative scores for T-cells, B-cells and macrophages)  
35 in the endomysium, perimysium and perivascular areas revealed that there were greater numbers of  
36 inflammatory cells in the endomysium and perimysium in IBM+RV than in PAM ( $p<0.03$ ). The same  
37 analysis comparing the sum of the inflammatory cells in IBM-RV and PM&DM revealed that the  
38 distribution and intensity of the inflammatory infiltrate was similar.  
39  
40  
41  
42  
43  
44  
45  
46  
47  
48  
49  
50  
51  
52  
53  
54  
55  
56  
57  
58  
59  
60



### Diagnostic utility of pathological features in IBM and disease controls

To mimic the diagnostic difficulty encountered in clinical practice, the ability of each test to differentiate between myopathies containing rimmed vacuoles (IBM+RV and PAM) and between inflammatory myopathies (IBM–RV and PM&DM) was assessed.

#### *Diagnostic utility determined using receiver-operating characteristic curves*

Individually, the presence of p62 immunoreactive inclusions and COX-/SDH+ fibres had the highest sensitivity and specificity for differentiating IBM+RV from PAM, (Supplementary Figure 3) (Table 1). Differentiating between IBM–RV and PM&DM, myotilin positive inclusions or COX-/SDH+ fibres had the highest sensitivity and specificity for IBM-RV (Supplementary Figure 4) (Table 1). Only the presence of myotilin positive inclusions satisfied criteria to be considered suitable as a diagnostic test (<0.01% of fibres containing myotilin aggregates had a sensitivity of 100% and specificity of 82% for IBM-RV).

**Table 1 Test characteristics**

| Test feature         | IBM+RV v. PAM |                                   |             |             | IBM-RV v. PM&DM |                                   |             |             |
|----------------------|---------------|-----------------------------------|-------------|-------------|-----------------|-----------------------------------|-------------|-------------|
|                      | AUC           | Cut-off<br>(% of affected fibres) | Sensitivity | Specificity | AUC             | Cut-off<br>(% of affected fibres) | Sensitivity | Specificity |
| Rimmed vacuoles      | 0.60          | >0.28                             | 0.53        | 0.71        | -               | -                                 | -           | -           |
| p62 aggregates       | 0.87          | >0.48                             | 0.87        | 0.86        | 0.60            | >0.21                             | 0.22        | 0.91        |
| TDP-43 aggregates    | 0.80          | >0.34                             | 0.80        | 0.86        | 0.53            | <0.01                             | 0.89        | 0.18        |
| Ubiquitin aggregates | 0.68          | >0.18                             | 0.53        | 0.85        | 0.64            | <0.01                             | 1.00        | 0.27        |
| Myotilin aggregates  | 0.55          | <0.25                             | 1.00        | 0.29        | 0.91            | <0.01                             | 1.00        | 0.82        |
| Congophilic deposits | 0.56          | >0.24                             | 0.73        | 0.71        | 0.56            | <0.03                             | 0.11        | 0.82        |
| COX-/SDH+ fibres     | 0.87          | >0.04                             | 0.86        | 0.86        | 0.93            | >0.1                              | 0.78        | 0.91        |

Table shows the area under the curve and optimum cut-off for each test with the accompanying sensitivity and specificity. AUC = Area under the curve.

1  
2  
3 ***Diagnostic utility determined by comparing proportion of affected cases in each diagnostic group***  
4

5 In the aforementioned experiments, the number of fibres within each muscle biopsy was quantified.  
6  
7 However, this is impractical for routine clinical use. Thus, the proportions of affected cases in each  
8  
9 group were compared (Table 2). This revealed that neither staining for protein aggregates nor  
10  
11 congophilic deposits could differentiate between IBM+RV and PAM. The pathological findings in  
12  
13 IBM-RV and PM&DM were also similar, except that the absence of myotilin immunoreactive  
14  
15 aggregates was sensitive and specific for IBM-RV. COX-/SDH+ fibres were also suggestive of IBM-  
16  
17 RV; one or more COX-/SDH+ fibres had a sensitivity of 100% and specificity 73% for IBM-RV.  
18  
19

20  
21 Increased MHC Class I expression lacked specificity. However, strong (diffuse sarcolemmal and  
22  
23 sarcoplasmic) MHC Class I up-regulation was diagnostic for IBM+RV, differentiating it from PAM,  
24  
25 as were the presence of either endomysial CD3+ T-cell or CD4+ T-cell scores >1 or an endomysial  
26  
27 CD8+ T-cell score >0. Partial invasion was specific for IBM+RV, but lacked sensitivity. **Although the**  
28  
29 **sum of the inflammatory infiltrate was similar in IBM-RV and PM&DM, analysis of the**  
30  
31 **inflammatory cell sub-types revealed** greater numbers of perimysial CD3+ T-cells, CD8+ T-cells and  
32  
33 endomysial B-cells [were observed] in PM&DM than in IBM-RV ( $p \leq 0.02$ ), however, this was not  
34  
35 diagnostically useful. There was no difference in the proportion of cases with fibres undergoing  
36  
37 partial invasion between IBM-RV and PM&DM.  
38  
39  
40  
41  
42  
43  
44  
45  
46  
47  
48  
49  
50  
51  
52  
53  
54  
55  
56  
57  
58  
59  
60

**Table 2 Comparison of the proportion of positive cases in each group**

| Pathological features                | IBM+RV   | PAM     | IBM+RV v. PAM |             | IBM-RV  | PM&DM    | IBM-RV v. PM&DM |             | IBM+RV v. IBM-RV |
|--------------------------------------|----------|---------|---------------|-------------|---------|----------|-----------------|-------------|------------------|
|                                      | n (%)    | n (%)   | Sensitivity   | Specificity | n (%)   | n (%)    | Sensitivity     | Specificity | p value          |
| Number of cases                      | 15 (100) | 7 (100) |               |             | 9 (100) | 11 (100) |                 |             |                  |
| Aggregated proteins, n (%)           |          |         |               |             |         |          |                 |             |                  |
| p62                                  | 15 (100) | 6 (86)  | 1.00          | 0.14        | 4 (44)  | 3 (27)‡  | 0.40            | 0.72        | 0.003*           |
| TDP-43                               | 13 (87)  | 5 (71)  | 0.87          | 0.29        | 1 (11)  | 2 (18)‡  | 0.11            | 0.82        | 0.001*           |
| Ubiquitin                            | 11 (73)  | 4 (57)  | 0.73          | 0.43        | 0 (0)   | 3 (27)‡  | 0.00            | 0.73        | 0.001*           |
| Myotilin                             | 10 (67)  | 5 (71)  | 0.67          | 0.29        | 0 (0)   | 9 (82)   | 0.00            | 0.18        | 0.002*           |
| Congophilic deposits                 | 13 (87)  | 7 (100) | 0.87          | 0.00        | 1 (11)  | 0 (0)    | 0.11            | 1.00        | 0.001*           |
| COX-/SDH+ fibres†, n (%)             |          |         |               |             |         |          |                 |             |                  |
| Any                                  | 12 (86)  | 2 (29)  | 0.80          | 0.71        | 9 (100) | 3 (27)   | 1.00            | 0.73        | 0.5              |
| Inflammatory features, n (%)         |          |         |               |             |         |          |                 |             |                  |
| MHC Class I up-regulation            | 15 (100) | 3 (43)  | 1.00          | 0.57        | 9 (100) | 11 (100) | 1.00            | 0.00        | 1.00             |
| Strong MHC Class I up-regulation     | 14 (93)  | 0 (0)   | 0.93          | 1.00        | 9 (100) | 10 (91)  | 1.00            | 0.09        | 0.53             |
| Partial invasion                     | 10 (67)  | 0 (0)   | 0.67          | 1.00        | 3 (33)  | 2 (18)   | 0.33            | 0.82        | 0.11             |
| Endomysial CD3+ T-cell score >1      | 13 (87)  | 0 (0)   | 0.87          | 1.00        | 4 (44)  | 7 (64)   | 0.44            | 0.36        | 0.02*            |
| Endomysial CD4+ T-cell score >1      | 12 (80)  | 0 (0)   | 0.80          | 1.00        | 2 (22)  | 5 (45)   | 0.22            | 0.46        | 0.01*            |
| Endomysial CD8+ T-cell score >0      | 14 (93)  | 0 (0)   | 0.93          | 1.00        | 4 (44)  | 5 (45)   | 0.44            | 0.54        | 0.02*            |
| Endomysial CD68+ macrophage score >1 | 12 (80)  | 0 (0)   | 0.80          | 1.00        | 4 (44)  | 8 (73)   | 0.44            | 0.17        | 0.07             |

†In IBM with rimmed vacuoles n=14. ‡Pathological features present in DM, but not PM cases. \*Statistically significant results.

1  
2  
3 Because IBM-RV is more pathologically akin to PM than DM, analyses were repeated comparing  
4 IBM-RV and PM cases ( $n=6$ ). No p62, TDP-43 or ubiquitin immunoreactive aggregates were  
5  
6 observed in PM cases and the diagnostic utility of tests for differentiating between IBM-RV and PM  
7  
8 yielded similar results to prior analyses between IBM-RV and PM&DM.  
9  
10

### 11 12 13 ***Diagnostic utility of categorising the pattern of p62 staining***

14  
15 The pattern of p62 staining could be categorised into four distinct groups (Figure 1G-J). Aggregates  
16  
17 observed in IBM were present in vacuolated and non-vacuolated fibres and were strongly stained,  
18  
19 discreet and clearly delineated, round or angular and typically located subsarcolemmal, perinuclear  
20  
21 and peri-vacuolar (pattern I). This pattern was observed in every IBM case with p62 aggregates, one  
22  
23 (9%) case of DM and three (43%) cases of PAM (hereditary IBM, dystrophinopathy and genetically  
24  
25 undefined MFM). **Defining the pattern of immunoreactivity increased the discriminative value of p62**  
26  
27 **IHC for differentiating IBM+RV from PAM; pattern I p62 aggregates compared to any p62**  
28  
29 **aggregates increased the specificity from 14% to 57%, with no loss of sensitivity. Differentiating**  
30  
31 **IBM-RV and PM&DM, pattern I p62 aggregates were highly specific (91%), but lacked sensitivity**  
32  
33 **(44%). Patterns II, III and IV were not observed in any IBM cases.** Patterns II and III appeared to be  
34  
35 specific for PAM ( $n=2$ ; 26%), both were cases of myotilinopathy ( $n=2$ ; 67%), and DM ( $n=2$ ; 40%)  
36  
37 respectively. Pattern IV occurred in a genetically undefined case of MFM. No differences were  
38  
39 observed in the morphology of TDP-43, myotilin or ubiquitin aggregates between biopsies.  
40  
41  
42  
43

### 44 **Clinicopathological correlation**

45  
46 In IBM+RV, IBM-RV and pathologically-definite IBM, there were no correlations in individual  
47  
48 biopsies between pathological features. No relationships were identified between the pathological  
49  
50 findings and age at symptom onset, age at biopsy, disease duration or serum creatine kinase. The same  
51  
52 results were obtained when the IBM groups were analysed separately and as one.  
53  
54  
55  
56  
57  
58  
59  
60

### Proposed diagnostic algorithm

Based on our pathological findings, we propose a diagnostic algorithm for differentiating IBM from its disease mimics (Figure 4).

The algorithm was tested in a further 23 cases that fulfilled the criteria for IBM+RV ( $n=12$ ) and IBM-RV ( $n=11$ ). The algorithm correctly diagnosed 20 (87%) cases: 12 (100%) cases of IBM+RV and eight (73%) cases of IBM-RV. In IBM-RV, COX-/SDH+ fibres were present in 8 (73%) cases, pattern I p62 aggregates in 8 (73%) cases and both in 6 (55%) cases.

### DISCUSSION

While Griggs' pathological criteria have been accepted as diagnostic of IBM, many patients who, observed over time undoubtedly have IBM, lack one or more of the Griggs pathological features at presentation, even on repeat biopsy.[8,11] Despite IBM being associated with a characteristic pattern of finger flexor and knee extensor weakness, not all patients have this pattern at disease onset, and muscle biopsy remains an important tool in differentiating IBM from its mimics. We sought to determine which additional pathological features support a diagnosis of IBM, demonstrating that characteristic p62 immunoreactive aggregates, strong MHC Class I upregulation, endomysial CD3+ T-cell score >1, CD8+ T-cell score >0 and COX-/SDH+ fibres are features with sufficient sensitivity and specificity to differentiate IBM from pathologically similar myopathies and we propose an easily applied pathological algorithm for the diagnosis of IBM (Figure 4).

In agreement with previous studies, we observed p62,[18] TDP-43,[19] ubiquitin [13] and  $\alpha$ B-crystallin [20] immunoreactive aggregates and a predominantly endomysial inflammatory infiltrate [3] in Griggs pathologically-definite IBM. Diagnostic pathological studies of IBM have concentrated on differentiating IBM from other inflammatory myopathies and two recent quantitative studies have found that TDP-43 and markers of autophagy such as p62 and LC3 may be of diagnostic use.[21,22] However, in these studies only a fraction of each biopsy was analysed i.e. 200 fibres. We have found

1  
2  
3 this limited quantification does not correlate with the percentage of affected fibres in a biopsy nor  
4  
5 does it reflect the way in which a muscle biopsy is assessed. Additionally, studies have lacked  
6  
7 vacuolar myopathy control cases as it is believed that the inflammatory changes present in IBM  
8  
9 enable it to be easily differentiated from other vacuolar myopathies.[22] However, inflammatory  
10  
11 changes are frequently observed in muscular dystrophies and the degree of inflammatory change  
12  
13 necessary to confidently diagnose IBM is currently unknown.

14  
15  
16  
17 To mimic the typical diagnostic conundrums encountered in clinical practice, we evaluated the ability  
18  
19 of the pathological findings to differentiate IBM+RV from other vacuolar myopathies and IBM-RV  
20  
21 from steroid-responsive inflammatory myopathies. We found that quantitative analysis of protein  
22  
23 aggregates, congophilic deposits and COX-/SDH+ fibres was of limited diagnostic use. Analysing the  
24  
25 biopsies dichotomously and using a semi-quantitative score-tool revealed that increased MHC Class I  
26  
27 labelling was sensitive for IBM making it a good initial screening test, its absence excluding the  
28  
29 diagnosis. In agreement with an earlier study, we found p62 aggregates identified the largest number  
30  
31 of affected fibres in IBM.[23] Additionally, as a novel finding, the morphology and distribution of  
32  
33 p62 aggregates was characteristic in IBM. This characteristic pattern of p62 immunoreactive  
34  
35 aggregates was **highly sensitive** for IBM+RV (100%); their absence from a biopsy containing rimmed  
36  
37 vacuoles effectively ruling-out a diagnosis of IBM. We confirmed that the most diagnostically useful  
38  
39 pathological findings in IBM+RV were evidence of an immune mediated process; strong MHC Class  
40  
41 I staining, **endomysial CD3+ T-cell score >1** or an endomysial **CD8+ T-cell score >0** were diagnostic.  
42  
43 Having identified either of these features in a biopsy containing rimmed vacuoles no extra diagnostic  
44  
45 certainty was gained from observing partial invasion, COX-/SDH+ fibres or congophilic deposits.

46  
47  
48  
49 The most discriminative pathological tests for differentiating between IBM-RV and PM&DM were  
50  
51 COX/SDH staining and myotilin IHC. Consistent with a recent study,[9] we found the absence of  
52  
53 mitochondrial changes **casts doubt on a** diagnosis of IBM. There was no difference in the median age  
54  
55 between IBM-RV and PM&DM cases to account for the difference observed in COX-/SDH+ fibres.

1  
2  
3 The presence of myotilin and ubiquitin immunoreactive aggregates appeared to rule out a diagnosis of  
4 IBM-RV. However, we believe the presence of these features in IBM+RV indicates that they are  
5 unlikely to be diagnostically reliable features for differentiating between IBM-RV and steroid-  
6 responsive inflammatory myopathies. Although no pathological feature was able to differentiate IBM-  
7 RV from steroid responsive inflammatory myopathies with certainty the presence of characteristic  
8 p62 aggregates and the absence of COX-/SDH+ fibres may help in supporting and opposing a  
9 diagnosis of IBM-RV respectively. Pattern I p62 immunoreactive aggregates were only present in  
10 44% of the initial IBM-RV cases tested, but they were not observed in PM cases and were very rare in  
11 DM. Although pattern I p62 aggregates appear to lack sensitivity their specificity was 91% making  
12 their presence highly suggestive of a diagnosis of IBM-RV. However, we identified pattern I p62 in  
13 eight out of 11 (73%) further cases of IBM-RV that were assessed indicating a greater sensitivity and  
14 that p62 IHC warrants further investigation and validation in a larger, independent series. The  
15 diagnostic utility of the other patterns of p62 staining is uncertain. Although pattern II appeared to  
16 have some specificity for myotilinopathy the small number of cases makes it drawing any conclusion  
17 problematic. In addition to p62 other autophagic proteins have been found in IBM and suggested as  
18 diagnostic markers. [22] Autophagy is a cellular mechanism for degrading and recycling cellular  
19 proteins and organelles and therefore, altered autophagy could lead to the accumulation of abnormal  
20 mitochondria and misfolded aggregation-prone proteins and may also result in altered antigen  
21 presentation leading to the widespread increase of MHC Class I and suggests that altered autophagy  
22 may play an important role in the pathogenesis of IBM.

23  
24  
25  
26  
27  
28  
29  
30  
31  
32  
33  
34  
35  
36  
37  
38  
39  
40  
41  
42  
43  
44  
45  
46 Almost all pathological features - protein aggregates, congophilic deposits and inflammation - were  
47 more abundant in IBM+RV than IBM-RV. Despite using slightly different inclusion criteria, similar  
48 differences have been reported between pathologically-typical and pathologically-atypical IBM.[21]  
49 However, we found no differences in the number of COX-/SDH+ fibres, the degree of MHC Class I  
50 upregulation, the morphology and distribution of p62 immunoreactive aggregates or the pattern of the  
51 inflammation between IBM+RV and IBM-RV, supporting our clinical observations that these are the  
52  
53  
54  
55  
56  
57  
58  
59  
60

1  
2  
3 same disease. We believe that the pathological differences between IBM+RV and IBM-RV are, in  
4  
5 part, due to differences in disease duration. Two studies have shown that rimmed vacuoles are more  
6  
7 common in patients who are older at the time of muscle biopsy,[24,11] suggesting that they are  
8  
9 associated with chronologically more advanced disease. Therefore, the pathological findings which  
10  
11 are more abundant in IBM+RV and thought to be typical of IBM may instead be indicative of  
12  
13 chronologically more advanced disease explaining their limited sensitivity at disease presentation.  
14  
15 However, possibly due to the number of cases analysed, we were unable to confirm a relationship  
16  
17 between pathological features and clinical findings. It could be argued that biopsies from different  
18  
19 muscles may have affected the pathological findings observed and differences between IBM groups.  
20  
21 However, in a recent review of 59 muscle biopsies from IBM cases in our clinical archive with  
22  
23 quadriceps (n=31) and deltoid (n=28) biopsies we found no significant difference in the frequency of  
24  
25 pathological findings.  
26  
27

28  
29 A robust clinicopathological definition of IBM is of paramount importance for diagnosis and for  
30  
31 selection and entry of patients into clinical trials. We have shown that certain pathological findings  
32  
33 are more abundant than those included in the current pathologically-focussed diagnostic criteria.  
34  
35 Moreover, p62 immunoreactive deposits, increased MHC Class I expression, endomysial CD3+ T-  
36  
37 cells and CD8+ T-cells and COX-/SDH+ fibres have sufficient sensitivity and specificity to aid in the  
38  
39 histological differentiation of IBM from disease mimics, supporting their inclusion in future  
40  
41 diagnostic criteria for IBM alongside clinical criteria. Both CD3+ T-cells and CD8+ T-cells are  
42  
43 included in the diagnostic algorithm as there was little difference in their sensitivity and specificity for  
44  
45 differentiating IBM+RV from PAM. However, IHC staining for CD3+ T-cells is likely to be more  
46  
47 widely available and avoids the costs of extra staining to subtype the inflammatory infiltrate enabling  
48  
49 diagnostic algorithm to be used by a greater number diagnostic laboratories. Using our diagnostic  
50  
51 algorithm, we found there would be little additional diagnostic security in identifying partial invasion,  
52  
53 performing EM or staining for amyloid deposits. Finally, mitochondrial changes and MHC Class I up-  
54  
55 regulation were the most consistent findings in our IBM cases suggesting that they are central to the  
56  
57



1  
2  
3 pathogenesis and that further investigation and therapeutic intervention should be directed towards  
4  
5 these features.  
6  
7

## 8 9 REFERENCES

- 10  
11 1. Needham M, James I, Corbett A, Day T, Christiansen F, Phillips B, et al. Sporadic inclusion  
12 body myositis: phenotypic variability and influence of HLA-DR3 in a cohort of 57 Australian  
13 cases. *J Neurol Neurosurg Psychiatr*. 2008;79:1056–60.  
14
- 15 2. Griggs RC, Askanas V, DiMauro S, Engel A, Karpatai G, Mendell JR, et al. Inclusion body  
16 myositis and myopathies. *Ann Neurol*. 1995;38:705–13.  
17
- 18 3. Arahata K, Engel AG. Monoclonal antibody analysis of mononuclear cells in myopathies. I:  
19 Quantitation of subsets according to diagnosis and sites of accumulation and demonstration and  
20 counts of muscle fibers invaded by T cells. *Ann Neurol*. 1984;16:193–208.  
21
- 22 4. Mhiri C, Gherardi R. Inclusion body myositis in French patients. A clinicopathological  
23 evaluation. *Neuropathol Appl Neurobiol*. 1990;16:333–44.  
24
- 25 5. Villanova M, Kawai M, Lübke U, Oh SJ, Perry G, Six J, et al. Rimmed vacuoles of inclusion  
26 body myositis and oculopharyngeal muscular dystrophy contain amyloid precursor protein and  
27 lysosomal markers. *Brain Res*. 1993;603:343–7.  
28
- 29 6. Van der Meulen MF, Hoogendijk JE, Moons KG, Veldman H, Badrising UA, Wokke JH.  
30 Rimmed vacuoles and the added value of SMI-31 staining in diagnosing sporadic inclusion  
31 body myositis. *Neuromuscul Disord*. 2001;11:447–51.  
32
- 33 7. Ferrer I, Olivé M. Molecular pathology of myofibrillar myopathies. *Expert Rev Mol Med*.  
34 2008;10:e25.  
35
- 36 8. Amato AA, Gronseth GS, Jackson CE, Wolfe GI, Katz JS, Bryan WW, et al. Inclusion body  
37 myositis: clinical and pathological boundaries. *Ann Neurol*. 1996;40:581–6.  
38
- 39 9. Chahin N, Engel AG. Correlation of muscle biopsy, clinical course, and outcome in PM and  
40 sporadic IBM. *Neurology*. 2008;70:418–24.  
41  
42  
43  
44  
45  
46  
47  
48  
49  
50  
51  
52  
53  
54  
55  
56  
57  
58  
59  
60

10. Benveniste O, Guiguet M, Freebody J, Dubourg O, Squier W, Maisonobe T, et al. Long-term observational study of sporadic inclusion body myositis. *Brain*. 2011;134:3176–84.
11. Brady S, Squier W, Hilton-Jones D. Clinical assessment determines the diagnosis of inclusion body myositis independently of pathological features. *J Neurol Neurosurg Psychiatr*. 2013; 16.
12. Greenberg SA. Theories of the Pathogenesis of Inclusion Body Myositis. *Current Rheumatology Reports*. 2010;12:221–8.
13. Sherriff FE, Joachim CL, Squier MV, Esiri MM. Ubiquitinated inclusions in inclusion-body myositis patients are immunoreactive for cathepsin D but not  $\beta$ -amyloid. *Neuroscience Letters*. 1995;194:37–40.
14. Greenberg SA. How citation distortions create unfounded authority: analysis of a citation network. *BMJ*. 2009;339:b2680.
15. Needham M, and Mastaglia FL. (2007). Inclusion body myositis: current pathogenetic concepts and diagnostic and therapeutic approaches. *Lancet Neurol*. 6, 620–631.
16. Benveniste O, Hilton-Jones D. International Workshop on Inclusion Body Myositis held at the Institute of Myology, Paris, on 29 May 2009. *Neuromuscular Disorders*. 2010;20:414–21.
17. Wedderburn LR, Varsani H, Li CKC, Newton KR, Amato AA, Banwell B, et al. International consensus on a proposed score system for muscle biopsy evaluation in patients with juvenile dermatomyositis: a tool for potential use in clinical trials. *Arthritis Rheum*. 2007;57:1192–201.
18. Nogalska A, Terracciano C, D'Agostino C, King Engel W, Askanas V. p62/SQSTM1 is overexpressed and prominently accumulated in inclusions of sporadic inclusion-body myositis muscle fibers, and can help differentiating it from polymyositis and dermatomyositis. *Acta Neuropathol*. 2009;118:407–413.
19. Wehl CC, Temiz P, Miller SE, Watts G, Smith C, Forman M, Hanson PI, Kimonis V, Pestronk A. TDP-43 accumulation in inclusion body myopathy muscle suggests a common pathogenic mechanism with frontotemporal dementia. *J. Neurol. Neurosurg. Psychiatr*. 2008;79:1186–1189.

- 1  
2  
3 20. Banwell BL, Engel AG. Alpha B-crystallin immunolocalization yields new insights into  
4 inclusion body myositis. *Neurology*. 2000;54:1033–1041.  
5  
6  
7 21. Dubourg O, Wanschitz J, Maisonobe T, Béhin A, Allenbach Y, Herson S, and Benveniste O.  
8 Diagnostic value of markers of muscle degeneration in sporadic inclusion body myositis. *Acta*  
9 *Myol*. 2011. 30, 103–108.  
10  
11  
12 22. Hiniker A, Daniels BH, Lee HS, Margeta M. Comparative utility of LC3, p62 and TDP-43  
13 immunohistochemistry in differentiation of inclusion body myositis from polymyositis and  
14 related inflammatory myopathies. *Acta Neuropathologica Communications*. 2013. 1:29.  
15  
16  
17 23. D’Agostino C, Nogalska A, Engel WK, Askanas V. In sporadic inclusion-body myositis muscle  
18 fibres TDP-43-positive inclusions are less frequent and robust than p62-inclusions, and are not  
19 associated with paired helical filaments. *Neuropathol Appl Neurobiol*. 2010; Available from:  
20 <http://www.ncbi.nlm.nih.gov/pubmed/20626631>.  
21  
22  
23 24. Momma K, Noguchi S, Malicdan MCV, Hayashi YK, Minami N, Kamakura K, et al. Rimmed  
24 vacuoles in Becker muscular dystrophy have similar features with inclusion myopathies. *PLoS*  
25 *ONE*. 2012;7:e52002.  
26  
27  
28  
29  
30  
31  
32  
33  
34

### ACKNOWLEDGEMENTS

35  
36  
37 SB is funded by the Myositis Support Group. JLH is supported by the Reta Lila Weston Institute for  
38 Neurological Studies and the Myositis Support Group. This work was undertaken at UCLH/UCL who  
39 received a proportion of funding from the Department of Health’s NIHR Biomedical Research  
40 Centres funding scheme.  
41  
42  
43  
44  
45  
46  
47

### CONTRIBUTORSHIP STATEMENT

48  
49 Dr Stefen Brady - Acquisition of data, analysis and interpretation of data and drafting of manuscript.  
50  
51 Dr Waney Squier - Critical revision of manuscript for important intellectual content.  
52  
53 Prof. Caroline Sewry - Study concept and design and critical revision of manuscript for important  
54 intellectual content.  
55  
56  
57  
58  
59  
60

1  
2  
3 Prof. Mike Hanna - Critical revision of manuscript for important intellectual content.

4 Dr David Hilton-Jones - Critical revision of manuscript for important intellectual content.

5  
6  
7 Dr Janice Holton - Study concept and design, critical revision of manuscript for important intellectual  
8  
9 content and study supervision.

## 10 11 12 13 **DATA SHARING**

14 All additional data can be found in supplementary tables and figures.

### 15 16 17 **Supplementary Figure 1 Control staining in brain and muscle tissue**

18  
19 Positive and negative (no primary) brain control sections and normal muscle stained using  
20 immunohistochemistry for: p62 (A-C), TDP-43 (D-F),  $\alpha$  B-crystallin (G-I), ubiquitin (J-K) and  
21 myotilin (M,N) and alkalised congo red (O).  
22  
23

24 (A-C) Negative (A) and positive (B) control sections of AD brain and normal muscle (C) stained for  
25 p62. Positive control shows p62 positive neurofibrillary tangles and dystrophic neurites (B). No p62  
26 immunoreactivity is observed in normal muscle (C).  
27

28 (D-F) Negative (D) and positive (E) control sections of FTLD-TDP brain and normal muscle (F)  
29 stained for TDP-43. Positive control shows normal nuclear labelling and mislocalised neuronal  
30 cytoplasmic staining with neuropil threads (E). Insert shows a neuron with absent nuclear TDP-43 and  
31 a cytoplasmic TDP-43 inclusion (E, red arrow and x100 insert). Nuclear TDP-43 staining is observed  
32 in normal muscle.  
33  
34

35 (G-I) Negative (G) and positive (H) control sections of CBD brain and normal muscle (I) stained for  $\alpha$   
36 B-crystallin. Positive control shows neuropil threads and a balloon cell neuron (H; red arrow and x100  
37 insert). No  $\alpha$  B-crystallin immunoreactivity is observed in normal muscle (I).  
38  
39

40 (J-L) Negative (J) and positive (K) control AD brain and normal muscle (L) stained for ubiquitin.  
41 Positive control shows dystrophic neurites and neuropil threads (K). No ubiquitin immunoreactivity is  
42 observed in normal muscle (L).  
43  
44

45 (M,N) Negative (M) and positive (N) control muscle stained for myotilin. Mild sarcoplasmic staining  
46 is observed in normal muscle (N).  
47

48 (O) Positive control section of AD brain showing an amyloid plaque (O).  
49

50 Scale bar represents 100  $\mu$ m in A-D, F and H-M; and 50  $\mu$ m in E, N-O.

51 p62 = Sequestosome 1; AD = Alzheimer's disease; TDP-43 = Transactivation response DNA binding  
52 protein 43; FTLD-TDP = Frontotemporal lobar degeneration with TDP-43 positive inclusions; CBD =  
53 Corticobasal degeneration.  
54  
55  
56  
57  
58  
59  
60

### Supplementary Figure 2 IBM inflammatory score-tool

Score tool modified from the published juvenile dermatomyositis inflammatory (JDM) score tool [17] to specifically assess the type, degree and distribution of inflammation in IBM. The inflammatory domain was augmented to include T-cells, T-cell subtypes, B-cells and macrophages. MHC Class I staining was expanded to include three patterns of labelling. The vascular, muscle fibre and connective tissue domains which are present in the JDM score tool were not included.

### Figure 1 Protein aggregates and congophilic deposits in IBM

Stained cryostat sections, showing fibres, often in clusters, containing protein aggregates stained for p62 (A), TDP-43 (B), ubiquitin (C),  $\alpha$ B-crystallin (D) and myotilin (E). Protein aggregates were present throughout fibres, and were observed in apparently normal fibres, vacuolated fibres and fibres surrounded by inflammatory infiltrates. In fibres containing TDP-43 aggregates, myonuclear TDP-43 staining was frequently reduced (B). Congophilic deposits were observed in vacuolated fibres using epifluorescence (F). Tissue sections were examined using both the rhodamine red and fluorescein isothiocyanate filters to exclude areas of auto-fluorescence (arrow). Combined fluorescent image is shown. Four patterns of immunoreactivity were observed in IBM and disease controls stained for p62 using IHC (G)(H)(I)(J). Pattern I (G) - strongly stained, discrete and clearly delineated, round or angular aggregates, variable in number and size within a muscle fibre but rarely filling it and predominantly located subsarcolemmal, but also perinuclear and adjacent to vacuoles. Pattern II (H) - large aggregates of variable staining intensity. Pattern III (I) - fine granular aggregates dispersed throughout the fibre. Pattern IV (J) - fine granules and wisps of p62 immunoreactivity set within weakly basophilic inclusions.

Scale bar represents 50  $\mu$ m in A and D; 25  $\mu$ m in B, C and E-J.

1  
2  
3 **Figure 2 Percentage of muscle fibres containing protein aggregates and Griggs' pathological**  
4 **features**

5  
6  
7 Box and whisker plot illustrating the percentage of muscle fibres containing pathological  
8 abnormalities contained in the Griggs criteria and protein aggregates in Griggs' pathologically-  
9 definite IBM. Fibres containing aggregates immunoreactive for p62 and  $\alpha$ B-crystallin were more  
10 frequent than those containing the current diagnostic pathological features (red bars) ( $p < 0.05$ ). Protein  
11 aggregates recognised by all antibodies were found in a significantly larger number of fibres than  
12 partial invasion ( $p < 0.02$ ).  
13  
14  
15  
16  
17  
18  
19

20  
21 **Figure 3 Percentage of fibres containing protein aggregates and COX-/SDH+ fibres in each**  
22 **group**

23  
24  
25 Box and whisker plots illustrating the percentage of fibres in each diagnostic category containing p62  
26 (A), TDP-43 (B), myotilin (C) and ubiquitin (D) immunoreactive aggregates, congophilic deposits (E)  
27 and COX-/SDH+ fibres (F). All protein aggregates were present in a greater percentage of fibres in  
28 IBM+RV than in IBM-RV. There was no difference in the percentage of COX-/SDH+ muscle fibres  
29 between these groups. IBM+RV biopsies had a greater percentage of fibres containing p62 (A) and  
30 TDP-43 (B) immunoreactive aggregates and COX-/SDH+ fibres (F) than PAM. Pathological findings  
31 were similar in IBM-RV and PM&DM, with no differences in the percentage of fibres containing p62  
32 (A), TDP-43 (B) and ubiquitin (D) immunoreactive aggregates or congophilic deposits (E). However,  
33 there was a greater percentage of COX-/SDH+ fibres (F) in IBM-RV than PM&DM and a greater  
34 percentage of fibres containing myotilin immunoreactive aggregates (C) in PM&DM than IBM-RV.  
35  
36  
37  
38  
39  
40  
41  
42  
43  
44  
45  
46 \*Statistically significant results.  
47  
48

49 **Supplementary Figure 3 Sensitivity and specificity of rimmed vacuoles, protein aggregates and**  
50 **mitochondrial changes in IBM+RV compared to PAM**

51  
52 Receiver operating characteristic curves for each test including the area under the curve and optimum  
53 cut-off with its associated sensitivity and specificity for rimmed vacuoles (A), myotilin (B), ubiquitin  
54 (C), TDP-43 (D), p62 (E) immunoreactive deposits, congophilic deposits (F) and COX-/SDH+ fibres  
55  
56  
57  
58  
59  
60

1  
2  
3 (G). COX/SDH HC staining was the most discriminative test for differentiating IBM+RV and PAM  
4  
5 (G). However, there was little difference between COX/SDH HC staining, TDP-43 and p62 IHC  
6  
7 staining and none were sufficiently discriminative to be considered diagnostic. AUC = Area under the  
8  
9 curve.  
10

#### 11 12 13 **Supplementary Figure 4 Sensitivity and specificity of protein aggregates and mitochondrial** 14 **changes in IBM-RV compared to PM&DM**

15  
16 Receiver operating characteristic curves for each test showing the area under the curve and optimum  
17  
18 cut-off with its sensitivity and specificity for myotilin (A), ubiquitin (B), TDP-43 (C), p62 (D)  
19  
20 immunoreactive deposits, congophilic deposits (E) and COX-/SDH+ fibres (F). COX/SDH  
21  
22 histochemical staining (F) and myotilin (G) IHC were the most discriminative tests for differentiating  
23  
24 IBM-RV and PM&DM. AUC = Area under the curve.  
25  
26  
27  
28

#### 29 **Figure 4 Proposed diagnostic algorithm for IBM based on pathological findings**

30  
31 Flow diagram showing a proposed pathway for diagnosing IBM based on the pathological findings.  
32  
33 Increased MHC Class I staining was observed in all cases of IBM and pattern I p62 aggregates in all  
34  
35 cases of IBM+RV making them good initial screening tests. Their absence rules-out a diagnosis of  
36  
37 IBM and IBM+RV respectively. The presence of **endomysial CD3+ T-cell score >1**, endomysial  
38  
39 **CD8+ T-cell score >0** or strong MHC Class I staining in a biopsy with rimmed vacuoles and p62  
40  
41 aggregates secures a diagnosis of IBM+RV. Differentiating IBM-RV and PM&DM pathologically is  
42  
43 more challenging. The presence of COX-/SDH+ fibres is not specific to IBM-RV; **although COX-**  
44  
45 **/SDH+ fibres were not present in every case of IBM-RV their absence casts doubt on the diagnosis of**  
46  
47 **IBM-RV**. Pattern I p62 aggregates may enable IBM to be differentiated from PM when present.  
48  
49 However, they may lack sensitivity for IBM-RV, therefore their absence does not rule out the  
50  
51 diagnosis.  
52  
53  
54  
55  
56  
57  
58  
59  
60



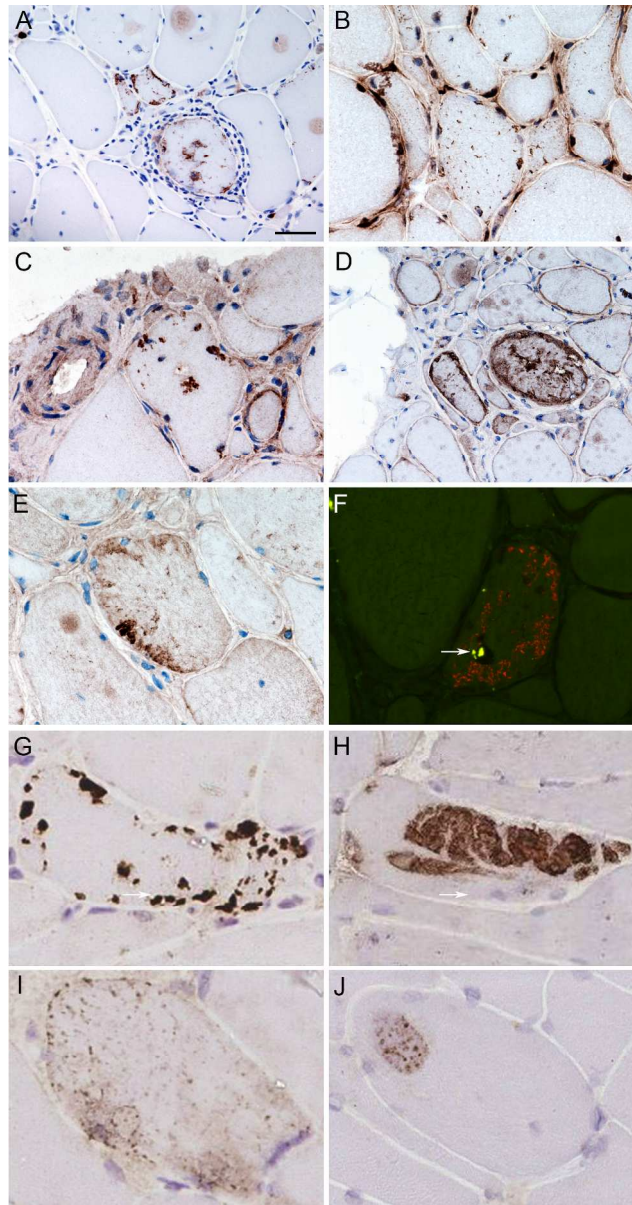

Figure 1 Protein aggregates and congophilic deposits in IBM

Stained cryostat sections, showing fibres, often in clusters, containing protein aggregates stained for p62

(A), TDP-43 (B), ubiquitin (C),  $\alpha$ B-crystallin (D) and myotilin (E). Protein aggregates were present throughout fibres, and were observed in apparently normal fibres, vacuolated fibres and fibres surrounded by inflammatory infiltrates. In fibres containing TDP-43 aggregates, myonuclear TDP-43 staining was frequently reduced (B). Congophilic deposits were observed in vacuolated fibres using epifluorescence (F).

Tissue sections were examined using both the rhodamine red and fluorescein isothiocyanate filters to exclude areas of auto-fluorescence (arrow). Combined fluorescent image is shown. Four patterns of immunoreactivity were observed in IBM and disease controls stained for p62 using IHC (G)(H)(I)(J). Pattern I (G) - strongly stained, discrete and clearly delineated, round or angular aggregates, variable in number and size within a muscle fibre but rarely filling it and predominantly located subsarcolemmal, but also perinuclear and adjacent to vacuoles. Pattern II (H) - large aggregates of variable staining intensity. Pattern III (I) - fine granular aggregates dispersed throughout the fibre. Pattern IV (J) - fine granules and wisps of



1  
2  
3  
4  
5  
6  
7  
8  
9  
10  
11  
12  
13  
14  
15  
16  
17  
18  
19  
20  
21  
22  
23  
24  
25  
26  
27  
28  
29  
30  
31  
32  
33  
34  
35  
36  
37  
38  
39  
40  
41  
42  
43  
44  
45  
46  
47  
48  
49  
50  
51  
52  
53  
54  
55  
56  
57  
58  
59  
60

p62 immunoreactivity set within weakly basophilic inclusions.  
Scale bar represents 50 µm in A and D; 25 µm in B, C and E-J.

161x305mm (300 x 300 DPI)

For peer review only



Figure 2 Percentage of muscle fibres containing protein aggregates and Griggs' pathological features Box and whisker plot illustrating the percentage of muscle fibres containing pathological abnormalities contained in the Griggs criteria and protein aggregates in Griggs' pathologically-definite IBM. Fibres containing aggregates immunoreactive for p62 and  $\alpha$ B-crystallin were more frequent than those containing the current diagnostic pathological features (red bars) ( $p < 0.05$ ). Protein aggregates recognised by all antibodies were found in a significantly larger number of fibres than partial invasion ( $p < 0.02$ ).

97x99mm (300 x 300 DPI)

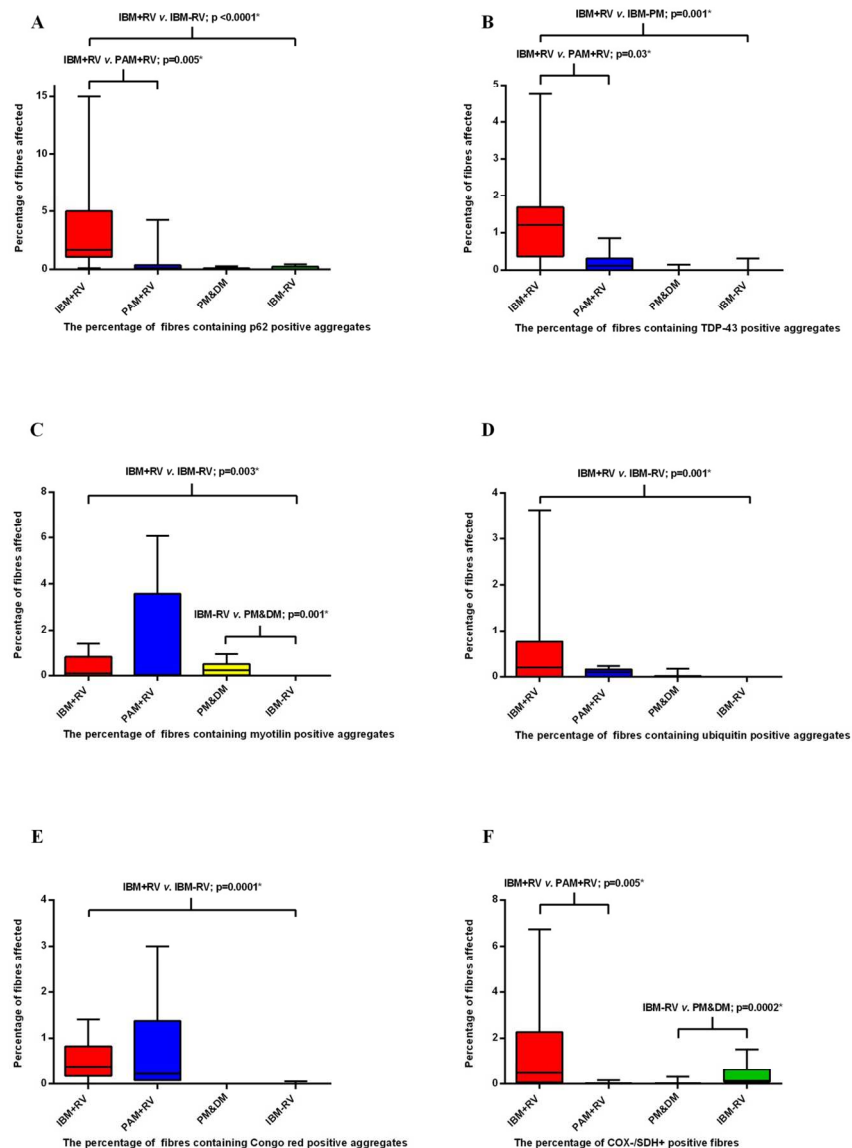

Figure 3 Percentage of fibres containing protein aggregates and COX-/SDH+ fibres in each group. Box and whisker plots illustrating the percentage of fibres in each diagnostic category containing p62 (A), TDP-43 (B), myotilin (C) and ubiquitin (D) immunoreactive aggregates, congophilic deposits (E) and COX-/SDH+ fibres (F). All protein aggregates were present in a greater percentage of fibres in IBM+RV than in IBM-RV. There was no difference in the percentage of COX-/SDH+ muscle fibres between these groups. IBM+RV biopsies had a greater percentage of fibres containing p62 (A) and TDP-43 (B) immunoreactive aggregates and COX-/SDH+ fibres (F) than PAM. Pathological findings were similar in IBM-RV and PM&DM, with no differences in the percentage of fibres containing p62 (A), TDP-43 (B) and ubiquitin (D) immunoreactive aggregates or congophilic deposits (E). However, there was a greater percentage of COX-/SDH+ fibres (F) in IBM-RV than PM&DM and a greater percentage of fibres containing myotilin immunoreactive aggregates (C) in PM&DM than IBM-RV. \*Statistically significant results.

168x226mm (300 x 300 DPI)

1  
2  
3  
4  
5  
6  
7  
8  
9  
10  
11  
12  
13  
14  
15  
16  
17  
18  
19  
20  
21  
22  
23  
24  
25  
26  
27  
28  
29  
30  
31  
32  
33  
34  
35  
36  
37  
38  
39  
40  
41  
42  
43  
44  
45  
46  
47  
48  
49  
50  
51  
52  
53  
54  
55  
56  
57  
58  
59  
60

For peer review only

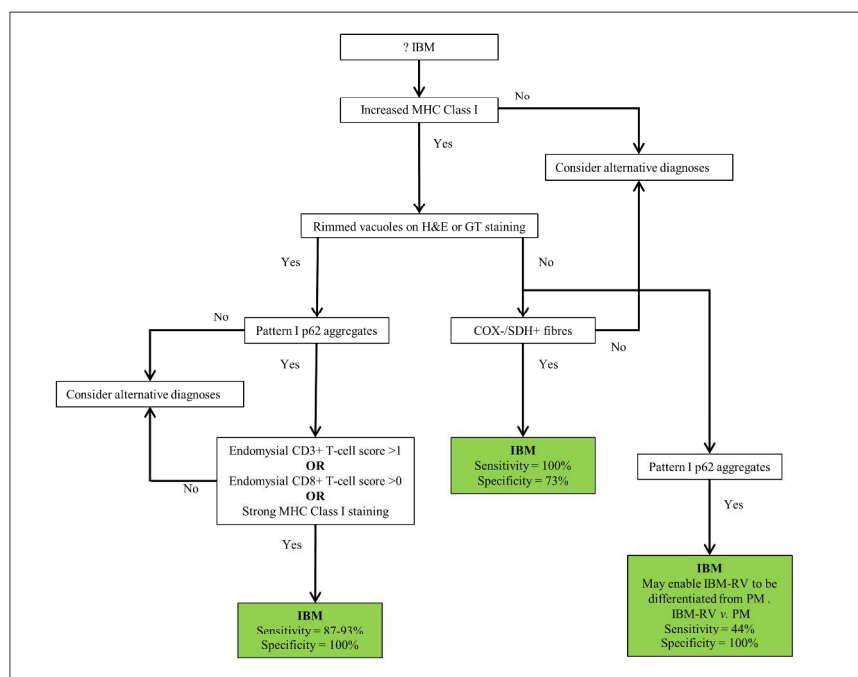

Figure 4 Proposed diagnostic algorithm for IBM based on pathological findings

Flow diagram showing a proposed pathway for diagnosing IBM based on the pathological findings. Increased MHC Class I staining was observed in all cases of IBM and pattern I p62 aggregates in all cases of IBM+RV making them good initial screening tests. Their absence rules-out a diagnosis of IBM and IBM+RV respectively. The presence of endomysial CD3+ T-cell score >1, endomysial CD8+ T-cell score >0 or strong MHC Class I staining in a biopsy with rimmed vacuoles and p62 aggregates secures a diagnosis of IBM+RV. Differentiating IBM-RV and PM&DM pathologically is more challenging. The presence of COX-/SDH+ fibres is not specific to IBM-RV; although COX-/SDH+ fibres were not present in every case of IBM-RV their absence casts doubt on the diagnosis of IBM-RV. Pattern I p62 aggregates may enable IBM to be differentiated from PM when present. However, they may lack sensitivity for IBM-RV, therefore their absence does not rule out the diagnosis.

254x190mm (300 x 300 DPI)

**Supplementary Table 1 Clinical characteristics**

| Characteristic                               | G-IBM              | IBM+RV             | IBM-RV            | PM&DM              | PAM                | IBM+RV*          | IBM-RV*          |
|----------------------------------------------|--------------------|--------------------|-------------------|--------------------|--------------------|------------------|------------------|
| Number of cases                              | 6                  | 15                 | 9                 | 11                 | 7                  | 12               | 11               |
| Male:female                                  | 5:1                | 10:5               | 4:5               | 4:3                | 4:7                | 10:2             | 9:2              |
| Median age at symptom onset, years (IQR)     | 69 (66-70)         | 54 (49-67)         | 62 (48-68)        | 55 (34-65)         | 46 (24-54)         | 58 (55-73)       | 60 (57-72)       |
| Median age at muscle biopsy, years (IQR)     | 77 (68-78)         | 64 (59-71)         | 68 (47-74)        | 55 (34-65)         | 54 (29-59)         | 66 (62-77)       | 70 (63-74)       |
| Median duration of symptoms, years (IQR)     | 5 (3-9)            | 5 (4-7)            | 3 (2-8)           | 0 (0-0)            | 5 (3-9)            | 5 (4-7)          | 4 (3-7)          |
| Mean creatine kinase, IU/L, mean ( $\pm$ SD) | 377 ( $\pm$ 213)   | 1748 ( $\pm$ 1348) | 926 ( $\pm$ 800)  | 6744 ( $\pm$ 5875) | 739 ( $\pm$ 320)   | 662 ( $\pm$ 360) | 466 ( $\pm$ 338) |
| Mean number of muscle fibres per biopsy      | 2929 ( $\pm$ 1357) | 1463 ( $\pm$ 954)  | 1795 ( $\pm$ 990) | 3534 ( $\pm$ 1934) | 2749 ( $\pm$ 1357) | NA               | NA               |

G-IBM = Griggs' pathologically-definite IBM; IQR = Interquartile range; SD = Standard deviation; NA = Not applicable. \*Cases used to test proposed diagnostic flow-chart.

Supplementary Table 2 Clinical inclusion criteria

| Diagnostic category | Criteria                                                                                                                                                                                                                                                                                                                                                                                                                                                                                                            |
|---------------------|---------------------------------------------------------------------------------------------------------------------------------------------------------------------------------------------------------------------------------------------------------------------------------------------------------------------------------------------------------------------------------------------------------------------------------------------------------------------------------------------------------------------|
| G-IBM               | Patients fulfilling Griggs' definite criteria (rimmed vacuoles, inflammatory infiltrate with partial invasion of fibres and 15-18 nm tubulofilaments on EM) with prominent finger flexor and knee extensor weakness and CK <12 x ULN.                                                                                                                                                                                                                                                                               |
| IBM+RV              | Age at symptom onset >45 years, symptoms present for >12 months, finger flexion strength less than shoulder abduction strength and knee extension weakness greater than hip flexion weakness, CK ≤15 x ULN and a muscle biopsy revealing rimmed vacuoles on H&E or GT stained sections without features inconsistent with IBM on a standard diagnostic histological assessment <b>for an inflammatory myopathy*</b> .                                                                                               |
| IBM-RV              | Clinical features and CK as detailed under IBM+RV. Rimmed vacuoles absent on H&E and GT stained sections and without features inconsistent with IBM on a standard diagnostic histological assessment <b>for an inflammatory myopathy*</b> .                                                                                                                                                                                                                                                                         |
| PAM                 | Genetically or clinically and pathologically confirmed cases of PAM with typical rimmed vacuoles present on muscle biopsy <b>and a genetically confirmed dystrophinopathy with typical rimmed vacuoles and protein aggregates present on muscle biopsy</b> . Cases included myotilinopathy (n=2), hIBM with compound heterozygous mutations in GNE (n=1), IBMPFD with mutation in VCP (n=1), genetically unconfirmed cases of myofibrillar myopathy (n=2), and dystrophinopathy with deletion of exons 45-47 (n=1). |
| PM&DM               | Subacute onset of limb girdle weakness, significantly raised CK, inflammatory cell infiltrate present on muscle biopsy and a sustained unequivocal clinical and biochemical response to steroid immunosuppression. DM cases also had to have cutaneous manifestations consistent with the diagnosis.                                                                                                                                                                                                                |
| Normal controls     | Patients investigated for cramps or fatigue, normal clinical examination performed by a muscle specialist, normal CK, normal neurophysiological assessment and normal muscle biopsy.                                                                                                                                                                                                                                                                                                                                |

G-IBM = Griggs' pathologically-definite IBM; IBM+RV = Clinically-typical IBM with rimmed vacuoles; IBM-RV = Clinically typical IBM lacking rimmed vacuoles; PAM = Protein accumulation myopathies with rimmed vacuoles; PM&DM = Steroid-responsive inflammatory myopathies; hIBM = Hereditary inclusion body myopathy; IBMPFD = Inclusion body myopathy with Paget's disease and frontotemporal dementia; CK = Creatine kinase; GT = Gomori trichrome; ULN = Upper limit of normal. **\* Standard histological assessment for inflammatory myopathy includes H&E, GT, Sudan black or oil red O, periodic acid Schiff, nicotinamide adenine dinucleotide dehydrogenase, succinate dehydrogenase, cytochrome c oxidase, combined cytochrome c oxidase and succinate dehydrogenase, phosphorylase, acid and alkaline phosphatase, adenylate deaminase, ATPases at pH 4.2/4.3/9.4 and immunohistochemical staining including neonatal myosin, utrophin, major histocompatibility complex class I, membrane attack complex and a combination of inflammatory cell markers.**

Supplementary Table 3 Antibodies and optimum staining conditions

| Antibody                | Source            | Clone | Control tissue | Fixative   | Dilution | Primary incubation conditions† |
|-------------------------|-------------------|-------|----------------|------------|----------|--------------------------------|
| p62                     | BD Transduction   | 3/P62 | AD brain       | A          | 1:400    | 1 hour, RT                     |
| TDP-43                  | Proteintech       | NA    | FTLD-TDP brain | PFA        | 1:800    | 24 hours, 4°C                  |
| Tau*                    | Dako              | NA    | AD brain       | A          | 1:1600   | 1 hour, RT                     |
| Phosphorylated tau**    | Autogen Bioclear  | AT8   | AD brain       | A          | 1:1600   | 1 hour, RT                     |
| Ubiquitin               | Dako              | NA    | AD brain       | A          | 1:100    | 1 hour, RT                     |
| A $\beta$               | Dako              | 6F/3D | AD brain       | PFA and FA | 1:100    | 1 hour, RT                     |
| $\alpha$ -synuclein     | Abcam             | 4D6   | MSA brain      | PBS        | 1:800    | 1 hour, RT                     |
| FUS                     | Novus Biologicals | NA    | FTLD-FUS brain | A          | 1:2000   | 1 hour, RT                     |
| Desmin                  | Dako              | D33   | Normal muscle  | A          | 1:50     | 24 hours, 4°C                  |
| Myotilin                | Novocastra        | RSO34 | Normal muscle  | A          | 1:500    | 24 hours, 4°C                  |
| $\alpha$ B-crystallin   | Novocastra        | G2JF  | CBD brain      | A          | 1:300    | 1 hour, RT                     |
| VCP                     | Abcam             | 5     | Normal muscle  | A          | 1:100    | 1 hour, RT                     |
| Lamin A/C               | Novocastra        | 636   | Normal muscle  | A          | 1:50     | 1 hour, RT                     |
| Emerin                  | Novocastra        | 4G5   | Normal muscle  | A          | 1:400    | 1 hour, RT                     |
| MHC Class I             | Novocastra        | W6/32 | Normal muscle  | A          | 1:25     | 24 hours, 4°C                  |
| CD3 (T-cells)           | Novocastra        | UCHT1 | Tonsil         | A          | 1:100    | 1 hour, RT                     |
| CD4 (Helper T-cells)    | Novocastra        | 4B12  | Tonsil         | A          | 1:400    | 1 hour, RT                     |
| CD8 (Cytotoxic T-cells) | Novocastra        | 1A5   | Tonsil         | A          | 1:50     | 1 hour, RT                     |
| CD20 (B-cells)          | Novocastra        | L26   | Tonsil         | A          | 1:400    | 1 hour, RT                     |
| CD68 (Macrophages)      | Novocastra        | KP1   | Tonsil         | A          | 1:1600   | 1 hour, RT                     |

NA = Not applicable; AD = Alzheimer's disease; FTLD-TDP = Frontotemporal lobar degeneration with TDP-43 positive inclusions; MSA = Multiple system atrophy; FTLD-FUS = Frontotemporal lobar degeneration with FUS positive inclusions; CBD = Corticobasal degeneration; A = Acetone; PFA = 4% Paraformaldehyde; FA = Formic acid; PBS = Phosphate buffered saline; RT = Room temperature. Antibodies were directed at \* amino acids 243-441 irrespective of phosphorylation and \*\* phosphorylated Ser202. †Primary antibodies were made up in PBS and primary antibody-antigen binding was visualised with Dako REAL™ EnVision™ Detection System which includes a horseradish-peroxidase labelled goat anti-rabbit/mouse secondary and 1:50 solution of 3,3'-diaminobenzidine as the chromagen.



1  
2  
3 **Supplementary Table 4 Definitions of pathological features**  
4  
5

| Pathological feature                         | Definition                                                                                                                                                                                                                                                                                                                                                                                                                                                                                                        |
|----------------------------------------------|-------------------------------------------------------------------------------------------------------------------------------------------------------------------------------------------------------------------------------------------------------------------------------------------------------------------------------------------------------------------------------------------------------------------------------------------------------------------------------------------------------------------|
| Rimmed vacuoles                              | Irregular vacuole with a granular basophilic rim or containing granular basophilic material when stained with H&E or stained red in the GT. Both H&E and GT stained sections were reviewed before concluding the absence of rimmed vacuoles.                                                                                                                                                                                                                                                                      |
| Inflammatory infiltrate and partial invasion | Inflammatory cells must show a nucleus fully circumscribed by a ring of positive staining. T-cells and B-cells must have a lymphoid morphology. Partial invasion was defined as unequivocal invasion of an otherwise structurally normal fibre by one or more inflammatory cells on H&E stained sections or sections stained using IHC.                                                                                                                                                                           |
| Protein aggregates                           | Area of definite staining within a transversely orientated muscle fibre. Diffuse staining affecting the whole of a fibre was not counted nor were protein aggregates in necrotic fibres or regenerating fibres.                                                                                                                                                                                                                                                                                                   |
| Congophilic deposits                         | Assessed using polarising and fluorescence microscopes. Positive staining using a polarising microscope was defined as congophilic deposits within a muscle fibre that exhibited apple-green birefringence under polarised light. Positive staining with a fluorescence microscope was defined as fluorescent material within a muscle fibre only visible under the rhodamine red filter. Areas of auto-fluorescence were excluded by visualising areas of fluorescence with both rhodamine red and FITC filters. |

24  
25  
26 GT = Gomori trichrome; FITC = Fluorescein isothiocyanate.  
27  
28  
29  
30  
31  
32  
33  
34  
35  
36  
37  
38  
39  
40  
41  
42  
43  
44  
45  
46  
47  
48  
49  
50  
51  
52  
53  
54  
55  
56  
57  
58  
59  
60

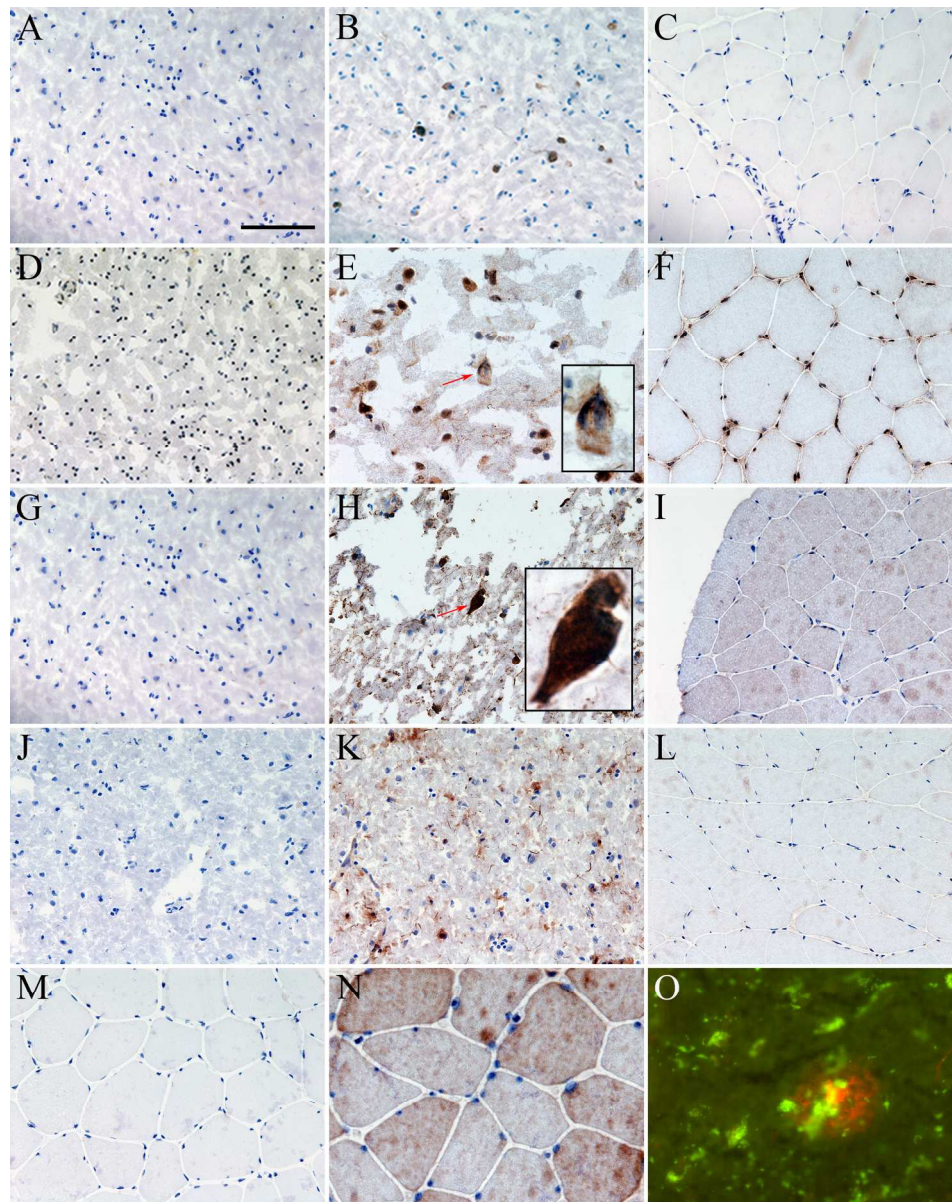

Supplementary Figure 1 Control staining in brain and muscle tissue

Positive and negative (no primary) brain control sections and normal muscle stained using immunohistochemistry for: p62 (A-C), TDP-43 (D-F), a B-crystallin (G-I), ubiquitin (J-K) and myotilin (M,N) and alkalised congo red (O).

(A-C) Negative (A) and positive (B) control sections of AD brain and normal muscle (C) stained for p62. Positive control shows p62 positive neurofibrillary tangles and dystrophic neurites (B). No p62 immunoreactivity is observed in normal muscle (C).

(D-F) Negative (D) and positive (E) control sections of FTLD-TDP brain and normal muscle (F) stained for TDP-43. Positive control shows normal nuclear labelling and mislocalised neuronal cytoplasmic staining with neuropil threads (E). Insert shows a neuron with absent nuclear TDP-43 and a cytoplasmic TDP-43 inclusion (E, red arrow and x100 insert). Nuclear TDP-43 staining is observed in normal muscle.

(G-I) Negative (G) and positive (H) control sections of CBD brain and normal muscle (I) stained for a B-crystallin. Positive control shows neuropil threads and a balloon cell neuron (H; red arrow and x100 insert).

1  
2  
3 No  $\alpha$  B-crystallin immunoreactivity is observed in normal muscle (I).  
4 (J-L) Negative (J) and positive (K) control AD brain and normal muscle (L) stained for ubiquitin. Positive  
5 control shows dystrophic neurites and neuropil threads (K). No ubiquitin immunoreactivity is observed in  
6 normal muscle (L).

7 (M,N) Negative (M) and positive (N) control muscle stained for myotilin. Mild sarcoplasmic staining is  
8 observed in normal muscle (N).

9 (O) Positive control section of AD brain showing an amyloid plaque (O).

10 Scale bar represents 100  $\mu$ m in A-D, F and H-M; and 50  $\mu$ m in E, N-O.

11 p62 = Sequestosome 1; AD = Alzheimer's disease; TDP-43 = Transactivation response DNA binding protein  
12 43; FTL-D-TDP = Frontotemporal lobar degeneration with TDP-43 positive inclusions; CBD = Corticobasal  
13 degeneration.

14 171x215mm (300 x 300 DPI)

15  
16  
17  
18  
19  
20  
21  
22  
23  
24  
25  
26  
27  
28  
29  
30  
31  
32  
33  
34  
35  
36  
37  
38  
39  
40  
41  
42  
43  
44  
45  
46  
47  
48  
49  
50  
51  
52  
53  
54  
55  
56  
57  
58  
59  
60

For peer review only

1  
2  
3  
4  
5  
6  
7  
8  
9  
10  
11  
12  
13  
14  
15  
16  
17  
18  
19  
20  
21  
22  
23  
24  
25  
26  
27  
28  
29  
30  
31  
32  
33  
34  
35  
36  
37  
38  
39  
40  
41  
42  
43  
44  
45  
46  
47  
48  
49  
50  
51  
52  
53  
54  
55  
56  
57  
58  
59  
60

**IBM Inflammatory Score Tool**

Case Number: \_\_\_\_\_ Date: \_\_\_\_\_

|                                 | Score   | Description                                                                                                                                                                                                                                                                                                                                                                                   |
|---------------------------------|---------|-----------------------------------------------------------------------------------------------------------------------------------------------------------------------------------------------------------------------------------------------------------------------------------------------------------------------------------------------------------------------------------------------|
| <b>T-cells (CD3)</b>            |         |                                                                                                                                                                                                                                                                                                                                                                                               |
| CD3+ endomysial infiltration    | 0, 1, 2 | For each inflammatory cell type in the endomysial, perimysial and perivascular locations score positive infiltrating cells as follows: if none or <4 cells in a x20 field- score 0; if >4 cells in a x20 field and/or 1 cluster (where a cluster is ≥10 cells) - score 1; if >2 clusters in the entire biopsy, and/or diffusely infiltrating cells (i.e.> 20 cells in a x20 field) - score 2. |
| CD3+ perimysial infiltration    | 0, 1, 2 |                                                                                                                                                                                                                                                                                                                                                                                               |
| CD3+ perivascular infiltration  | 0, 1, 2 |                                                                                                                                                                                                                                                                                                                                                                                               |
| <b>Helper T-cells (CD4)</b>     |         |                                                                                                                                                                                                                                                                                                                                                                                               |
| CD4+ endomysial infiltration    | 0, 1, 2 |                                                                                                                                                                                                                                                                                                                                                                                               |
| CD4+ perimysial infiltration    | 0, 1, 2 |                                                                                                                                                                                                                                                                                                                                                                                               |
| CD4+ perivascular infiltration  | 0, 1, 2 |                                                                                                                                                                                                                                                                                                                                                                                               |
| <b>Cytotoxic T-cells (CD8)</b>  |         |                                                                                                                                                                                                                                                                                                                                                                                               |
| CD8+ endomysial infiltration    | 0, 1, 2 |                                                                                                                                                                                                                                                                                                                                                                                               |
| CD8+ perimysial infiltration    | 0, 1, 2 |                                                                                                                                                                                                                                                                                                                                                                                               |
| CD8+ perivascular infiltration  | 0, 1, 2 |                                                                                                                                                                                                                                                                                                                                                                                               |
| <b>B-cells (CD20)</b>           |         |                                                                                                                                                                                                                                                                                                                                                                                               |
| CD20+ endomysial infiltration   | 0, 1, 2 |                                                                                                                                                                                                                                                                                                                                                                                               |
| CD20+ perimysial infiltration   | 0, 1, 2 |                                                                                                                                                                                                                                                                                                                                                                                               |
| CD20+ perivascular infiltration | 0, 1, 2 |                                                                                                                                                                                                                                                                                                                                                                                               |
| <b>Macrophages (CD68)</b>       |         |                                                                                                                                                                                                                                                                                                                                                                                               |
| CD68+ endomysial infiltration   | 0, 1, 2 |                                                                                                                                                                                                                                                                                                                                                                                               |
| CD68+ perimysial infiltration   | 0, 1, 2 |                                                                                                                                                                                                                                                                                                                                                                                               |
| CD68+ perivascular infiltration | 0, 1, 2 |                                                                                                                                                                                                                                                                                                                                                                                               |
| MHC Class I                     | 0, 1, 2 | For the whole biopsy score as follows: normal (capillary staining only) - score 0; if increased: i) mildly (weak diffuse sarcolemmal staining or scattered positive muscle fibres) - score 1; ii) strongly increased (diffuse definite sarcoplasmic and sarcolemmal increase in staining) score 2.                                                                                            |

Supplementary Figure 2 IBM inflammatory score-tool  
 Score tool modified from the published juvenile dermatomyositis inflammatory (JDM) score tool [17] to specifically assess the type, degree and distribution of inflammation in IBM. The inflammatory domain was augmented to include T-cells, T-cell subtypes, B-cells and macrophages. MHC Class I staining was expanded to include three patterns of labelling. The vascular, muscle fibre and connective tissue domains which are present in the JDM score tool were not included.

188x255mm (300 x 300 DPI)

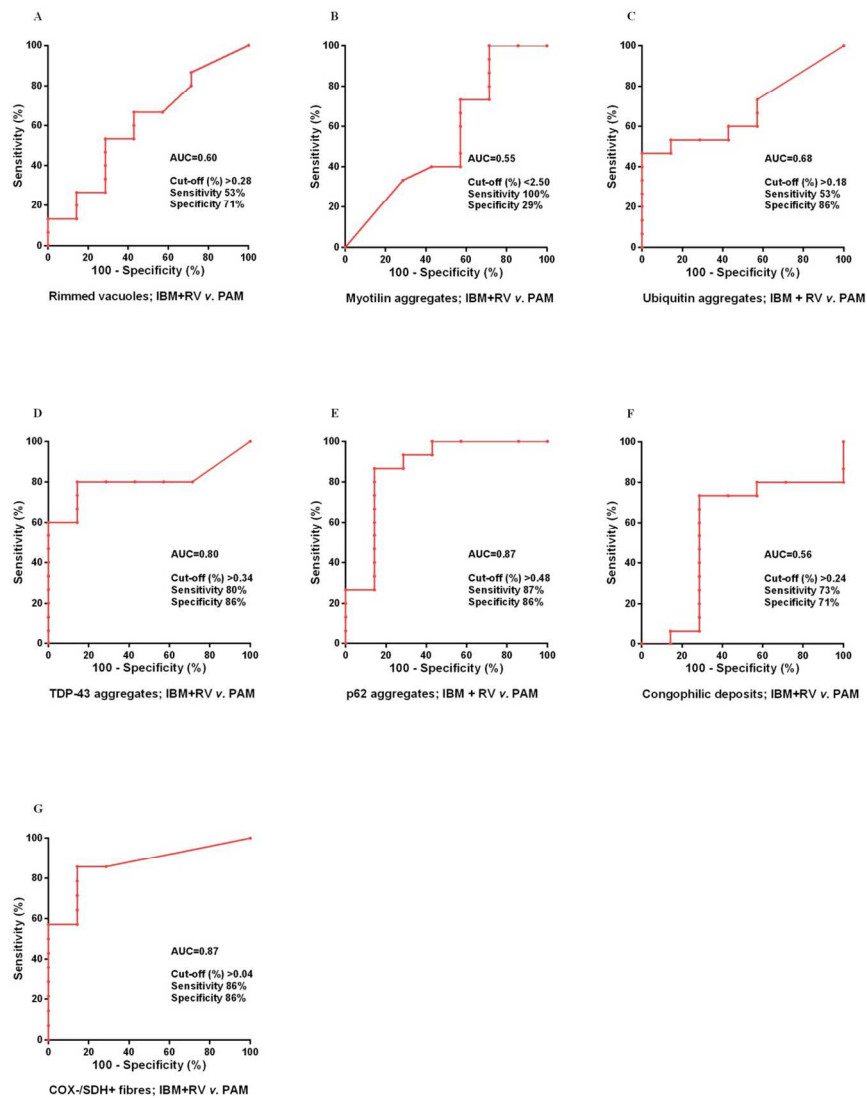

Supplementary Figure 3 Sensitivity and specificity of rimmed vacuoles, protein aggregates and mitochondrial changes in IBM+RV compared to PAM

Receiver operating characteristic curves for each test including the area under the curve and optimum cut-off with its associated sensitivity and specificity for rimmed vacuoles (A), myotilin (B), ubiquitin (C), TDP-43 (D), p62 (E) immunoreactive deposits, congophilic deposits (F) and COX-/SDH+ fibres (G). COX/SDH HC staining was the most discriminative test for differentiating IBM+RV and PAM (G). However, there was little difference between COX/SDH HC staining, TDP-43 and p62 IHC staining and none were sufficiently discriminative to be considered diagnostic. AUC = Area under the curve.

165x211mm (300 x 300 DPI)



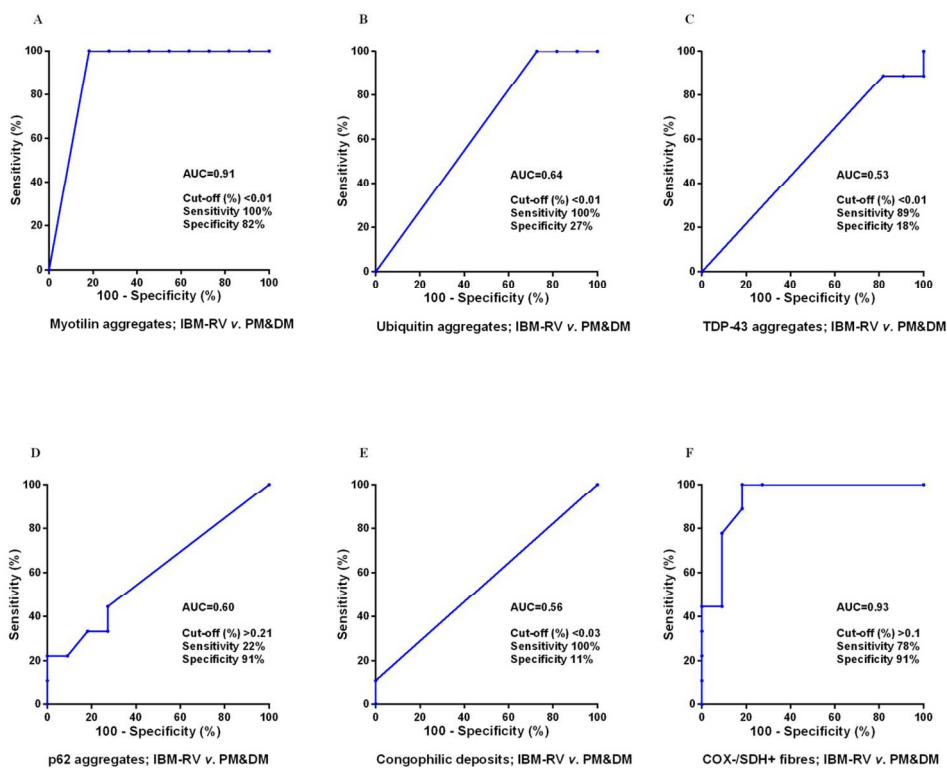

Supplementary Figure 4 Sensitivity and specificity of protein aggregates and mitochondrial changes in IBM-RV compared to PM&DM

Receiver operating characteristic curves for each test showing the area under the curve and optimum cut-off with its sensitivity and specificity for myotilin (A), ubiquitin (B), TDP-43 (C), p62 (D) immunoreactive deposits, congophilic deposits (E) and COX-/SDH+ fibres (F). COX/SDH histochemical staining (F) and myotilin (G) IHC were the most discriminative tests for differentiating IBM-RV and PM&DM. AUC = Area under the curve.

170x139mm (300 x 300 DPI)

**STARD checklist for reporting of studies of diagnostic accuracy**  
(version January 2003)

| Section and Topic           | Item # |                                                                                                                                                                                                 | On page #                                                                                                                                             |
|-----------------------------|--------|-------------------------------------------------------------------------------------------------------------------------------------------------------------------------------------------------|-------------------------------------------------------------------------------------------------------------------------------------------------------|
| TITLE/ABSTRACT/<br>KEYWORDS | 1      | Identify the article as a study of diagnostic accuracy (recommend MeSH heading 'sensitivity and specificity').                                                                                  | Pg 1,2                                                                                                                                                |
| INTRODUCTION                | 2      | State the research questions or study aims, such as estimating diagnostic accuracy or comparing accuracy between tests or across participant groups.                                            | Pg 2-4                                                                                                                                                |
| METHODS                     |        |                                                                                                                                                                                                 |                                                                                                                                                       |
| <i>Participants</i>         | 3      | The study population: The inclusion and exclusion criteria, setting and locations where data were collected.                                                                                    | Pg 4 and<br>Supplementary<br>Tables 1 and 2                                                                                                           |
|                             | 4      | Participant recruitment: Was recruitment based on presenting symptoms, results from previous tests, or the fact that the participants had received the index tests or the reference standard?   | Both. Pg 4 and<br>Supplementary Table<br>2                                                                                                            |
|                             | 5      | Participant sampling: Was the study population a consecutive series of participants defined by the selection criteria in item 3 and 4? If not, specify how participants were further selected.  | Patients identified<br>from clinics and<br>systematic search of<br>pathological<br>databases                                                          |
|                             | 6      | Data collection: Was data collection planned before the index test and reference standard were performed (prospective study) or after (retrospective study)?                                    | Retrospective study                                                                                                                                   |
| <i>Test methods</i>         | 7      | The reference standard and its rationale.                                                                                                                                                       | Clinical features and<br>follow-up                                                                                                                    |
|                             | 8      | Technical specifications of material and methods involved including how and when measurements were taken, and/or cite references for index tests and reference standard.                        | Pg 4-6 and<br>Supplementary Table<br>3                                                                                                                |
|                             | 9      | Definition of and rationale for the units, cut-offs and/or categories of the results of the index tests and the reference standard.                                                             | Pg 6                                                                                                                                                  |
|                             | 10     | The number, training and expertise of the persons executing and reading the index tests and the reference standard.                                                                             | Two qualified<br>medical doctors.<br>Neuropathologist and<br>Neurologist with an<br>interest and<br>significant<br>experience in muscle<br>pathology. |
|                             | 11     | Whether or not the readers of the index tests and reference standard were blind (masked) to the results of the other test and describe any other clinical information available to the readers. | All analyses were<br>blinded and<br>performed in a<br>random order. No<br>clinical information<br>was available at the<br>time of analyses.           |
| <i>Statistical methods</i>  | 12     | Methods for calculating or comparing measures of diagnostic accuracy, and the statistical methods used to quantify uncertainty (e.g. 95% confidence intervals).                                 | Pg 6 includes tests<br>for determining<br>diagnostic accuracy<br>including 2x2 tables<br>and ROC curves.                                              |
|                             | 13     | Methods for calculating test reproducibility, if done.                                                                                                                                          | Bland-Altman plots<br>and Cohen's Kappa<br>statistic used.                                                                                            |
| RESULTS                     |        |                                                                                                                                                                                                 |                                                                                                                                                       |
| <i>Participants</i>         | 14     | When study was performed, including beginning and end dates of recruitment.                                                                                                                     | 2011-2013                                                                                                                                             |
|                             | 15     | Clinical and demographic characteristics of the study population (at least information on age, gender, spectrum of presenting symptoms).                                                        | Included in<br>Supplementary Table<br>1                                                                                                               |

|                     |    |                                                                                                                                                                                                                                                     |                                                                                                                                                                   |
|---------------------|----|-----------------------------------------------------------------------------------------------------------------------------------------------------------------------------------------------------------------------------------------------------|-------------------------------------------------------------------------------------------------------------------------------------------------------------------|
|                     | 16 | The number of participants satisfying the criteria for inclusion who did or did not undergo the index tests and/or the reference standard; describe why participants failed to undergo either test (a flow diagram is strongly recommended).        | Not applicable. Retrospective study.                                                                                                                              |
| <i>Test results</i> | 17 | Time-interval between the index tests and the reference standard, and any treatment administered in between.                                                                                                                                        | Study performed using tissue taken at the time of the reference standard                                                                                          |
|                     | 18 | Distribution of severity of disease (define criteria) in those with the target condition; other diagnoses in participants without the target condition.                                                                                             | Diagnoses of control cases included Supplementary Table 2                                                                                                         |
|                     | 19 | A cross tabulation of the results of the index tests (including indeterminate and missing results) by the results of the reference standard; for continuous results, the distribution of the test results by the results of the reference standard. | Tables 1 and 2                                                                                                                                                    |
|                     | 20 | Any adverse events from performing the index tests or the reference standard.                                                                                                                                                                       | Not applicable.                                                                                                                                                   |
| <i>Estimates</i>    | 21 | Estimates of diagnostic accuracy and measures of statistical uncertainty (e.g. 95% confidence intervals).                                                                                                                                           | Included in Tables 1 and 2 and Supplementary Figures 2 and 3                                                                                                      |
|                     | 22 | How indeterminate results, missing data and outliers of the index tests were handled.                                                                                                                                                               | Only one missing result and this is documented in Table 2. The denominator for calculating the proportion was altered to account for missing case in calculations |
|                     | 23 | Estimates of variability of diagnostic accuracy between subgroups of participants, readers or centers, if done.                                                                                                                                     | Included in statistical analysis Pg 6                                                                                                                             |
|                     | 24 | Estimates of test reproducibility, if done.                                                                                                                                                                                                         | Included in statistical analysis Pg 6                                                                                                                             |
| DISCUSSION          | 25 | Discuss the clinical applicability of the study findings.                                                                                                                                                                                           | Discussed in discussion Pg 12-15                                                                                                                                  |



# BMJ Open

## A retrospective cohort study identifying the principal pathological features useful in the diagnosis of inclusion body myositis

|                                 |                                                                                                                                                                                                                                                                                                                                                                                                                                                                                                                                                                                        |
|---------------------------------|----------------------------------------------------------------------------------------------------------------------------------------------------------------------------------------------------------------------------------------------------------------------------------------------------------------------------------------------------------------------------------------------------------------------------------------------------------------------------------------------------------------------------------------------------------------------------------------|
| Journal:                        | <i>BMJ Open</i>                                                                                                                                                                                                                                                                                                                                                                                                                                                                                                                                                                        |
| Manuscript ID:                  | bmjopen-2013-004552.R2                                                                                                                                                                                                                                                                                                                                                                                                                                                                                                                                                                 |
| Article Type:                   | Research                                                                                                                                                                                                                                                                                                                                                                                                                                                                                                                                                                               |
| Date Submitted by the Author:   | 17-Mar-2014                                                                                                                                                                                                                                                                                                                                                                                                                                                                                                                                                                            |
| Complete List of Authors:       | Brady, Stefen; MRC Centre for Neuromuscular Diseases, Division of Neuropathology<br>Squier, Waney; University of Oxford, John Radcliffe Hospital, Department of Neuropathology<br>Sewry, Caroline<br>Hanna, Mike; MRC Centre for Neuromuscular Diseases, UCL Institute of Neurology and National Hospital for Neurology, Neurosurgery,<br>Hilton-Jones, David; Nuffield Department of Clinical Neurosciences (Clinical Neurology), University of Oxford,<br>Holton, Janice; UCL Institute of Neurology, Department of Molecular Neuroscience and MRC Centre for Neuromuscular Diseases |
| <b>Primary Subject Heading</b>: | Neurology                                                                                                                                                                                                                                                                                                                                                                                                                                                                                                                                                                              |
| Secondary Subject Heading:      | Diagnostics                                                                                                                                                                                                                                                                                                                                                                                                                                                                                                                                                                            |
| Keywords:                       | NEUROLOGY, Adult neurology < NEUROLOGY, Neuromuscular disease < NEUROLOGY, Neuropathology < PATHOLOGY                                                                                                                                                                                                                                                                                                                                                                                                                                                                                  |
|                                 |                                                                                                                                                                                                                                                                                                                                                                                                                                                                                                                                                                                        |

SCHOLARONE™  
Manuscripts

1  
2  
3 **A retrospective cohort study identifying the principal pathological features useful in the**  
4 **diagnosis of inclusion body myositis**  
5  
6  
7

8  
9 Corresponding author:

10  
11 Dr Janice L Holton

12  
13 Department of Molecular Neuroscience, UCL Institute of Neurology, Queen Square, London, UK.

14  
15 janice.holton@ucl.ac.uk; tel: 00 44 (0)20 3448 4239; fax: 00 44 (0)20 3448 4486.  
16  
17

18  
19 Authors:

20  
21 Stefen Brady<sup>1</sup>, Waney Squier<sup>2</sup>, Caroline Sewry<sup>3,4</sup>, Michael Hanna<sup>1</sup>, David Hilton-Jones<sup>5</sup>, Janice L  
22  
23 Holton<sup>6</sup>  
24  
25

26  
27 <sup>1</sup>MRC Centre for Neuromuscular Diseases, UCL Institute of Neurology and National Hospital for  
28  
29 Neurology, Neurosurgery, Queen Square, London, UK.

30  
31 <sup>2</sup>Department of Neuropathology, University of Oxford, John Radcliffe Hospital, Oxford, UK.

32  
33 <sup>3</sup>Dubowitz Neuromuscular Centre, Institute of Child Health and Great Ormond Street Hospital for  
34  
35 Children, London, UK.  
36

37  
38 <sup>4</sup>Wolfson Centre of Inherited Neuromuscular Diseases, RJA Orthopaedic Hospital, Oswestry, UK.

39  
40 <sup>5</sup>Nuffield Department of Clinical Neurosciences (Clinical Neurology), University of Oxford, John  
41  
42 Radcliffe Hospital, Oxford, UK.

43  
44 <sup>6</sup>Department of Molecular Neuroscience, UCL Institute of Neurology, Queen Square, London, UK.  
45  
46  
47  
48

49  
50 Keywords: Neurology, adult neurology, neuromuscular disease, neuropathology

51  
52 Running title: Pathological criteria for inclusion body myositis

53  
54 Word count: 2990  
55  
56  
57  
58  
59  
60

## ABSTRACT

### Objectives

The current pathological diagnostic criteria for sporadic inclusion body myositis (IBM) lack sensitivity. Using immunohistochemical techniques abnormal protein aggregates have been identified in IBM, including some associated with neurodegenerative disorders. Our objective was to investigate the diagnostic utility of a number of markers of protein aggregates together with mitochondrial and inflammatory changes in IBM.

### Design

Retrospective cohort study. The sensitivity of pathological features was evaluated in cases of Griggs' definite IBM. The diagnostic potential of the most reliable features was then assessed in clinically-typical IBM with rimmed vacuoles ( $n=15$ ) and clinically-typical IBM without rimmed vacuoles ( $n=9$ ) and IBM mimics - vacuolar myopathies ( $n=7$ ) and steroid-responsive inflammatory myopathies ( $n=11$ ).

### Setting

Specialist muscle services at the John Radcliffe Hospital, Oxford and the National Hospital for Neurology and Neurosurgery, London.

### Results

Individual pathological features, in isolation, lacked sensitivity and specificity. However, the morphology and distribution of p62 aggregates in IBM were characteristic and in a myopathy with rimmed vacuoles, the combination of characteristic p62 aggregates and increased sarcolemmal and internal MHC Class I expression or endomysial T-cells were diagnostic for IBM with a sensitivity of 93% and specificity of 100%. In an inflammatory myopathy lacking rimmed vacuoles, the presence of mitochondrial changes was 100% sensitive and 73% specific for IBM; characteristic p62 aggregates were specific (91%), but lacked sensitivity (44%).

### Conclusions

We propose an easily applied diagnostic algorithm for the pathological diagnosis of IBM. Additionally our findings support the hypothesis that many of the pathological features considered

1  
2  
3 typical of IBM develop later in the disease, explaining their poor sensitivity at disease presentation  
4  
5 and emphasising the need for revised pathological criteria to supplement the clinical criteria in the  
6  
7 diagnosis of IBM.  
8  
9

## 10 11 **STRENGTHS AND LIMITATIONS**

12  
13 The present study is a multicentre retrospective evaluation of the diagnostic utility of pathological  
14  
15 findings for differentiating IBM from myopathies important in the differential diagnosis – myopathies  
16  
17 containing rimmed vacuoles and steroid-responsive inflammatory myopathies.  
18  
19

20  
21 The main strength of our study was the systematic detailed analysis of well-defined cases. This  
22  
23 enabled us to determine the sensitivity and specificity of individual pathological features and produce  
24  
25 an easily applied pathological diagnostic algorithm for IBM for use in clinical practice.  
26  
27

28  
29 Study limitations include the small number of cases and the retrospective design. Further prospective  
30  
31 studies are now required in larger cohorts of patients.  
32  
33  
34  
35  
36  
37  
38  
39  
40  
41  
42  
43  
44  
45  
46  
47  
48  
49  
50  
51  
52  
53  
54  
55  
56  
57  
58  
59  
60

## INTRODUCTION

Sporadic inclusion body myositis (IBM) is the commonest acquired myopathy in those aged over 50 years.[1] Although classified as an idiopathic inflammatory myopathy, muscle biopsy reveals both degenerative and inflammatory features. The widely used Griggs diagnostic criteria require the presence of several pathological findings,[2] namely rimmed vacuoles, an inflammatory infiltrate with invasion of non-necrotic fibres by mononuclear inflammatory cells (partial invasion), and either amyloid deposits or 15-18 nm tubulofilaments identified by electron microscopy (EM). Although these features in combination are highly specific for IBM, individually they occur in other myopathies, including some important in the differential diagnosis for IBM.[3-7] Moreover, cases of clinically-typical IBM have been reported where the combination of these pathological features is absent causing diagnostic difficulty.[8-11]

Over the last two decades, pathological accumulation of many different proteins has been reported in muscle fibres in IBM.[12] Proteins typically associated with neurodegenerative diseases such as  $\beta$ -amyloid ( $A\beta$ ), hyperphosphorylated tau and ubiquitin and newer neurodegenerative markers such as p62 and transactivation response DNA binding protein-43 (TDP-43) have been identified, as well as proteins associated with myofibrillar myopathies (MFM), including desmin and  $\alpha$ B-crystallin.

However, not all observations have been consistently reproduced.[13,14] Mitochondrial changes have also been proposed for inclusion in IBM diagnostic criteria,[15]. Clear guidelines for the incorporation of immunohistochemical findings and mitochondrial changes into diagnostic criteria for IBM have not been established.[16]

Previously, we have shown that the characteristic pattern of weakness associated with IBM is indicative of the diagnosis, even if Griggs pathological features are absent.[11] However, it is not invariably found at presentation. Here we sought to identify which pathological features, other than the Griggs pathological criteria, add further support to the diagnosis of IBM. We systematically investigated which pathological features are present in Griggs pathologically-definite IBM and then

1  
2  
3 established the diagnostic utility of these features in cases of IBM lacking the Griggs criteria, using  
4 myopathies considered in the differential diagnosis of IBM as controls.  
5  
6  
7

## 8 9 **MATERIALS AND METHODS**

10  
11 The study received ethical approval from the Departments of Research and Development at Oxford  
12 University Hospitals NHS Trust, Oxford and University College London Hospitals NHS Foundation  
13 Trust, London.  
14  
15  
16  
17  
18  
19  
20  
21  
22  
23  
24

### 25 **Cases**

26  
27 All patients were followed by specialist muscle services at the John Radcliffe Hospital, Oxford and  
28 the National Hospital for Neurology and Neurosurgery, London. Biopsies were taken for diagnostic  
29 purposes from the deltoid or quadriceps muscles and prior to any treatment.  
30  
31  
32  
33  
34

35  
36 Methods for demonstrating pathological features in IBM, additional to those defined by the Griggs  
37 criteria, were determined in six Griggs pathologically-definite cases of IBM. Cases with no clinical or  
38 pathological evidence of neuromuscular disease were used as controls. The diagnostic utility of the  
39 pathological features identified was assessed in two groups of clinically-typical IBM; one with  
40 rimmed vacuoles on muscle biopsy (IBM+RV;  $n=15$ ), the other without rimmed vacuoles on muscle  
41 biopsy (IBM-RV;  $n=9$ ). Disease controls were cases of steroid-responsive inflammatory myopathies  
42 [polymyositis and dermatomyositis; (PM&DM);  $n=11$ ] and protein accumulation myopathies with  
43 rimmed vacuoles (PAM;  $n=7$ ). Clinical characteristics and inclusion criteria are summarised in  
44 Supplementary tables 1 and 2. Tissue from brains donated to the Queen Square Brain Bank for  
45 Neurological Disorders was used as positive controls for protein aggregate staining.  
46  
47  
48  
49  
50  
51  
52  
53  
54  
55  
56  
57  
58  
59  
60

### Muscle biopsies

Muscles biopsies were snap frozen at the time of surgery in isopentane cooled liquid nitrogen. Until sectioning all samples were stored at -80°C. Serial tissue sections were cut to a thickness of 8 µm, allowed to air dry and stored at -80°C until staining. Prior to staining, tissue sections were allowed to dry at room temperature. Tissue sections were stained with haematoxylin and eosin (H&E), combined cytochrome oxidase (COX) succinate dehydrogenase (SDH) histochemistry and for amyloid using alkalised Congo red, crystal violet and thioflavin S. Tissue sections for immunohistochemical staining were fixed for 10 minutes, if required, washed for five minutes in running water and incubated in 0.5% hydrogen peroxide to block endogenous peroxidase for 20 minutes. After further washing, tissue sections were incubated in 5% normal goat serum (Vector Laboratories, Burlingame, California) for 30 minutes and then systematically stained for: 1) proteins classically associated with neurodegenerative disease: tau and hyperphosphorylated tau, ubiquitin, A $\beta$  and  $\alpha$ -synuclein; 2) proteins more recently reported in neurodegenerative disease: p62, TDP-43, fused in sarcoma protein (FUS) and valosin containing protein (VCP); 3) nuclear membrane proteins: lamin A/C and emerin; 4) proteins associated with MFM: desmin, myotilin and  $\alpha$ B-crystallin; and 5) inflammatory cells and major histocompatibility complex class I (MHC Class I): CD3+ T-cells, CD4+ T-cells, CD8+ T-cells, B-cells and macrophages. Primary antibody binding was visualised using Dako REAL™ EnVision™ Detection System which contains horse-radish peroxidase (HRP) labelled goat anti-rabbit/mouse secondary and 3,3'-diaminobenzidine (DAB); following incubation with the relevant primary antibody, tissue sections were washed in phosphate buffered saline (PBS), incubated with HRP labelled goat anti-rabbit/mouse secondary for 30 minutes, washed in PBS and incubated in a 1:50 solution of DAB for three to five minutes. Details of commercial antibodies and conditions used are provided in Supplementary Table 3. IHC for each antibody was performed on all cases simultaneously and including positive and negative controls (Supplementary Figure 1).

### Definitions and quantification

The total number of fibres and the number undergoing partial invasion, containing rimmed vacuoles, protein aggregates and COX-negative SDH-positive (COX-/SDH+) fibres were quantified using ImagePro version 6.2 (Media Cybernetics), to ensure that the whole biopsy was systematically analysed. Only transversely-orientated fibres not undergoing necrosis or regeneration were quantified. Tissue sections stained with Congo red were visualised under fluorescent and polarised light. Areas of fluorescence were examined using both rhodamine red (excitation 512-546 nm and emission 600-640 nm) and fluorescein isothiocyanate (excitation 440-480 nm and emission 527-530 nm) filters to exclude auto-fluorescence. Supplementary Table 4 provides definitions of the pathological features assessed. The inflammatory infiltrate and MHC Class I staining were analysed using a modified version of the semi-quantitative juvenile dermatomyositis score-tool (Supplementary Figure 2).[17] Assessments were performed blind to clinical details and diagnosis by a single individual (SB). Ten per cent of slides were re-counted to assess intra-observer reliability and 336 slides were assessed independently by two observers (SB and JLH) to determine inter-observer reliability.

### Statistical analysis

Statistical analyses were performed using GraphPad PRISM version 5. Continuous and categorical variables were compared using Mann Whitney *U*-test and chi-squared or Fisher's exact test respectively. Spearman's rank order correlation was used to determine the strength and direction of associations between pathological findings. Linear regression was used to determine relationships between clinical features and pathological findings. Test characteristics were calculated using receiver operating characteristic (ROC) curves and 2x2 contingency tables. A test was considered diagnostic when sensitivity >75% and specificity >95% or sensitivity >95% and specificity >75%. Intra-observer and inter-observer agreement was calculated using Bland-Altman plots and Cohen's kappa statistic ( $\kappa$ ). Repeat counts were within 95% confidence intervals using Bland-Altman plots and  $\kappa$  was  $\geq 0.7$  indicating good intra-observer and good or excellent inter-observer reliability. Statistical significance was set at  $p < 0.05$ .



## RESULTS

### Pathological findings in Griggs' pathologically-definite IBM

p62, TDP-43, ubiquitin, myotilin and  $\alpha$ B-crystallin immunoreactive aggregates were present in all six IBM cases but not in normal controls (Figures 1A-E). p62 and  $\alpha$ B-crystallin immunoreactive aggregates were present in a greater percentage of fibres than the pathological features required in the Griggs criteria ( $p < 0.05$ ) (Figure 2). Despite their abundance,  $\alpha$ B-crystallin immunoreactive aggregates were difficult to quantify due to a significant variability in their morphology. No immunoreactive deposits were observed in IBM cases or normal controls with antibodies to tau and phosphorylated tau, A $\beta$ ,  $\alpha$ -synuclein, desmin, emerin, lamin A/C, FUS or VCP. Alkalinised Congo red staining was more sensitive than crystal violet and thioflavin S staining for observing amyloid aggregates (Figure 1F). Tissue sections containing congophilic deposits identified under fluorescence light showed no apple-green birefringence under polarised light. Mitochondrial changes and increased sarcolemmal and sarcoplasmic MHC Class I staining were observed in all six IBM cases, but not in normal controls. The inflammatory infiltrate was predominantly composed of endomysial CD8+ T-cells and macrophages, with relatively few B-cells.

### Quantitative analysis of pathological features in IBM and disease controls

Having shown that p62, TDP-43, ubiquitin and myotilin aggregates, congophilic deposits, MHC Class I and inflammatory cells were prevalent in Griggs' pathologically-definite IBM, the presence of these abnormalities, together with mitochondrial changes were assessed in IBM+RV, IBM-RV and disease controls.

The percentage of fibres containing p62, TDP-43, myotilin and ubiquitin aggregates and congophilic deposits were greater in IBM+RV than in IBM-RV; there was no difference in the number of COX-/SDH+ fibres (Figure 3A-F). Protein aggregates were observed in morphologically-normal fibres and in fibres exhibiting Griggs' pathological features. p62 and TDP-43 positive aggregates were present in

1  
2  
3 a greater percentage of fibres in IBM+RV compared to PAM; however, there were no differences in  
4  
5 the percentage of fibres containing myotilin and ubiquitin aggregates or congophilic deposits. The  
6  
7 percentage of fibres containing p62, TDP-43 and ubiquitin aggregates or congophilic deposits were  
8  
9 similar in IBM-RV and PM&DM; however, myotilin aggregates were present in a greater percentage  
10  
11 of fibres in PM&DM and COX-/SDH+ fibres were more abundant in IBM-RV. Analysis of the total  
12  
13 inflammatory infiltrate (the sum of the semi-quantitative scores for T-cells, B-cells and macrophages)  
14  
15 in the endomysium, perimysium and perivascular areas revealed that there were greater numbers of  
16  
17 inflammatory cells in the endomysium and perimysium in IBM+RV than in PAM ( $p<0.03$ ). The same  
18  
19 analysis comparing the sum of the inflammatory cells in IBM-RV and PM&DM revealed that the  
20  
21 distribution and intensity of the inflammatory infiltrate was similar.  
22  
23  
24  
25  
26  
27  
28  
29  
30

### 31 **Diagnostic utility of pathological features in IBM and disease controls**

32  
33 To mimic the diagnostic difficulty encountered in clinical practice, the ability of each test to  
34  
35 differentiate between myopathies containing rimmed vacuoles (IBM+RV and PAM) and between  
36  
37 inflammatory myopathies (IBM-RV and PM&DM) was assessed.  
38  
39  
40  
41  
42

### 43 ***Diagnostic utility determined using receiver-operating characteristic curves***

44  
45 Individually, the presence of p62 immunoreactive inclusions and COX-/SDH+ fibres had the highest  
46  
47 sensitivity and specificity for differentiating IBM+RV from PAM, (Supplementary Figure 3) (Table  
48  
49 1). Differentiating between IBM-RV and PM&DM, myotilin positive inclusions or COX-/SDH+  
50  
51 fibres had the highest sensitivity and specificity for IBM-RV (Supplementary Figure 4) (Table 1).  
52  
53 Only the presence of myotilin positive inclusions satisfied criteria to be considered suitable as a  
54  
55 diagnostic test (<0.01% of fibres containing myotilin aggregates had a sensitivity of 100% and  
56  
57 specificity of 82% for IBM-RV).  
58  
59  
60

**Table 1 Test characteristics**

Table shows the area under the curve and optimum cut-off for each test with the accompanying sensitivity and specificity. AUC = Area under the curve.

| Test feature         | IBM+RV v. PAM |                                   |             |             | IBM-RV v. PM&DM |                                   |             |             |
|----------------------|---------------|-----------------------------------|-------------|-------------|-----------------|-----------------------------------|-------------|-------------|
|                      | AUC           | Cut-off<br>(% of affected fibres) | Sensitivity | Specificity | AUC             | Cut-off<br>(% of affected fibres) | Sensitivity | Specificity |
| Rimmed vacuoles      | 0.60          | >0.28                             | 0.53        | 0.71        | -               | -                                 | -           | -           |
| p62 aggregates       | 0.87          | >0.48                             | 0.87        | 0.86        | 0.60            | >0.21                             | 0.22        | 0.91        |
| TDP-43 aggregates    | 0.80          | >0.34                             | 0.80        | 0.86        | 0.53            | <0.01                             | 0.89        | 0.18        |
| Ubiquitin aggregates | 0.68          | >0.18                             | 0.53        | 0.85        | 0.64            | <0.01                             | 1.00        | 0.27        |
| Myotilin aggregates  | 0.55          | <0.25                             | 1.00        | 0.29        | 0.91            | <0.01                             | 1.00        | 0.82        |
| Congophilic deposits | 0.56          | >0.24                             | 0.73        | 0.71        | 0.56            | <0.03                             | 0.11        | 0.82        |
| COX-/SDH+ fibres     | 0.87          | >0.04                             | 0.86        | 0.86        | 0.93            | >0.1                              | 0.78        | 0.91        |

1  
2  
3 ***Diagnostic utility determined by comparing proportion of affected cases in each diagnostic group***  
4

5 In the aforementioned experiments, the number of fibres within each muscle biopsy was quantified.  
6  
7 However, this is impractical for routine clinical use. Thus, the proportions of affected cases in each  
8  
9 group were compared (Table 2). This revealed that neither staining for protein aggregates nor  
10  
11 congophilic deposits could differentiate between IBM+RV and PAM. The pathological findings in  
12  
13 IBM-RV and PM&DM were also similar, except that the absence of myotilin immunoreactive  
14  
15 aggregates was sensitive and specific for IBM-RV. COX-/SDH+ fibres were also suggestive of IBM-  
16  
17 RV; one or more COX-/SDH+ fibres had a sensitivity of 100% and specificity 73% for IBM-RV.  
18  
19

20  
21 Increased MHC Class I expression lacked specificity. However, strong (diffuse sarcolemmal and  
22  
23 sarcoplasmic) MHC Class I up-regulation was diagnostic for IBM+RV, differentiating it from PAM,  
24  
25 as were the presence of either endomysial CD3+ T-cell or CD4+ T-cell scores >1 or an endomysial  
26  
27 CD8+ T-cell score >0. Partial invasion was specific for IBM+RV, but lacked sensitivity. Although the  
28  
29 sum of the inflammatory infiltrate was similar in IBM-RV and PM&DM, analysis of the  
30  
31 inflammatory cell sub-types revealed greater numbers of perimysial CD3+ T-cells, CD8+ T-cells and  
32  
33 endomysial B-cells [were observed] in PM&DM than in IBM-RV ( $p \leq 0.02$ ), however, this was not  
34  
35 diagnostically useful. There was no difference in the proportion of cases with fibres undergoing  
36  
37 partial invasion between IBM-RV and PM&DM.  
38  
39  
40  
41  
42  
43  
44  
45  
46  
47  
48  
49  
50  
51  
52  
53  
54  
55  
56  
57  
58  
59  
60

**Table 2 Comparison of the proportion of positive cases in each group**

| Pathological features                | IBM+RV   | PAM     | IBM+RV v. PAM |             | IBM-RV  | PM&DM    | IBM-RV v. PM&DM |             | IBM+RV v. IBM-RV |
|--------------------------------------|----------|---------|---------------|-------------|---------|----------|-----------------|-------------|------------------|
|                                      | n (%)    | n (%)   | Sensitivity   | Specificity | n (%)   | n (%)    | Sensitivity     | Specificity | p value          |
| Number of cases                      | 15 (100) | 7 (100) |               |             | 9 (100) | 11 (100) |                 |             |                  |
| Aggregated proteins, n (%)           |          |         |               |             |         |          |                 |             |                  |
| p62                                  | 15 (100) | 6 (86)  | 1.00          | 0.14        | 4 (44)  | 3 (27)‡  | 0.40            | 0.72        | 0.003*           |
| TDP-43                               | 13 (87)  | 5 (71)  | 0.87          | 0.29        | 1 (11)  | 2 (18)‡  | 0.11            | 0.82        | 0.001*           |
| Ubiquitin                            | 11 (73)  | 4 (57)  | 0.73          | 0.43        | 0 (0)   | 3 (27)‡  | 0.00            | 0.73        | 0.001*           |
| Myotilin                             | 10 (67)  | 5 (71)  | 0.67          | 0.29        | 0 (0)   | 9 (82)   | 0.00            | 0.18        | 0.002*           |
| Congophilic deposits                 | 13 (87)  | 7 (100) | 0.87          | 0.00        | 1 (11)  | 0 (0)    | 0.11            | 1.00        | 0.001*           |
| COX-/SDH+ fibres†, n (%)             |          |         |               |             |         |          |                 |             |                  |
| Any                                  | 12 (86)  | 2 (29)  | 0.80          | 0.71        | 9 (100) | 3 (27)   | 1.00            | 0.73        | 0.5              |
| Inflammatory features, n (%)         |          |         |               |             |         |          |                 |             |                  |
| MHC Class I up-regulation            | 15 (100) | 3 (43)  | 1.00          | 0.57        | 9 (100) | 11 (100) | 1.00            | 0.00        | 1.00             |
| Strong MHC Class I up-regulation     | 14 (93)  | 0 (0)   | 0.93          | 1.00        | 9 (100) | 10 (91)  | 1.00            | 0.09        | 0.53             |
| Partial invasion                     | 10 (67)  | 0 (0)   | 0.67          | 1.00        | 3 (33)  | 2 (18)   | 0.33            | 0.82        | 0.11             |
| Endomysial CD3+ T-cell score >1      | 13 (87)  | 0 (0)   | 0.87          | 1.00        | 4 (44)  | 7 (64)   | 0.44            | 0.36        | 0.02*            |
| Endomysial CD4+ T-cell score >1      | 12 (80)  | 0 (0)   | 0.80          | 1.00        | 2 (22)  | 5 (45)   | 0.22            | 0.46        | 0.01*            |
| Endomysial CD8+ T-cell score >0      | 14 (93)  | 0 (0)   | 0.93          | 1.00        | 4 (44)  | 5 (45)   | 0.44            | 0.54        | 0.02*            |
| Endomysial CD68+ macrophage score >1 | 12 (80)  | 0 (0)   | 0.80          | 1.00        | 4 (44)  | 8 (73)   | 0.44            | 0.17        | 0.07             |

†In IBM with rimmed vacuoles  $n=14$ . ‡Pathological features present in DM, but not PM cases. \*Statistically significant results.

1  
2  
3 Because IBM-RV is more pathologically akin to PM than DM, analyses were repeated comparing  
4 IBM-RV and PM cases ( $n=6$ ). No p62, TDP-43 or ubiquitin immunoreactive aggregates were  
5  
6 observed in PM cases and the diagnostic utility of tests for differentiating between IBM-RV and PM  
7  
8 yielded similar results to prior analyses between IBM-RV and PM&DM.  
9  
10

### 11 12 13 ***Diagnostic utility of categorising the pattern of p62 staining*** 14

15 The pattern of p62 staining could be categorised into four distinct groups (Figure 1G-J). Aggregates  
16  
17 observed in IBM were present in vacuolated and non-vacuolated fibres and were strongly stained,  
18  
19 discreet and clearly delineated, round or angular and typically located subsarcolemmal, perinuclear  
20  
21 and peri-vacuolar (pattern I). This pattern was observed in every IBM case with p62 aggregates, one  
22  
23 (9%) case of DM and three (43%) cases of PAM (hereditary IBM, dystrophinopathy and genetically  
24  
25 undefined MFM). Defining the pattern of immunoreactivity increased the discriminative value of p62  
26  
27 IHC for differentiating IBM+RV from PAM; pattern I p62 aggregates compared to any p62  
28  
29 aggregates increased the specificity from 14% to 57%, with no loss of sensitivity. Differentiating  
30  
31 IBM-RV and PM&DM, pattern I p62 aggregates were highly specific (91%), but lacked sensitivity  
32  
33 (44%). Patterns II, III and IV were not observed in any IBM cases. Patterns II and III appeared to be  
34  
35 specific for PAM ( $n=2$ ; 26%), both were cases of myotilinopathy ( $n=2$ ; 67%), and DM ( $n=2$ ; 40%)  
36  
37 respectively. Pattern IV occurred in a genetically undefined case of MFM. No differences were  
38  
39 observed in the morphology of TDP-43, myotilin or ubiquitin aggregates between biopsies.  
40  
41  
42  
43

### 44 **Clinicopathological correlation** 45

46 In IBM+RV, IBM-RV and pathologically-definite IBM, there were no correlations in individual  
47  
48 biopsies between pathological features. No relationships were identified between the pathological  
49  
50 findings and age at symptom onset, age at biopsy, disease duration or serum creatine kinase. The same  
51  
52 results were obtained when the IBM groups were analysed separately and as one.  
53  
54  
55  
56  
57  
58  
59  
60

### Proposed diagnostic algorithm

Based on our pathological findings, we propose a diagnostic algorithm for differentiating IBM from its disease mimics (Figure 4).

The algorithm was tested in a further 23 cases that fulfilled the criteria for IBM+RV ( $n=12$ ) and IBM-RV ( $n=11$ ). The algorithm correctly diagnosed 20 (87%) cases: 12 (100%) cases of IBM+RV and eight (73%) cases of IBM-RV. In IBM-RV, COX-/SDH+ fibres were present in 8 (73%) cases, pattern I p62 aggregates in 8 (73%) cases and both in 6 (55%) cases.

### DISCUSSION

While Griggs' pathological criteria have been accepted as diagnostic of IBM, many patients who, observed over time undoubtedly have IBM, lack one or more of the Griggs pathological features at presentation, even on repeat biopsy.[8,11] Despite IBM being associated with a characteristic pattern of finger flexor and knee extensor weakness, not all patients have this pattern at disease onset, and muscle biopsy remains an important tool in differentiating IBM from its mimics. We sought to determine which additional pathological features support a diagnosis of IBM, demonstrating that characteristic p62 immunoreactive aggregates, strong MHC Class I upregulation, endomysial CD3+ T-cell score  $>1$ , CD8+ T-cell score  $>0$  and COX-/SDH+ fibres are features with sufficient sensitivity and specificity to differentiate IBM from pathologically similar myopathies and we propose an easily applied pathological algorithm for the diagnosis of IBM (Figure 4).

In agreement with previous studies, we observed p62,[18] TDP-43,[19] ubiquitin [13] and  $\alpha$ B-crystallin [20] immunoreactive aggregates and a predominantly endomysial inflammatory infiltrate [3] in Griggs pathologically-definite IBM. Diagnostic pathological studies of IBM have concentrated on differentiating IBM from other inflammatory myopathies and two recent quantitative studies have found that TDP-43 and markers of autophagy such as p62 and LC3 may be of diagnostic use.[21,22] However, in these studies only a fraction of each biopsy was analysed i.e. 200 fibres. We have found

1  
2  
3 this limited quantification does not correlate with the percentage of affected fibres in a biopsy nor  
4 does it reflect the way in which a muscle biopsy is assessed. Additionally, studies have lacked  
5 vacuolar myopathy control cases as it is believed that the inflammatory changes present in IBM  
6 enable it to be easily differentiated from other vacuolar myopathies.[22] However, inflammatory  
7 changes are frequently observed in muscular dystrophies and the degree of inflammatory change  
8 necessary to confidently diagnose IBM is currently unknown.

9  
10  
11  
12  
13  
14  
15  
16  
17 To mimic the typical diagnostic conundrums encountered in clinical practice, we evaluated the ability  
18 of the pathological findings to differentiate IBM+RV from other vacuolar myopathies and IBM-RV  
19 from steroid-responsive inflammatory myopathies. We found that quantitative analysis of protein  
20 aggregates, congophilic deposits and COX-/SDH+ fibres was of limited diagnostic use. Analysing the  
21 biopsies dichotomously and using a semi-quantitative score-tool revealed that increased MHC Class I  
22 labelling was sensitive for IBM making it a good initial screening test, its absence excluding the  
23 diagnosis. In agreement with an earlier study, we found p62 aggregates identified the largest number  
24 of affected fibres in IBM.[23] Additionally, as a novel finding, the morphology and distribution of  
25 p62 aggregates was characteristic in IBM. This characteristic pattern of p62 immunoreactive  
26 aggregates was highly sensitive for IBM+RV (100%); their absence from a biopsy containing rimmed  
27 vacuoles effectively ruling-out a diagnosis of IBM. We confirmed that the most diagnostically useful  
28 pathological findings in IBM+RV were evidence of an immune mediated process; strong MHC Class  
29 I staining, endomysial CD3+ T-cell score >1 or an endomysial CD8+ T-cell score >0 were diagnostic.  
30 Having identified either of these features in a biopsy containing rimmed vacuoles no extra diagnostic  
31 certainty was gained from observing partial invasion, COX-/SDH+ fibres or congophilic deposits.

32  
33  
34  
35  
36  
37  
38  
39  
40  
41  
42  
43  
44  
45  
46  
47  
48  
49  
50 The most discriminative pathological tests for differentiating between IBM-RV and PM&DM were  
51 COX/SDH staining and myotilin IHC. Consistent with a recent study,[9] we found the absence of  
52 mitochondrial changes casts doubt on a diagnosis of IBM. There was no difference in the median age  
53 between IBM-RV and PM&DM cases to account for the difference observed in COX-/SDH+ fibres.



1  
2  
3 The presence of myotilin and ubiquitin immunoreactive aggregates appeared to rule out a diagnosis of  
4 IBM-RV. However, we believe the presence of these features in IBM+RV indicates that they are  
5 unlikely to be diagnostically reliable features for differentiating between IBM-RV and steroid-  
6 responsive inflammatory myopathies. Although no pathological feature was able to differentiate IBM-  
7 RV from steroid responsive inflammatory myopathies with certainty the presence of characteristic  
8 p62 aggregates and the absence of COX-/SDH+ fibres may help in supporting and opposing a  
9 diagnosis of IBM-RV respectively. Pattern I p62 immunoreactive aggregates were only present in  
10 44% of the initial IBM-RV cases tested, but they were not observed in PM cases and were very rare in  
11 DM. Although pattern I p62 aggregates appear to lack sensitivity their specificity was 91% making  
12 their presence highly suggestive of a diagnosis of IBM-RV. However, we identified pattern I p62 in  
13 eight out of 11 (73%) further cases of IBM-RV that were assessed indicating a greater sensitivity and  
14 that p62 IHC warrants further investigation and validation in a larger, independent series. The  
15 diagnostic utility of the other patterns of p62 staining is uncertain. Although pattern II appeared to  
16 have some specificity for myotilinopathy the small number of cases makes it drawing any conclusion  
17 problematic. In addition to p62 other autophagic proteins have been found in IBM and suggested as  
18 diagnostic markers. [22] Autophagy is a cellular mechanism for degrading and recycling cellular  
19 proteins and organelles and therefore, altered autophagy could lead to the accumulation of abnormal  
20 mitochondria and misfolded aggregation-prone proteins and may also result in altered antigen  
21 presentation leading to the widespread increase of MHC Class I and suggests that altered autophagy  
22 may play an important role in the pathogenesis of IBM.

23  
24  
25  
26  
27  
28  
29  
30  
31  
32  
33  
34  
35  
36  
37  
38  
39  
40  
41  
42  
43  
44  
45  
46 Almost all pathological features - protein aggregates, congophilic deposits and inflammation - were  
47 more abundant in IBM+RV than IBM-RV. Despite using slightly different inclusion criteria, similar  
48 differences have been reported between pathologically-typical and pathologically-atypical IBM.[21]  
49 However, we found no differences in the number of COX-/SDH+ fibres, the degree of MHC Class I  
50 upregulation, the morphology and distribution of p62 immunoreactive aggregates or the pattern of the  
51 inflammation between IBM+RV and IBM-RV, supporting our clinical observations that these are the

1  
2  
3 same disease. We believe that the pathological differences between IBM+RV and IBM-RV are, in  
4  
5 part, due to differences in disease duration. Two studies have shown that rimmed vacuoles are more  
6  
7 common in patients who are older at the time of muscle biopsy,[24,11] suggesting that they are  
8  
9 associated with chronologically more advanced disease. Therefore, the pathological findings which  
10  
11 are more abundant in IBM+RV and thought to be typical of IBM may instead be indicative of  
12  
13 chronologically more advanced disease explaining their limited sensitivity at disease presentation.  
14  
15 However, possibly due to the number of cases analysed, we were unable to confirm a relationship  
16  
17 between pathological features and clinical findings. It could be argued that biopsies from different  
18  
19 muscles may have affected the pathological findings observed and differences between IBM groups.  
20  
21 However, in a recent review of 59 muscle biopsies from IBM cases in our clinical archive with  
22  
23 quadriceps (n=31) and deltoid (n=28) biopsies we found no significant difference in the frequency of  
24  
25 pathological findings.  
26  
27

28  
29 A robust clinicopathological definition of IBM is of paramount importance for diagnosis and for  
30  
31 selection and entry of patients into clinical trials. We have shown that certain pathological findings  
32  
33 are more abundant than those included in the current pathologically-focussed diagnostic criteria.  
34  
35 Moreover, p62 immunoreactive deposits, increased MHC Class I expression, endomysial CD3+ T-  
36  
37 cells and CD8+ T-cells and COX-/SDH+ fibres have sufficient sensitivity and specificity to aid in the  
38  
39 histological differentiation of IBM from disease mimics, supporting their inclusion in future  
40  
41 diagnostic criteria for IBM alongside clinical criteria. Both CD3+ T-cells and CD8+ T-cells are  
42  
43 included in the diagnostic algorithm as there was little difference in their sensitivity and specificity for  
44  
45 differentiating IBM+RV from PAM. However, IHC staining for CD3+ T-cells is likely to be more  
46  
47 widely available and avoids the costs of extra staining to subtype the inflammatory infiltrate enabling  
48  
49 diagnostic algorithm to be used by a greater number diagnostic laboratories. Using our diagnostic  
50  
51 algorithm, we found there would be little additional diagnostic security in identifying partial invasion,  
52  
53 performing EM or staining for amyloid deposits. Finally, mitochondrial changes and MHC Class I up-  
54  
55 regulation were the most consistent findings in our IBM cases suggesting that they are central to the  
56  
57

1  
2  
3 pathogenesis and that further investigation and therapeutic intervention should be directed towards  
4  
5 these features.  
6  
7  
8  
9  
10  
11  
12  
13  
14  
15  
16  
17  
18  
19  
20  
21  
22  
23  
24  
25  
26  
27  
28  
29  
30  
31  
32  
33  
34  
35  
36  
37  
38  
39  
40  
41  
42  
43  
44  
45  
46  
47  
48  
49  
50  
51  
52  
53  
54  
55  
56  
57  
58  
59  
60

For peer review only

**ACKNOWLEDGEMENTS**

SB is funded by the Myositis Support Group. JLH is supported by the Reta Lila Weston Institute for Neurological Studies and the Myositis Support Group. This work was undertaken at UCLH/UCL who received a proportion of funding from the Department of Health's NIHR Biomedical Research Centres funding scheme.

**CONTRIBUTORSHIP STATEMENT**

Dr Stefen Brady - Acquisition of data, analysis and interpretation of data and drafting of manuscript.

Dr Waney Squier - Critical revision of manuscript for important intellectual content.

Prof. Caroline Sewry - Study concept and design and critical revision of manuscript for important intellectual content.

Prof. Mike Hanna - Critical revision of manuscript for important intellectual content.

Dr David Hilton-Jones - Critical revision of manuscript for important intellectual content.

Dr Janice Holton - Study concept and design, critical revision of manuscript for important intellectual content and study supervision.

**COMPETING INTERESTS**

None

**DATA SHARING**

All additional data can be found in supplementary tables and figures.

**REFERENCES**

1. Needham M, James I, Corbett A, et al. Sporadic inclusion body myositis: phenotypic variability and influence of HLA-DR3 in a cohort of 57 Australian cases. *J Neurol Neurosurg Psychiatr*. 2008;79:1056–60.
2. Griggs RC, Askanas V, DiMauro S, et al. Inclusion body myositis and myopathies. *Ann Neurol*. 1995;38:705–13.
3. Arahata K, Engel AG. Monoclonal antibody analysis of mononuclear cells in myopathies. I: Quantitation of subsets according to diagnosis and sites of accumulation and demonstration and counts of muscle fibers invaded by T cells. *Ann Neurol*. 1984;16:193–208.
4. Mhiri C, Gherardi R. Inclusion body myositis in French patients. A clinicopathological evaluation. *Neuropathol Appl Neurobiol*. 1990;16:333–44.
5. Villanova M, Kawai M, Lübke U, et al. Rimmed vacuoles of inclusion body myositis and oculopharyngeal muscular dystrophy contain amyloid precursor protein and lysosomal markers. *Brain Res*. 1993;603:343–7.
6. Van der Meulen MF, Hoogendijk JE, Moons KG, et al. Rimmed vacuoles and the added value of SMI-31 staining in diagnosing sporadic inclusion body myositis. *Neuromuscul Disord*. 2001;11:447–51.
7. Ferrer I, Olivé M. Molecular pathology of myofibrillar myopathies. *Expert Rev Mol Med*. 2008;10:e25.
8. Amato AA, Gronseth GS, Jackson CE, et al. Inclusion body myositis: clinical and pathological boundaries. *Ann Neurol*. 1996;40:581–6.
9. Chahin N, Engel AG. Correlation of muscle biopsy, clinical course, and outcome in PM and sporadic IBM. *Neurology*. 2008;70:418–24.
10. Benveniste O, Guiguet M, Freebody J, et al. Long-term observational study of sporadic inclusion body myositis. *Brain*. 2011;134:3176–84.

- 1  
2  
3 11. Brady S, Squier W, Hilton-Jones D. Clinical assessment determines the diagnosis of inclusion  
4 body myositis independently of pathological features. *J Neurol Neurosurg Psychiatr.* 2013; 16.  
5  
6
- 7 12. Greenberg SA. Theories of the Pathogenesis of Inclusion Body Myositis. *Current*  
8  
9 *Rheumatology Reports.* 2010;12:221–8.  
10
- 11 13. Sherriff FE, Joachim CL, Squier MV, et al. Ubiquitinated inclusions in inclusion-body myositis  
12 patients are immunoreactive for cathepsin D but not  $\beta$ -amyloid. *Neuroscience Letters.*  
13  
14 1995;194:37–40.  
15
- 16 14. Greenberg SA. How citation distortions create unfounded authority: analysis of a citation  
17 network. *BMJ.* 2009;339:b2680.  
18
- 19 15. Needham M, and Mastaglia FL. (2007). Inclusion body myositis: current pathogenetic concepts  
20 and diagnostic and therapeutic approaches. *Lancet Neurol.* 6, 620–631.  
21
- 22 16. Benveniste O, Hilton-Jones D. International Workshop on Inclusion Body Myositis held at the  
23 Institute of Myology, Paris, on 29 May 2009. *Neuromuscular Disorders.* 2010;20:414–21.  
24
- 25 17. Wedderburn LR, Varsani H, Li CKC, Newton KR, Amato AA, Banwell B, et al. International  
26 consensus on a proposed score system for muscle biopsy evaluation in patients with juvenile  
27 dermatomyositis: a tool for potential use in clinical trials. *Arthritis Rheum.* 2007;57:1192–201.  
28
- 29 18. Nogalska A, Terracciano C, D'Agostino C, et al. p62/SQSTM1 is overexpressed and  
30 prominently accumulated in inclusions of sporadic inclusion-body myositis muscle fibers, and  
31 can help differentiating it from polymyositis and dermatomyositis. *Acta Neuropathol.*  
32  
33 2009;118:407–413.  
34
- 35 19. Wehl CC, Temiz P, Miller SE, et al. TDP-43 accumulation in inclusion body myopathy muscle  
36 suggests a common pathogenic mechanism with frontotemporal dementia. *J. Neurol.*  
37  
38 *Neurosurg. Psychiatr.* 2008;79:1186–1189.  
39
- 40 20. Banwell BL, Engel AG. Alpha B-crystallin immunolocalization yields new insights into  
41 inclusion body myositis. *Neurology.* 2000;54:1033–1041.  
42
- 43 21. Dubourg O, Wanschitz J, Maisonobe T, et al. Diagnostic value of markers of muscle  
44 degeneration in sporadic inclusion body myositis. *Acta Myol.* 2011. 30, 103–108.  
45  
46  
47  
48  
49  
50  
51  
52  
53  
54  
55  
56  
57  
58  
59  
60

- 1  
2  
3 22. Hiniker A, Daniels BH, Lee HS, et al. Comparative utility of LC3, p62 and TDP-43  
4 immunohistochemistry in differentiation of inclusion body myositis from polymyositis and  
5 related inflammatory myopathies. *Acta Neuropathologica Communications*. 2013. 1:29.  
6  
7  
8  
9 23. D'Agostino C, Nogalska A, Engel WK, et al. In sporadic inclusion-body myositis muscle fibres  
10 TDP-43-positive inclusions are less frequent and robust than p62-inclusions, and are not  
11 associated with paired helical filaments. *Neuropathol Appl Neurobiol*. 2010; Available from:  
12 <http://www.ncbi.nlm.nih.gov/pubmed/20626631>.  
13  
14  
15  
16  
17 24. Momma K, Noguchi S, Malicdan MCV, et al. Rimmed vacuoles in Becker muscular dystrophy  
18 have similar features with inclusion myopathies. *PLoS ONE*. 2012;7:e52002.  
19  
20  
21  
22  
23  
24  
25  
26  
27  
28  
29  
30  
31  
32  
33  
34  
35  
36  
37  
38  
39  
40  
41  
42  
43  
44  
45  
46  
47  
48  
49

50 **Supplementary Figure 1 Control staining in brain and muscle tissue**

51 Positive and negative (no primary) brain control sections and normal muscle stained using  
52 immunohistochemistry for: p62 (A-C), TDP-43 (D-F),  $\alpha$  B-crystallin (G-I), ubiquitin (J-K) and  
53 myotilin (M,N) and alkalised congo red (O).  
54  
55  
56  
57  
58  
59  
60

1  
2  
3 (A-C) Negative (A) and positive (B) control sections of AD brain and normal muscle (C) stained for  
4 p62. Positive control shows p62 positive neurofibrillary tangles and dystrophic neurites (B). No p62  
5 immunoreactivity is observed in normal muscle (C).

6  
7 (D-F) Negative (D) and positive (E) control sections of FTLD-TDP brain and normal muscle (F)  
8 stained for TDP-43. Positive control shows normal nuclear labelling and mislocalised neuronal  
9 cytoplasmic staining with neuropil threads (E). Insert shows a neuron with absent nuclear TDP-43 and  
10 a cytoplasmic TDP-43 inclusion (E, red arrow and x100 insert). Nuclear TDP-43 staining is observed  
11 in normal muscle.

12  
13 (G-I) Negative (G) and positive (H) control sections of CBD brain and normal muscle (I) stained for  $\alpha$   
14 B-crystallin. Positive control shows neuropil threads and a balloon cell neuron (H; red arrow and x100  
15 insert). No  $\alpha$  B-crystallin immunoreactivity is observed in normal muscle (I).

16  
17 (J-L) Negative (J) and positive (K) control AD brain and normal muscle (L) stained for ubiquitin.  
18 Positive control shows dystrophic neurites and neuropil threads (K). No ubiquitin immunoreactivity is  
19 observed in normal muscle (L).

20  
21 (M,N) Negative (M) and positive (N) control muscle stained for myotilin. Mild sarcoplasmic staining  
22 is observed in normal muscle (N).

23  
24 (O) Positive control section of AD brain showing an amyloid plaque (O).

25  
26 Scale bar represents 100  $\mu$ m in A-D, F and H-M; and 50  $\mu$ m in E, N-O.

27  
28 p62 = Sequestosome 1; AD = Alzheimer's disease; TDP-43 = Transactivation response DNA binding  
29 protein 43; FTLD-TDP = Frontotemporal lobar degeneration with TDP-43 positive inclusions; CBD =  
30 Corticobasal degeneration.  
31  
32  
33  
34  
35  
36

### 37 **Supplementary Figure 2 IBM inflammatory score-tool**

38  
39 Score tool modified from the published juvenile dermatomyositis inflammatory (JDM) score tool [17]  
40 to specifically assess the type, degree and distribution of inflammation in IBM. The inflammatory  
41 domain was augmented to include T-cells, T-cell subtypes, B-cells and macrophages. MHC Class I  
42 staining was expanded to include three patterns of labelling. The vascular, muscle fibre and  
43 connective tissue domains which are present in the JDM score tool were not included.  
44  
45  
46  
47  
48  
49  
50

### 51 **Supplementary Figure 3 Sensitivity and specificity of rimmed vacuoles, protein aggregates and** 52 **mitochondrial changes in IBM+RV compared to PAM** 53 54 55 56 57 58 59 60



1  
2  
3 Receiver operating characteristic curves for each test including the area under the curve and optimum  
4 cut-off with its associated sensitivity and specificity for rimmed vacuoles (A), myotilin (B), ubiquitin  
5 (C), TDP-43 (D), p62 (E) immunoreactive deposits, congophilic deposits (F) and COX-/SDH+ fibres  
6 (G). COX/SDH HC staining was the most discriminative test for differentiating IBM+RV and PAM  
7 (G). However, there was little difference between COX/SDH HC staining, TDP-43 and p62 IHC  
8 staining and none were sufficiently discriminative to be considered diagnostic. AUC = Area under the  
9 curve.  
10  
11  
12  
13  
14  
15  
16

17  
18  
19 **Supplementary Figure 4 Sensitivity and specificity of protein aggregates and mitochondrial**  
20 **changes in IBM-RV compared to PM&DM**  
21

22  
23 Receiver operating characteristic curves for each test showing the area under the curve and optimum  
24 cut-off with its sensitivity and specificity for myotilin (A), ubiquitin (B), TDP-43 (C), p62 (D)  
25 immunoreactive deposits, congophilic deposits (E) and COX-/SDH+ fibres (F). COX/SDH  
26 histochemical staining (F) and myotilin (G) IHC were the most discriminative tests for differentiating  
27 IBM-RV and PM&DM. AUC = Area under the curve.  
28  
29  
30  
31  
32  
33  
34

35  
36 **Figure 1 Protein aggregates and congophilic deposits in IBM**  
37

38 Stained cryostat sections, showing fibres, often in clusters, containing protein aggregates stained for  
39 p62 (A), TDP-43 (B), ubiquitin (C),  $\alpha$ B-crystallin (D) and myotilin (E). Protein aggregates were  
40 present throughout fibres, and were observed in apparently normal fibres, vacuolated fibres and fibres  
41 surrounded by inflammatory infiltrates. In fibres containing TDP-43 aggregates, myonuclear TDP-43  
42 staining was frequently reduced (B). Congophilic deposits were observed in vacuolated fibres using  
43 epifluorescence (F). Tissue sections were examined using both the rhodamine red and fluorescein  
44 isothiocyanate filters to exclude areas of auto-fluorescence (arrow). Combined fluorescent image is  
45 shown. Four patterns of immunoreactivity were observed in IBM and disease controls stained for p62  
46 using IHC (G)(H)(I)(J). Pattern I (G) - strongly stained, discreet and clearly delineated, round or  
47 angular aggregates, variable in number and size within a muscle fibre but rarely filling it and  
48  
49  
50  
51  
52  
53  
54  
55  
56  
57

1  
2  
3 predominantly located subsarcolemmal, but also perinuclear and adjacent to vacuoles. Pattern II (H) -  
4 large aggregates of variable staining intensity. Pattern III (I) - fine granular aggregates dispersed  
5 throughout the fibre. Pattern IV (J) - fine granules and wisps of p62 immunoreactivity set within  
6  
7 weakly basophilic inclusions.  
8  
9

10  
11 Scale bar represents 50  $\mu\text{m}$  in A and D; 25  $\mu\text{m}$  in B, C and E-J.  
12  
13  
14  
15  
16  
17  
18

19  
20 **Figure 2 Percentage of muscle fibres containing protein aggregates and Griggs' pathological**  
21 **features**

22  
23 Box and whisker plot illustrating the percentage of muscle fibres containing pathological  
24 abnormalities contained in the Griggs criteria and protein aggregates in Griggs' pathologically-  
25 definite IBM. Fibres containing aggregates immunoreactive for p62 and  $\alpha\text{B}$ -crystallin were more  
26 frequent than those containing the current diagnostic pathological features (red bars) ( $p < 0.05$ ). Protein  
27 aggregates recognised by all antibodies were found in a significantly larger number of fibres than  
28 partial invasion ( $p < 0.02$ ).  
29  
30  
31  
32  
33  
34  
35  
36

37  
38 **Figure 3 Percentage of fibres containing protein aggregates and COX-/SDH+ fibres in each**  
39 **group**

40  
41 Box and whisker plots illustrating the percentage of fibres in each diagnostic category containing p62  
42 (A), TDP-43 (B), myotilin (C) and ubiquitin (D) immunoreactive aggregates, congophilic deposits (E)  
43 and COX-/SDH+ fibres (F). All protein aggregates were present in a greater percentage of fibres in  
44 IBM+RV than in IBM-RV. There was no difference in the percentage of COX-/SDH+ muscle fibres  
45 between these groups. IBM+RV biopsies had a greater percentage of fibres containing p62 (A) and  
46 TDP-43 (B) immunoreactive aggregates and COX-/SDH+ fibres (F) than PAM. Pathological findings  
47 were similar in IBM-RV and PM&DM, with no differences in the percentage of fibres containing p62  
48 (A), TDP-43 (B) and ubiquitin (D) immunoreactive aggregates or congophilic deposits (E). However,  
49  
50  
51  
52  
53  
54  
55  
56  
57  
58  
59  
60

1  
2  
3 there was a greater percentage of COX-/SDH+ fibres (F) in IBM-RV than PM&DM and a greater  
4  
5 percentage of fibres containing myotilin immunoreactive aggregates (C) in PM&DM than IBM-RV.  
6

7 \*Statistically significant results.  
8  
9

#### 10 11 **Figure 4 Proposed diagnostic algorithm for IBM based on pathological findings**

12 Flow diagram showing a proposed pathway for diagnosing IBM based on the pathological findings.

13  
14 Increased MHC Class I staining was observed in all cases of IBM and pattern I p62 aggregates in all  
15  
16 cases of IBM+RV making them good initial screening tests. Their absence rules-out a diagnosis of  
17  
18 IBM and IBM+RV respectively. The presence of endomysial CD3+ T-cell score >1, endomysial  
19  
20 CD8+ T-cell score >0 or strong MHC Class I staining in a biopsy with rimmed vacuoles and p62  
21  
22 aggregates secures a diagnosis of IBM+RV. Differentiating IBM-RV and PM&DM pathologically is  
23  
24 more challenging. The presence of COX-/SDH+ fibres is not specific to IBM-RV; although COX-  
25  
26 /SDH+ fibres were not present in every case of IBM-RV their absence casts doubt on the diagnosis of  
27  
28 IBM-RV. Pattern I p62 aggregates may enable IBM to be differentiated from PM when present.  
29  
30 However, they may lack sensitivity for IBM-RV, therefore their absence does not rule out the  
31  
32 diagnosis.  
33  
34  
35  
36  
37  
38  
39  
40  
41  
42  
43  
44  
45  
46  
47  
48  
49  
50  
51  
52  
53  
54  
55  
56  
57  
58  
59  
60

1  
2  
3 **A retrospective cohort study identifying the principal pathological features useful in the**  
4 **diagnosis of inclusion body myositis**  
5  
6  
7  
8

9 Corresponding author:

10 Dr Janice L Holton

11 Department of Molecular Neuroscience, UCL Institute of Neurology, Queen Square, London, UK.

12 janice.holton@ucl.ac.uk; tel: 00 44 (0)20 3448 4239; fax: 00 44 (0)20 3448 4486.  
13  
14  
15  
16  
17

18  
19 Authors:

20 Stefen Brady<sup>1</sup>, Waney Squier<sup>2</sup>, Caroline Sewry<sup>3,4</sup>, Michael Hanna<sup>1</sup>, David Hilton-Jones<sup>5</sup>, Janice L  
21 Holton<sup>6</sup>  
22  
23  
24  
25  
26

27 <sup>1</sup>MRC Centre for Neuromuscular Diseases, UCL Institute of Neurology and National Hospital for  
28 Neurology, Neurosurgery, Queen Square, London, UK.

29 <sup>2</sup>Department of Neuropathology, University of Oxford, John Radcliffe Hospital, Oxford, UK.

30 <sup>3</sup>Dubowitz Neuromuscular Centre, Institute of Child Health and Great Ormond Street Hospital for  
31 Children, London, UK.  
32  
33

34 <sup>4</sup>Wolfson Centre of Inherited Neuromuscular Diseases, RJA Orthopaedic Hospital, Oswestry, UK.

35 <sup>5</sup>Nuffield Department of Clinical Neurosciences (Clinical Neurology), University of Oxford, John  
36 Radcliffe Hospital, Oxford, UK.  
37  
38

39 <sup>6</sup>Department of Molecular Neuroscience, UCL Institute of Neurology, Queen Square, London, UK.  
40  
41  
42  
43  
44  
45  
46  
47  
48  
49

50 Keywords: Neurology, adult neurology, neuromuscular disease, neuropathology

51 Running title: Pathological criteria for inclusion body myositis

52 Word count: 2990  
53  
54  
55  
56  
57  
58  
59  
60

## ABSTRACT

### Objectives

The current pathological diagnostic criteria for sporadic inclusion body myositis (IBM) lack sensitivity. Using immunohistochemical techniques abnormal protein aggregates have been identified in IBM, including some associated with neurodegenerative disorders. Our objective was to investigate the diagnostic utility of a number of markers of protein aggregates together with mitochondrial and inflammatory changes in IBM.

### Design

Retrospective cohort study. The sensitivity of pathological features was evaluated in cases of Griggs' definite IBM. The diagnostic potential of the most reliable features was then assessed in clinically-typical IBM with rimmed vacuoles ( $n=15$ ) and clinically-typical IBM without rimmed vacuoles ( $n=9$ ) and IBM mimics - vacuolar myopathies ( $n=7$ ) and steroid-responsive inflammatory myopathies ( $n=11$ ).

### Setting

Specialist muscle services at the John Radcliffe Hospital, Oxford and the National Hospital for Neurology and Neurosurgery, London.

### Results

Individual pathological features, in isolation, lacked sensitivity and specificity. However, the morphology and distribution of p62 aggregates in IBM were characteristic and in a myopathy with rimmed vacuoles, the combination of characteristic p62 aggregates and increased sarcolemmal and internal MHC Class I expression or endomysial T-cells were diagnostic for IBM with a sensitivity of 93% and specificity of 100%. In an inflammatory myopathy lacking rimmed vacuoles, the presence of mitochondrial changes was 100% sensitive and 73% specific for IBM; characteristic p62 aggregates were specific (91%), but lacked sensitivity (44%).

### Conclusions

We propose an easily applied diagnostic algorithm for the pathological diagnosis of IBM. Additionally our findings support the hypothesis that many of the pathological features considered

1  
2  
3 typical of IBM develop later in the disease, explaining their poor sensitivity at disease presentation  
4  
5 and emphasising the need for revised pathological criteria to supplement the clinical criteria in the  
6  
7 diagnosis of IBM.  
8  
9

## 10 11 **STRENGTHS AND LIMITATIONS**

12  
13 The present study is a multicentre retrospective evaluation of the diagnostic utility of pathological  
14  
15 findings for differentiating IBM from myopathies important in the differential diagnosis – myopathies  
16  
17 containing rimmed vacuoles and steroid-responsive inflammatory myopathies.  
18  
19

20  
21 The main strength of our study was the systematic detailed analysis of well-defined cases. This  
22  
23 enabled us to determine the sensitivity and specificity of individual pathological features and produce  
24  
25 an easily applied pathological diagnostic algorithm for IBM for use in clinical practice.  
26  
27

28  
29 Study limitations include the small number of cases and the retrospective design. Further prospective  
30  
31 studies are now required in larger cohorts of patients.  
32  
33

## 34 35 **INTRODUCTION**

36  
37 Sporadic inclusion body myositis (IBM) is the commonest acquired myopathy in those aged over 50  
38  
39 years.[1] Although classified as an idiopathic inflammatory myopathy, muscle biopsy reveals both  
40  
41 degenerative and inflammatory features. The widely used Griggs diagnostic criteria require the  
42  
43 presence of several pathological findings,[2] namely rimmed vacuoles, an inflammatory infiltrate with  
44  
45 invasion of non-necrotic fibres by mononuclear inflammatory cells (partial invasion), and either  
46  
47 amyloid deposits or 15-18 nm tubulofilaments identified by electron microscopy (EM). Although  
48  
49 these features in combination are highly specific for IBM, individually they occur in other  
50  
51 myopathies, including some important in the differential diagnosis for IBM.[3-7] Moreover, cases of  
52  
53 clinically-typical IBM have been reported where the combination of these pathological features is  
54  
55 absent causing diagnostic difficulty.[8-11]  
56  
57

1  
2  
3  
4  
5 Over the last two decades, pathological accumulation of many different proteins has been reported in  
6  
7 muscle fibres in IBM.[12] Proteins typically associated with neurodegenerative diseases such as  $\beta$ -  
8  
9 amyloid ( $A\beta$ ), hyperphosphorylated tau and ubiquitin and newer neurodegenerative markers such as  
10  
11 p62 and transactivation response DNA binding protein-43 (TDP-43) have been identified, as well as  
12  
13 proteins associated with myofibrillar myopathies (MFM), including desmin and  $\alpha B$ -crystallin.  
14  
15 However, not all observations have been consistently reproduced.[13,14] Mitochondrial changes have  
16  
17 also been proposed for inclusion in IBM diagnostic criteria,[15]. Clear guidelines for the  
18  
19 incorporation of immunohistochemical findings and mitochondrial changes into diagnostic criteria for  
20  
21 IBM have not been established.[16]  
22  
23  
24

25 Previously, we have shown that the characteristic pattern of weakness associated with IBM is  
26  
27 indicative of the diagnosis, even if Griggs pathological features are absent.[11] However, it is not  
28  
29 invariably found at presentation. Here we sought to identify which pathological features, other than  
30  
31 the Griggs pathological criteria, add further support to the diagnosis of IBM. We systematically  
32  
33 investigated which pathological features are present in Griggs pathologically-definite IBM and then  
34  
35 established the diagnostic utility of these features in cases of IBM lacking the Griggs criteria, using  
36  
37 myopathies considered in the differential diagnosis of IBM as controls.  
38  
39  
40

## 41 MATERIALS AND METHODS

42  
43 The study received ethical approval from the Departments of Research and Development at Oxford  
44  
45 University Hospitals NHS Trust, Oxford and University College London Hospitals NHS Foundation  
46  
47 Trust, London.  
48  
49  
50  
51  
52  
53  
54  
55  
56  
57  
58  
59  
60

## Cases

All patients were followed by specialist muscle services at the John Radcliffe Hospital, Oxford and the National Hospital for Neurology and Neurosurgery, London. Biopsies were taken for diagnostic purposes from the deltoid or quadriceps muscles and prior to any treatment.

Methods for demonstrating pathological features in IBM, additional to those defined by the Griggs criteria, were determined in six Griggs pathologically-definite cases of IBM. Cases with no clinical or pathological evidence of neuromuscular disease were used as controls. The diagnostic utility of the pathological features identified was assessed in two groups of clinically-typical IBM; one with rimmed vacuoles on muscle biopsy (IBM+RV;  $n=15$ ), the other without rimmed vacuoles on muscle biopsy (IBM-RV;  $n=9$ ). Disease controls were cases of steroid-responsive inflammatory myopathies [polymyositis and dermatomyositis; (PM&DM);  $n=11$ ] and protein accumulation myopathies with rimmed vacuoles (PAM;  $n=7$ ). Clinical characteristics and inclusion criteria are summarised in Supplementary tables 1 and 2. Tissue from brains donated to the Queen Square Brain Bank for Neurological Disorders was used as positive controls for protein aggregate staining.

## Muscle biopsies

Muscles biopsies were snap frozen at the time of surgery in isopentane cooled liquid nitrogen. Until sectioning all samples were stored at  $-80^{\circ}\text{C}$ . Serial tissue sections were cut to a thickness of  $8\ \mu\text{m}$ , allowed to air dry and stored at  $-80^{\circ}\text{C}$  until staining. Prior to staining, tissue sections were allowed to dry at room temperature. Tissue sections were stained with haematoxylin and eosin (H&E), combined cytochrome oxidase (COX) succinate dehydrogenase (SDH) histochemistry and for amyloid using alkalised Congo red, crystal violet and thioflavin S. Tissue sections for immunohistochemical staining were fixed for 10 minutes, if required, washed for five minutes in running water and incubated in 0.5% hydrogen peroxide to block endogenous peroxidase for 20 minutes. After further washing, tissue sections were incubated in 5% normal goat serum (Vector Laboratories, Burlingame, California) for 30 minutes and then systematically stained for: 1) proteins classically associated with



1  
2  
3 neurodegenerative disease: tau and hyperphosphorylated tau, ubiquitin, A $\beta$  and  $\alpha$ -synuclein; 2)  
4  
5 proteins more recently reported in neurodegenerative disease: p62, TDP-43, fused in sarcoma protein  
6  
7 (FUS) and valosin containing protein (VCP); 3) nuclear membrane proteins: lamin A/C and emerin;  
8  
9 4) proteins associated with MFM: desmin, myotilin and  $\alpha$ B-crystallin; and 5) inflammatory cells and  
10  
11 major histocompatibility complex class I (MHC Class I): CD3+ T-cells, CD4+ T-cells, CD8+ T-cells,  
12  
13 B-cells and macrophages. Primary antibody binding was visualised using Dako REAL™ EnVision™  
14  
15 Detection System which contains horse-radish peroxidase (HRP) labelled goat anti-rabbit/mouse  
16  
17 secondary and 3,3'-diaminobenzidine (DAB); following incubation with the relevant primary  
18  
19 antibody, tissue sections were washed in phosphate buffered saline (PBS), incubated with HRP  
20  
21 labelled goat anti-rabbit/mouse secondary for 30 minutes, washed in PBS and incubated in a 1:50  
22  
23 solution of DAB for three to five minutes. Details of commercial antibodies and conditions used are  
24  
25 provided in Supplementary Table 3. IHC for each antibody was performed on all cases simultaneously  
26  
27 and including positive and negative controls (Supplementary Figure 1).

### 31 Definitions and quantification

32  
33 The total number of fibres and the number undergoing partial invasion, containing rimmed vacuoles,  
34  
35 protein aggregates and COX-negative SDH-positive (COX-/SDH+) fibres were quantified using  
36  
37 ImagePro version 6.2 (Media Cybernetics), to ensure that the whole biopsy was systematically  
38  
39 analysed. Only transversely-orientated fibres not undergoing necrosis or regeneration were quantified.  
40  
41 Tissue sections stained with Congo red were visualised under fluorescent and polarised light. Areas of  
42  
43 fluorescence were examined using both rhodamine red (excitation 512-546 nm and emission 600-640  
44  
45 nm) and fluorescein isothiocyanate (excitation 440-480 nm and emission 527-530 nm) filters to  
46  
47 exclude auto-fluorescence. Supplementary Table 4 provides definitions of the pathological features  
48  
49 assessed. The inflammatory infiltrate and MHC Class I staining were analysed using a modified  
50  
51 version of the semi-quantitative juvenile dermatomyositis score-tool (Supplementary Figure 2).[17]  
52  
53 Assessments were performed blind to clinical details and diagnosis by a single individual (SB). Ten  
54  
55  
56  
57  
58  
59  
60

1  
2  
3 per cent of slides were re-counted to assess intra-observer reliability and 336 slides were assessed  
4  
5 independently by two observers (SB and JLH) to determine inter-observer reliability.  
6  
7

### 8 9 **Statistical analysis**

10  
11 Statistical analyses were performed using GraphPad PRISM version 5. Continuous and categorical  
12  
13 variables were compared using Mann Whitney *U*-test and chi-squared or Fisher's exact test  
14  
15 respectively. Spearman's rank order correlation was used to determine the strength and direction of  
16  
17 associations between pathological findings. Linear regression was used to determine relationships  
18  
19 between clinical features and pathological findings. Test characteristics were calculated using receiver  
20  
21 operating characteristic (ROC) curves and 2x2 contingency tables. A test was considered diagnostic  
22  
23 when sensitivity >75% and specificity >95% or sensitivity >95% and specificity >75%. Intra-observer  
24  
25 and inter-observer agreement was calculated using Bland-Altman plots and Cohen's kappa statistic  
26  
27 ( $\kappa$ ). Repeat counts were within 95% confidence intervals using Bland-Altman plots and  $\kappa$  was  $\geq 0.7$   
28  
29 indicating good intra-observer and good or excellent inter-observer reliability. Statistical significance  
30  
31 was set at  $p < 0.05$ .  
32  
33  
34

## 35 **RESULTS**

### 36 37 **Pathological findings in Griggs' pathologically-definite IBM**

38  
39 p62, TDP-43, ubiquitin, myotilin and  $\alpha$ B-crystallin immunoreactive aggregates were present in all six  
40  
41 IBM cases but not in normal controls (Figures 1A-E). p62 and  $\alpha$ B-crystallin immunoreactive  
42  
43 aggregates were present in a greater percentage of fibres than the pathological features required in the  
44  
45 Griggs criteria ( $p < 0.05$ ) (Figure 2). Despite their abundance,  $\alpha$ B-crystallin immunoreactive aggregates  
46  
47 were difficult to quantify due to a significant variability in their morphology. No immunoreactive  
48  
49 deposits were observed in IBM cases or normal controls with antibodies to tau and phosphorylated  
50  
51 tau, A $\beta$ ,  $\alpha$ -synuclein, desmin, emerin, lamin A/C, FUS or VCP. Alkalinised Congo red staining was  
52  
53 more sensitive than crystal violet and thioflavin S staining for observing amyloid aggregates (Figure  
54  
55 1F). Tissue sections containing congophilic deposits identified under fluorescence light showed no  
56  
57  
58  
59  
60

1  
2  
3 apple-green birefringence under polarised light. Mitochondrial changes and increased sarcolemmal  
4 and sarcoplasmic MHC Class I staining were observed in all six IBM cases, but not in normal  
5 controls. The inflammatory infiltrate was predominantly composed of endomysial CD8+ T-cells and  
6  
7 macrophages, with relatively few B-cells.  
8  
9

### 10 11 12 13 **Quantitative analysis of pathological features in IBM and disease controls**

14  
15 Having shown that p62, TDP-43, ubiquitin and myotilin aggregates, congophilic deposits, MHC Class  
16 I and inflammatory cells were prevalent in Griggs' pathologically-definite IBM, the presence of these  
17 abnormalities, together with mitochondrial changes were assessed in IBM+RV, IBM-RV and disease  
18 controls.  
19  
20  
21  
22

23  
24  
25 The percentage of fibres containing p62, TDP-43, myotilin and ubiquitin aggregates and congophilic  
26 deposits were greater in IBM+RV than in IBM-RV; there was no difference in the number of COX-  
27 /SDH+ fibres (Figure 3A-F). Protein aggregates were observed in morphologically-normal fibres and  
28 in fibres exhibiting Griggs' pathological features. p62 and TDP-43 positive aggregates were present in  
29 a greater percentage of fibres in IBM+RV compared to PAM; however, there were no differences in  
30 the percentage of fibres containing myotilin and ubiquitin aggregates or congophilic deposits. The  
31 percentage of fibres containing p62, TDP-43 and ubiquitin aggregates or congophilic deposits were  
32 similar in IBM-RV and PM&DM; however, myotilin aggregates were present in a greater percentage  
33 of fibres in PM&DM and COX-/SDH+ fibres were more abundant in IBM-RV. Analysis of the total  
34 inflammatory infiltrate (the sum of the semi-quantitative scores for T-cells, B-cells and macrophages)  
35 in the endomysium, perimysium and perivascular areas revealed that there were greater numbers of  
36 inflammatory cells in the endomysium and perimysium in IBM+RV than in PAM ( $p<0.03$ ). The same  
37 analysis comparing the sum of the inflammatory cells in IBM-RV and PM&DM revealed that the  
38 distribution and intensity of the inflammatory infiltrate was similar.  
39  
40  
41  
42  
43  
44  
45  
46  
47  
48  
49  
50  
51  
52  
53  
54  
55  
56  
57  
58  
59  
60

### Diagnostic utility of pathological features in IBM and disease controls

To mimic the diagnostic difficulty encountered in clinical practice, the ability of each test to differentiate between myopathies containing rimmed vacuoles (IBM+RV and PAM) and between inflammatory myopathies (IBM–RV and PM&DM) was assessed.

#### *Diagnostic utility determined using receiver-operating characteristic curves*

Individually, the presence of p62 immunoreactive inclusions and COX-/SDH+ fibres had the highest sensitivity and specificity for differentiating IBM+RV from PAM, (Supplementary Figure 3) (Table 1). Differentiating between IBM–RV and PM&DM, myotilin positive inclusions or COX-/SDH+ fibres had the highest sensitivity and specificity for IBM-RV (Supplementary Figure 4) (Table 1). Only the presence of myotilin positive inclusions satisfied criteria to be considered suitable as a diagnostic test (<0.01% of fibres containing myotilin aggregates had a sensitivity of 100% and specificity of 82% for IBM-RV).

**Table 1 Test characteristics**

| Test feature         | IBM+RV v. PAM |                                   |             |             | IBM-RV v. PM&DM |                                   |             |             |
|----------------------|---------------|-----------------------------------|-------------|-------------|-----------------|-----------------------------------|-------------|-------------|
|                      | AUC           | Cut-off<br>(% of affected fibres) | Sensitivity | Specificity | AUC             | Cut-off<br>(% of affected fibres) | Sensitivity | Specificity |
| Rimmed vacuoles      | 0.60          | >0.28                             | 0.53        | 0.71        | -               | -                                 | -           | -           |
| p62 aggregates       | 0.87          | >0.48                             | 0.87        | 0.86        | 0.60            | >0.21                             | 0.22        | 0.91        |
| TDP-43 aggregates    | 0.80          | >0.34                             | 0.80        | 0.86        | 0.53            | <0.01                             | 0.89        | 0.18        |
| Ubiquitin aggregates | 0.68          | >0.18                             | 0.53        | 0.85        | 0.64            | <0.01                             | 1.00        | 0.27        |
| Myotilin aggregates  | 0.55          | <0.25                             | 1.00        | 0.29        | 0.91            | <0.01                             | 1.00        | 0.82        |
| Congophilic deposits | 0.56          | >0.24                             | 0.73        | 0.71        | 0.56            | <0.03                             | 0.11        | 0.82        |
| COX-/SDH+ fibres     | 0.87          | >0.04                             | 0.86        | 0.86        | 0.93            | >0.1                              | 0.78        | 0.91        |

Table shows the area under the curve and optimum cut-off for each test with the accompanying sensitivity and specificity. AUC = Area under the curve.

1  
2  
3 ***Diagnostic utility determined by comparing proportion of affected cases in each diagnostic group***  
4

5 In the aforementioned experiments, the number of fibres within each muscle biopsy was quantified.  
6  
7 However, this is impractical for routine clinical use. Thus, the proportions of affected cases in each  
8  
9 group were compared (Table 2). This revealed that neither staining for protein aggregates nor  
10  
11 congophilic deposits could differentiate between IBM+RV and PAM. The pathological findings in  
12  
13 IBM-RV and PM&DM were also similar, except that the absence of myotilin immunoreactive  
14  
15 aggregates was sensitive and specific for IBM-RV. COX-/SDH+ fibres were also suggestive of IBM-  
16  
17 RV; one or more COX-/SDH+ fibres had a sensitivity of 100% and specificity 73% for IBM-RV.  
18

19  
20  
21 Increased MHC Class I expression lacked specificity. However, strong (diffuse sarcolemmal and  
22  
23 sarcoplasmic) MHC Class I up-regulation was diagnostic for IBM+RV, differentiating it from PAM,  
24  
25 as were the presence of either endomysial CD3+ T-cell or CD4+ T-cell scores >1 or an endomysial  
26  
27 CD8+ T-cell score >0. Partial invasion was specific for IBM+RV, but lacked sensitivity. **Although the**  
28  
29 **sum of the inflammatory infiltrate was similar in IBM-RV and PM&DM, analysis of the**  
30  
31 **inflammatory cell sub-types revealed** greater numbers of perimysial CD3+ T-cells, CD8+ T-cells and  
32  
33 endomysial B-cells [were observed] in PM&DM than in IBM-RV ( $p \leq 0.02$ ), however, this was not  
34  
35 diagnostically useful. There was no difference in the proportion of cases with fibres undergoing  
36  
37 partial invasion between IBM-RV and PM&DM.  
38  
39  
40  
41  
42  
43  
44  
45  
46  
47  
48  
49  
50  
51  
52  
53  
54  
55  
56  
57  
58  
59  
60

**Table 2 Comparison of the proportion of positive cases in each group**

| Pathological features                | IBM+RV   | PAM     | IBM+RV v. PAM |             | IBM-RV  | PM&DM    | IBM-RV v. PM&DM |             | IBM+RV v. IBM-RV |
|--------------------------------------|----------|---------|---------------|-------------|---------|----------|-----------------|-------------|------------------|
|                                      | n (%)    | n (%)   | Sensitivity   | Specificity | n (%)   | n (%)    | Sensitivity     | Specificity | p value          |
| Number of cases                      | 15 (100) | 7 (100) |               |             | 9 (100) | 11 (100) |                 |             |                  |
| Aggregated proteins, n (%)           |          |         |               |             |         |          |                 |             |                  |
| p62                                  | 15 (100) | 6 (86)  | 1.00          | 0.14        | 4 (44)  | 3 (27)‡  | 0.40            | 0.72        | 0.003*           |
| TDP-43                               | 13 (87)  | 5 (71)  | 0.87          | 0.29        | 1 (11)  | 2 (18)‡  | 0.11            | 0.82        | 0.001*           |
| Ubiquitin                            | 11 (73)  | 4 (57)  | 0.73          | 0.43        | 0 (0)   | 3 (27)‡  | 0.00            | 0.73        | 0.001*           |
| Myotilin                             | 10 (67)  | 5 (71)  | 0.67          | 0.29        | 0 (0)   | 9 (82)   | 0.00            | 0.18        | 0.002*           |
| Congophilic deposits                 | 13 (87)  | 7 (100) | 0.87          | 0.00        | 1 (11)  | 0 (0)    | 0.11            | 1.00        | 0.001*           |
| COX-/SDH+ fibres†, n (%)             |          |         |               |             |         |          |                 |             |                  |
| Any                                  | 12 (86)  | 2 (29)  | 0.80          | 0.71        | 9 (100) | 3 (27)   | 1.00            | 0.73        | 0.5              |
| Inflammatory features, n (%)         |          |         |               |             |         |          |                 |             |                  |
| MHC Class I up-regulation            | 15 (100) | 3 (43)  | 1.00          | 0.57        | 9 (100) | 11 (100) | 1.00            | 0.00        | 1.00             |
| Strong MHC Class I up-regulation     | 14 (93)  | 0 (0)   | 0.93          | 1.00        | 9 (100) | 10 (91)  | 1.00            | 0.09        | 0.53             |
| Partial invasion                     | 10 (67)  | 0 (0)   | 0.67          | 1.00        | 3 (33)  | 2 (18)   | 0.33            | 0.82        | 0.11             |
| Endomysial CD3+ T-cell score >1      | 13 (87)  | 0 (0)   | 0.87          | 1.00        | 4 (44)  | 7 (64)   | 0.44            | 0.36        | 0.02*            |
| Endomysial CD4+ T-cell score >1      | 12 (80)  | 0 (0)   | 0.80          | 1.00        | 2 (22)  | 5 (45)   | 0.22            | 0.46        | 0.01*            |
| Endomysial CD8+ T-cell score >0      | 14 (93)  | 0 (0)   | 0.93          | 1.00        | 4 (44)  | 5 (45)   | 0.44            | 0.54        | 0.02*            |
| Endomysial CD68+ macrophage score >1 | 12 (80)  | 0 (0)   | 0.80          | 1.00        | 4 (44)  | 8 (73)   | 0.44            | 0.17        | 0.07             |

†In IBM with rimmed vacuoles n=14. ‡Pathological features present in DM, but not PM cases. \*Statistically significant results.

1  
2  
3 Because IBM-RV is more pathologically akin to PM than DM, analyses were repeated comparing  
4 IBM-RV and PM cases ( $n=6$ ). No p62, TDP-43 or ubiquitin immunoreactive aggregates were  
5  
6 observed in PM cases and the diagnostic utility of tests for differentiating between IBM-RV and PM  
7  
8 yielded similar results to prior analyses between IBM-RV and PM&DM.  
9  
10

### 11 12 13 ***Diagnostic utility of categorising the pattern of p62 staining***

14  
15 The pattern of p62 staining could be categorised into four distinct groups (Figure 1G-J). Aggregates  
16  
17 observed in IBM were present in vacuolated and non-vacuolated fibres and were strongly stained,  
18  
19 discreet and clearly delineated, round or angular and typically located subsarcolemmal, perinuclear  
20  
21 and peri-vacuolar (pattern I). This pattern was observed in every IBM case with p62 aggregates, one  
22  
23 (9%) case of DM and three (43%) cases of PAM (hereditary IBM, dystrophinopathy and genetically  
24  
25 undefined MFM). **Defining the pattern of immunoreactivity increased the discriminative value of p62**  
26  
27 **IHC for differentiating IBM+RV from PAM; pattern I p62 aggregates compared to any p62**  
28  
29 **aggregates increased the specificity from 14% to 57%, with no loss of sensitivity. Differentiating**  
30  
31 **IBM-RV and PM&DM, pattern I p62 aggregates were highly specific (91%), but lacked sensitivity**  
32  
33 **(44%). Patterns II, III and IV were not observed in any IBM cases.** Patterns II and III appeared to be  
34  
35 specific for PAM ( $n=2$ ; 26%), both were cases of myotilinopathy ( $n=2$ ; 67%), and DM ( $n=2$ ; 40%)  
36  
37 respectively. Pattern IV occurred in a genetically undefined case of MFM. No differences were  
38  
39 observed in the morphology of TDP-43, myotilin or ubiquitin aggregates between biopsies.  
40  
41  
42  
43

### 44 **Clinicopathological correlation**

45  
46 In IBM+RV, IBM-RV and pathologically-definite IBM, there were no correlations in individual  
47  
48 biopsies between pathological features. No relationships were identified between the pathological  
49  
50 findings and age at symptom onset, age at biopsy, disease duration or serum creatine kinase. The same  
51  
52 results were obtained when the IBM groups were analysed separately and as one.  
53  
54  
55  
56  
57  
58  
59  
60

### Proposed diagnostic algorithm

Based on our pathological findings, we propose a diagnostic algorithm for differentiating IBM from its disease mimics (Figure 4).

The algorithm was tested in a further 23 cases that fulfilled the criteria for IBM+RV ( $n=12$ ) and IBM-RV ( $n=11$ ). The algorithm correctly diagnosed 20 (87%) cases: 12 (100%) cases of IBM+RV and eight (73%) cases of IBM-RV. In IBM-RV, COX-/SDH+ fibres were present in 8 (73%) cases, pattern I p62 aggregates in 8 (73%) cases and both in 6 (55%) cases.

### DISCUSSION

While Griggs' pathological criteria have been accepted as diagnostic of IBM, many patients who, observed over time undoubtedly have IBM, lack one or more of the Griggs pathological features at presentation, even on repeat biopsy.[8,11] Despite IBM being associated with a characteristic pattern of finger flexor and knee extensor weakness, not all patients have this pattern at disease onset, and muscle biopsy remains an important tool in differentiating IBM from its mimics. We sought to determine which additional pathological features support a diagnosis of IBM, demonstrating that characteristic p62 immunoreactive aggregates, strong MHC Class I upregulation, endomysial **CD3+ T-cell score >1**, **CD8+ T-cell score >0** and COX-/SDH+ fibres are features with sufficient sensitivity and specificity to differentiate IBM from pathologically similar myopathies and we propose an easily applied pathological algorithm for the diagnosis of IBM (Figure 4).

In agreement with previous studies, we observed p62,[18] TDP-43,[19] ubiquitin [13] and  $\alpha$ B-crystallin [20] immunoreactive aggregates and a predominantly endomysial inflammatory infiltrate [3] in Griggs pathologically-definite IBM. Diagnostic pathological studies of IBM have concentrated on differentiating IBM from other inflammatory myopathies and two recent quantitative studies have found that TDP-43 **and markers of autophagy such as** p62 and LC3 may be of diagnostic use.[21,22] However, in these studies only a fraction of each biopsy was analysed i.e. 200 fibres. We have found



1  
2  
3 this limited quantification does not correlate with the percentage of affected fibres in a biopsy nor  
4  
5 does it reflect the way in which a muscle biopsy is assessed. Additionally, studies have lacked  
6  
7 vacuolar myopathy control cases as it is believed that the inflammatory changes present in IBM  
8  
9 enable it to be easily differentiated from other vacuolar myopathies.[22] However, inflammatory  
10  
11 changes are frequently observed in muscular dystrophies and the degree of inflammatory change  
12  
13 necessary to confidently diagnose IBM is currently unknown.

14  
15  
16  
17 To mimic the typical diagnostic conundrums encountered in clinical practice, we evaluated the ability  
18  
19 of the pathological findings to differentiate IBM+RV from other vacuolar myopathies and IBM-RV  
20  
21 from steroid-responsive inflammatory myopathies. We found that quantitative analysis of protein  
22  
23 aggregates, congophilic deposits and COX-/SDH+ fibres was of limited diagnostic use. Analysing the  
24  
25 biopsies dichotomously and using a semi-quantitative score-tool revealed that increased MHC Class I  
26  
27 labelling was sensitive for IBM making it a good initial screening test, its absence excluding the  
28  
29 diagnosis. In agreement with an earlier study, we found p62 aggregates identified the largest number  
30  
31 of affected fibres in IBM.[23] Additionally, as a novel finding, the morphology and distribution of  
32  
33 p62 aggregates was characteristic in IBM. This characteristic pattern of p62 immunoreactive  
34  
35 aggregates was **highly sensitive** for IBM+RV (100%); their absence from a biopsy containing rimmed  
36  
37 vacuoles effectively ruling-out a diagnosis of IBM. We confirmed that the most diagnostically useful  
38  
39 pathological findings in IBM+RV were evidence of an immune mediated process; strong MHC Class  
40  
41 I staining, **endomysial CD3+ T-cell score >1** or an endomysial **CD8+ T-cell score >0** were diagnostic.  
42  
43 Having identified either of these features in a biopsy containing rimmed vacuoles no extra diagnostic  
44  
45 certainty was gained from observing partial invasion, COX-/SDH+ fibres or congophilic deposits.

46  
47  
48  
49 The most discriminative pathological tests for differentiating between IBM+RV and PM&DM were  
50  
51 COX/SDH staining and myotilin IHC. Consistent with a recent study,[9] we found the absence of  
52  
53 mitochondrial changes **casts doubt on a** diagnosis of IBM. There was no difference in the median age  
54  
55 between IBM-RV and PM&DM cases to account for the difference observed in COX-/SDH+ fibres.

1  
2  
3 The presence of myotilin and ubiquitin immunoreactive aggregates appeared to rule out a diagnosis of  
4 IBM-RV. However, we believe the presence of these features in IBM+RV indicates that they are  
5 unlikely to be diagnostically reliable features for differentiating between IBM-RV and steroid-  
6 responsive inflammatory myopathies. **Although no pathological feature was able to differentiate IBM-  
7 RV from steroid responsive inflammatory myopathies with certainty the presence of characteristic  
8 p62 aggregates and the absence of COX-/SDH+ fibres may help in supporting and opposing a  
9 diagnosis of IBM-RV respectively.** Pattern I p62 immunoreactive aggregates were only present in  
10 44% of the initial IBM-RV cases tested, but they were not observed in PM cases and were very rare in  
11 DM. **Although pattern I p62 aggregates appear to lack sensitivity their specificity was 91% making  
12 their presence highly suggestive of a diagnosis of IBM-RV.** However, we identified pattern I p62 in  
13 eight out of 11 (73%) further cases of IBM-RV that were assessed indicating a greater sensitivity and  
14 that p62 IHC warrants further investigation and validation in a larger, independent series. **The  
15 diagnostic utility of the other patterns of p62 staining is uncertain. Although pattern II appeared to  
16 have some specificity for myotilinopathy the small number of cases makes it drawing any conclusion  
17 problematic. In addition to p62 other autophagic proteins have been found in IBM and suggested as  
18 diagnostic markers. [22] Autophagy is a cellular mechanism for degrading and recycling cellular  
19 proteins and organelles and therefore, altered autophagy could lead to the accumulation of abnormal  
20 mitochondria and misfolded aggregation-prone proteins and may also result in altered antigen  
21 presentation leading to the widespread increase of MHC Class I and suggests that altered autophagy  
22 may play an important role in the pathogenesis of IBM.**

23  
24  
25  
26  
27  
28  
29  
30  
31  
32  
33  
34  
35  
36  
37  
38  
39  
40  
41  
42  
43  
44  
45  
46 Almost all pathological features - protein aggregates, congophilic deposits and inflammation - were  
47 more abundant in IBM+RV than IBM-RV. Despite using slightly different inclusion criteria, similar  
48 differences have been reported between pathologically-typical and pathologically-atypical IBM.[21]  
49 However, we found no differences in the number of COX-/SDH+ fibres, the degree of MHC Class I  
50 upregulation, the morphology and distribution of p62 immunoreactive aggregates or the pattern of the  
51 inflammation between IBM+RV and IBM-RV, supporting our clinical observations that these are the  
52  
53  
54  
55  
56  
57  
58  
59  
60

1  
2  
3 same disease. We believe that the pathological differences between IBM+RV and IBM-RV are, in  
4 part, due to differences in disease duration. Two studies have shown that rimmed vacuoles are more  
5 common in patients who are older at the time of muscle biopsy,[24,11] suggesting that they are  
6 associated with chronologically more advanced disease. Therefore, the pathological findings which  
7 are more abundant in IBM+RV and thought to be typical of IBM may instead be indicative of  
8 chronologically more advanced disease explaining their limited sensitivity at disease presentation.  
9 However, possibly due to the number of cases analysed, we were unable to confirm a relationship  
10 between pathological features and clinical findings. It could be argued that biopsies from different  
11 muscles may have affected the pathological findings observed and differences between IBM groups.  
12 However, in a recent review of 59 muscle biopsies from IBM cases in our clinical archive with  
13 quadriceps (n=31) and deltoid (n=28) biopsies we found no significant difference in the frequency of  
14 pathological findings.

15  
16  
17  
18  
19  
20  
21  
22  
23  
24  
25  
26  
27  
28  
29 A robust clinicopathological definition of IBM is of paramount importance for diagnosis and for  
30 selection and entry of patients into clinical trials. We have shown that certain pathological findings  
31 are more abundant than those included in the current pathologically-focussed diagnostic criteria.  
32 Moreover, p62 immunoreactive deposits, increased MHC Class I expression, endomysial CD3+ T-  
33 cells and CD8+ T-cells and COX-/SDH+ fibres have sufficient sensitivity and specificity to aid in the  
34 histological differentiation of IBM from disease mimics, supporting their inclusion in future  
35 diagnostic criteria for IBM alongside clinical criteria. Both CD3+ T-cells and CD8+ T-cells are  
36 included in the diagnostic algorithm as there was little difference in their sensitivity and specificity for  
37 differentiating IBM+RV from PAM. However, IHC staining for CD3+ T-cells is likely to be more  
38 widely available and avoids the costs of extra staining to subtype the inflammatory infiltrate enabling  
39 diagnostic algorithm to be used by a greater number diagnostic laboratories. Using our diagnostic  
40 algorithm, we found there would be little additional diagnostic security in identifying partial invasion,  
41 performing EM or staining for amyloid deposits. Finally, mitochondrial changes and MHC Class I up-  
42 regulation were the most consistent findings in our IBM cases suggesting that they are central to the

1  
2  
3 pathogenesis and that further investigation and therapeutic intervention should be directed towards  
4  
5 these features.  
6  
7

## 8 9 REFERENCES

- 10 1. Needham M, James I, Corbett A, Day T, Christiansen F, Phillips B, et al. Sporadic inclusion  
11 body myositis: phenotypic variability and influence of HLA-DR3 in a cohort of 57 Australian  
12 cases. *J Neurol Neurosurg Psychiatr*. 2008;79:1056–60.  
13
- 14 2. Griggs RC, Askanas V, DiMauro S, Engel A, Karpata G, Mendell JR, et al. Inclusion body  
15 myositis and myopathies. *Ann Neurol*. 1995;38:705–13.  
16
- 17 3. Arahata K, Engel AG. Monoclonal antibody analysis of mononuclear cells in myopathies. I:  
18 Quantitation of subsets according to diagnosis and sites of accumulation and demonstration and  
19 counts of muscle fibers invaded by T cells. *Ann Neurol*. 1984;16:193–208.  
20
- 21 4. Mhiri C, Gherardi R. Inclusion body myositis in French patients. A clinicopathological  
22 evaluation. *Neuropathol Appl Neurobiol*. 1990;16:333–44.  
23
- 24 5. Villanova M, Kawai M, Lübke U, Oh SJ, Perry G, Six J, et al. Rimmed vacuoles of inclusion  
25 body myositis and oculopharyngeal muscular dystrophy contain amyloid precursor protein and  
26 lysosomal markers. *Brain Res*. 1993;603:343–7.  
27
- 28 6. Van der Meulen MF, Hoogendijk JE, Moons KG, Veldman H, Badrising UA, Wokke JH.  
29 Rimmed vacuoles and the added value of SMI-31 staining in diagnosing sporadic inclusion  
30 body myositis. *Neuromuscul Disord*. 2001;11:447–51.  
31
- 32 7. Ferrer I, Olivé M. Molecular pathology of myofibrillar myopathies. *Expert Rev Mol Med*.  
33 2008;10:e25.  
34
- 35 8. Amato AA, Gronseth GS, Jackson CE, Wolfe GI, Katz JS, Bryan WW, et al. Inclusion body  
36 myositis: clinical and pathological boundaries. *Ann Neurol*. 1996;40:581–6.  
37
- 38 9. Chahin N, Engel AG. Correlation of muscle biopsy, clinical course, and outcome in PM and  
39 sporadic IBM. *Neurology*. 2008;70:418–24.  
40  
41  
42  
43  
44  
45  
46  
47  
48  
49  
50  
51  
52  
53  
54  
55  
56  
57  
58  
59  
60

10. Benveniste O, Guiguet M, Freebody J, Dubourg O, Squier W, Maisonobe T, et al. Long-term observational study of sporadic inclusion body myositis. *Brain*. 2011;134:3176–84.
11. Brady S, Squier W, Hilton-Jones D. Clinical assessment determines the diagnosis of inclusion body myositis independently of pathological features. *J Neurol Neurosurg Psychiatr*. 2013; 16.
12. Greenberg SA. Theories of the Pathogenesis of Inclusion Body Myositis. *Current Rheumatology Reports*. 2010;12:221–8.
13. Sherriff FE, Joachim CL, Squier MV, Esiri MM. Ubiquitinated inclusions in inclusion-body myositis patients are immunoreactive for cathepsin D but not  $\beta$ -amyloid. *Neuroscience Letters*. 1995;194:37–40.
14. Greenberg SA. How citation distortions create unfounded authority: analysis of a citation network. *BMJ*. 2009;339:b2680.
15. Needham M, and Mastaglia FL. (2007). Inclusion body myositis: current pathogenetic concepts and diagnostic and therapeutic approaches. *Lancet Neurol*. 6, 620–631.
16. Benveniste O, Hilton-Jones D. International Workshop on Inclusion Body Myositis held at the Institute of Myology, Paris, on 29 May 2009. *Neuromuscular Disorders*. 2010;20:414–21.
17. Wedderburn LR, Varsani H, Li CKC, Newton KR, Amato AA, Banwell B, et al. International consensus on a proposed score system for muscle biopsy evaluation in patients with juvenile dermatomyositis: a tool for potential use in clinical trials. *Arthritis Rheum*. 2007;57:1192–201.
18. Nogalska A, Terracciano C, D'Agostino C, King Engel W, Askanas V. p62/SQSTM1 is overexpressed and prominently accumulated in inclusions of sporadic inclusion-body myositis muscle fibers, and can help differentiating it from polymyositis and dermatomyositis. *Acta Neuropathol*. 2009;118:407–413.
19. Wehl CC, Temiz P, Miller SE, Watts G, Smith C, Forman M, Hanson PI, Kimonis V, Pestronk A. TDP-43 accumulation in inclusion body myopathy muscle suggests a common pathogenic mechanism with frontotemporal dementia. *J. Neurol. Neurosurg. Psychiatr*. 2008;79:1186–1189.

- 1  
2  
3 20. Banwell BL, Engel AG. Alpha B-crystallin immunolocalization yields new insights into  
4 inclusion body myositis. *Neurology*. 2000;54:1033–1041.  
5  
6  
7 21. Dubourg O, Wanschitz J, Maisonobe T, Béhin A, Allenbach Y, Herson S, and Benveniste O.  
8 Diagnostic value of markers of muscle degeneration in sporadic inclusion body myositis. *Acta*  
9 *Myol*. 2011. 30, 103–108.  
10  
11  
12 22. Hiniker A, Daniels BH, Lee HS, Margeta M. Comparative utility of LC3, p62 and TDP-43  
13 immunohistochemistry in differentiation of inclusion body myositis from polymyositis and  
14 related inflammatory myopathies. *Acta Neuropathologica Communications*. 2013. 1:29.  
15  
16  
17 23. D’Agostino C, Nogalska A, Engel WK, Askanas V. In sporadic inclusion-body myositis muscle  
18 fibres TDP-43-positive inclusions are less frequent and robust than p62-inclusions, and are not  
19 associated with paired helical filaments. *Neuropathol Appl Neurobiol*. 2010; Available from:  
20 <http://www.ncbi.nlm.nih.gov/pubmed/20626631>.  
21  
22  
23 24. Momma K, Noguchi S, Malicdan MCV, Hayashi YK, Minami N, Kamakura K, et al. Rimmed  
24 vacuoles in Becker muscular dystrophy have similar features with inclusion myopathies. *PLoS*  
25 *ONE*. 2012;7:e52002.  
26  
27  
28  
29  
30  
31  
32  
33  
34

### ACKNOWLEDGEMENTS

35  
36  
37 SB is funded by the Myositis Support Group. JLH is supported by the Reta Lila Weston Institute for  
38 Neurological Studies and the Myositis Support Group. This work was undertaken at UCLH/UCL who  
39 received a proportion of funding from the Department of Health’s NIHR Biomedical Research  
40 Centres funding scheme.  
41  
42  
43  
44  
45  
46  
47

### CONTRIBUTORSHIP STATEMENT

48  
49 Dr Stefen Brady - Acquisition of data, analysis and interpretation of data and drafting of manuscript.  
50  
51 Dr Waney Squier - Critical revision of manuscript for important intellectual content.  
52  
53 Prof. Caroline Sewry - Study concept and design and critical revision of manuscript for important  
54 intellectual content.  
55  
56  
57  
58  
59  
60

1  
2  
3 Prof. Mike Hanna - Critical revision of manuscript for important intellectual content.

4 Dr David Hilton-Jones - Critical revision of manuscript for important intellectual content.

5  
6  
7 Dr Janice Holton - Study concept and design, critical revision of manuscript for important intellectual  
8  
9 content and study supervision.

## 10 11 12 13 **DATA SHARING**

14 All additional data can be found in supplementary tables and figures.

### 15 16 17 **Supplementary Figure 1 Control staining in brain and muscle tissue**

18  
19 Positive and negative (no primary) brain control sections and normal muscle stained using  
20 immunohistochemistry for: p62 (A-C), TDP-43 (D-F),  $\alpha$  B-crystallin (G-I), ubiquitin (J-K) and  
21 myotilin (M,N) and alkalised congo red (O).  
22

23  
24 (A-C) Negative (A) and positive (B) control sections of AD brain and normal muscle (C) stained for  
25 p62. Positive control shows p62 positive neurofibrillary tangles and dystrophic neurites (B). No p62  
26 immunoreactivity is observed in normal muscle (C).  
27

28  
29 (D-F) Negative (D) and positive (E) control sections of FTLD-TDP brain and normal muscle (F)  
30 stained for TDP-43. Positive control shows normal nuclear labelling and mislocalised neuronal  
31 cytoplasmic staining with neuropil threads (E). Insert shows a neuron with absent nuclear TDP-43 and  
32 a cytoplasmic TDP-43 inclusion (E, red arrow and x100 insert). Nuclear TDP-43 staining is observed  
33 in normal muscle.  
34

35  
36 (G-I) Negative (G) and positive (H) control sections of CBD brain and normal muscle (I) stained for  $\alpha$   
37 B-crystallin. Positive control shows neuropil threads and a balloon cell neuron (H; red arrow and x100  
38 insert). No  $\alpha$  B-crystallin immunoreactivity is observed in normal muscle (I).  
39

40  
41 (J-L) Negative (J) and positive (K) control AD brain and normal muscle (L) stained for ubiquitin.  
42 Positive control shows dystrophic neurites and neuropil threads (K). No ubiquitin immunoreactivity is  
43 observed in normal muscle (L).  
44

45  
46 (M,N) Negative (M) and positive (N) control muscle stained for myotilin. Mild sarcoplasmic staining  
47 is observed in normal muscle (N).  
48

49 (O) Positive control section of AD brain showing an amyloid plaque (O).

50 Scale bar represents 100  $\mu$ m in A-D, F and H-M; and 50  $\mu$ m in E, N-O.

51 p62 = Sequestosome 1; AD = Alzheimer's disease; TDP-43 = Transactivation response DNA binding  
52 protein 43; FTLD-TDP = Frontotemporal lobar degeneration with TDP-43 positive inclusions; CBD =  
53 Corticobasal degeneration.  
54  
55  
56  
57  
58  
59  
60

### Supplementary Figure 2 IBM inflammatory score-tool

Score tool modified from the published juvenile dermatomyositis inflammatory (JDM) score tool [17] to specifically assess the type, degree and distribution of inflammation in IBM. The inflammatory domain was augmented to include T-cells, T-cell subtypes, B-cells and macrophages. MHC Class I staining was expanded to include three patterns of labelling. The vascular, muscle fibre and connective tissue domains which are present in the JDM score tool were not included.

### Figure 1 Protein aggregates and congophilic deposits in IBM

Stained cryostat sections, showing fibres, often in clusters, containing protein aggregates stained for p62 (A), TDP-43 (B), ubiquitin (C),  $\alpha$ B-crystallin (D) and myotilin (E). Protein aggregates were present throughout fibres, and were observed in apparently normal fibres, vacuolated fibres and fibres surrounded by inflammatory infiltrates. In fibres containing TDP-43 aggregates, myonuclear TDP-43 staining was frequently reduced (B). Congophilic deposits were observed in vacuolated fibres using epifluorescence (F). Tissue sections were examined using both the rhodamine red and fluorescein isothiocyanate filters to exclude areas of auto-fluorescence (arrow). Combined fluorescent image is shown. Four patterns of immunoreactivity were observed in IBM and disease controls stained for p62 using IHC (G)(H)(I)(J). Pattern I (G) - strongly stained, discrete and clearly delineated, round or angular aggregates, variable in number and size within a muscle fibre but rarely filling it and predominantly located subsarcolemmal, but also perinuclear and adjacent to vacuoles. Pattern II (H) - large aggregates of variable staining intensity. Pattern III (I) - fine granular aggregates dispersed throughout the fibre. Pattern IV (J) - fine granules and wisps of p62 immunoreactivity set within weakly basophilic inclusions.

Scale bar represents 50  $\mu$ m in A and D; 25  $\mu$ m in B, C and E-J.



1  
2  
3 **Figure 2 Percentage of muscle fibres containing protein aggregates and Griggs' pathological**  
4 **features**

5  
6  
7 Box and whisker plot illustrating the percentage of muscle fibres containing pathological  
8 abnormalities contained in the Griggs criteria and protein aggregates in Griggs' pathologically-  
9 definite IBM. Fibres containing aggregates immunoreactive for p62 and  $\alpha$ B-crystallin were more  
10 frequent than those containing the current diagnostic pathological features (red bars) ( $p < 0.05$ ). Protein  
11 aggregates recognised by all antibodies were found in a significantly larger number of fibres than  
12 partial invasion ( $p < 0.02$ ).  
13  
14  
15  
16  
17  
18  
19

20  
21 **Figure 3 Percentage of fibres containing protein aggregates and COX-/SDH+ fibres in each**  
22 **group**

23  
24  
25 Box and whisker plots illustrating the percentage of fibres in each diagnostic category containing p62  
26 (A), TDP-43 (B), myotilin (C) and ubiquitin (D) immunoreactive aggregates, congophilic deposits (E)  
27 and COX-/SDH+ fibres (F). All protein aggregates were present in a greater percentage of fibres in  
28 IBM+RV than in IBM-RV. There was no difference in the percentage of COX-/SDH+ muscle fibres  
29 between these groups. IBM+RV biopsies had a greater percentage of fibres containing p62 (A) and  
30 TDP-43 (B) immunoreactive aggregates and COX-/SDH+ fibres (F) than PAM. Pathological findings  
31 were similar in IBM-RV and PM&DM, with no differences in the percentage of fibres containing p62  
32 (A), TDP-43 (B) and ubiquitin (D) immunoreactive aggregates or congophilic deposits (E). However,  
33 there was a greater percentage of COX-/SDH+ fibres (F) in IBM-RV than PM&DM and a greater  
34 percentage of fibres containing myotilin immunoreactive aggregates (C) in PM&DM than IBM-RV.  
35  
36  
37  
38  
39  
40  
41  
42  
43  
44  
45  
46 \*Statistically significant results.  
47  
48

49 **Supplementary Figure 3 Sensitivity and specificity of rimmed vacuoles, protein aggregates and**  
50 **mitochondrial changes in IBM+RV compared to PAM**

51  
52 Receiver operating characteristic curves for each test including the area under the curve and optimum  
53 cut-off with its associated sensitivity and specificity for rimmed vacuoles (A), myotilin (B), ubiquitin  
54 (C), TDP-43 (D), p62 (E) immunoreactive deposits, congophilic deposits (F) and COX-/SDH+ fibres  
55  
56  
57  
58  
59  
60

1  
2  
3 (G). COX/SDH HC staining was the most discriminative test for differentiating IBM+RV and PAM  
4  
5 (G). However, there was little difference between COX/SDH HC staining, TDP-43 and p62 IHC  
6  
7 staining and none were sufficiently discriminative to be considered diagnostic. AUC = Area under the  
8  
9 curve.  
10

#### 11 12 13 **Supplementary Figure 4 Sensitivity and specificity of protein aggregates and mitochondrial** 14 **changes in IBM-RV compared to PM&DM**

15  
16 Receiver operating characteristic curves for each test showing the area under the curve and optimum  
17  
18 cut-off with its sensitivity and specificity for myotilin (A), ubiquitin (B), TDP-43 (C), p62 (D)  
19  
20 immunoreactive deposits, congophilic deposits (E) and COX-/SDH+ fibres (F). COX/SDH  
21  
22 histochemical staining (F) and myotilin (G) IHC were the most discriminative tests for differentiating  
23  
24 IBM-RV and PM&DM. AUC = Area under the curve.  
25  
26  
27  
28

#### 29 **Figure 4 Proposed diagnostic algorithm for IBM based on pathological findings**

30  
31 Flow diagram showing a proposed pathway for diagnosing IBM based on the pathological findings.  
32  
33 Increased MHC Class I staining was observed in all cases of IBM and pattern I p62 aggregates in all  
34  
35 cases of IBM+RV making them good initial screening tests. Their absence rules-out a diagnosis of  
36  
37 IBM and IBM+RV respectively. The presence of **endomysial CD3+ T-cell score >1**, endomysial  
38  
39 **CD8+ T-cell score >0** or strong MHC Class I staining in a biopsy with rimmed vacuoles and p62  
40  
41 aggregates secures a diagnosis of IBM+RV. Differentiating IBM-RV and PM&DM pathologically is  
42  
43 more challenging. The presence of COX-/SDH+ fibres is not specific to IBM-RV; **although COX-**  
44  
45 **/SDH+ fibres were not present in every case of IBM-RV their absence casts doubt on the diagnosis of**  
46  
47 **IBM-RV**. Pattern I p62 aggregates may enable IBM to be differentiated from PM when present.  
48  
49 However, they may lack sensitivity for IBM-RV, therefore their absence does not rule out the  
50  
51 diagnosis.  
52  
53  
54  
55  
56  
57  
58  
59  
60



Figure 1 Protein aggregates and congophilic deposits in IBM

Stained cryostat sections, showing fibres, often in clusters, containing protein aggregates stained for p62 (A), TDP-43 (B), ubiquitin (C),  $\alpha$ B-crystallin (D) and myotilin (E). Protein aggregates were present throughout fibres, and were observed in apparently normal fibres, vacuolated fibres and fibres surrounded by inflammatory infiltrates. In fibres containing TDP-43 aggregates, myonuclear TDP-43 staining was frequently reduced (B). Congophilic deposits were observed in vacuolated fibres using epifluorescence (F).

Tissue sections were examined using both the rhodamine red and fluorescein isothiocyanate filters to exclude areas of auto-fluorescence (arrow). Combined fluorescent image is shown. Four patterns of immunoreactivity were observed in IBM and disease controls stained for p62 using IHC (G)(H)(I)(J). Pattern I (G) - strongly stained, discrete and clearly delineated, round or angular aggregates, variable in number and size within a muscle fibre but rarely filling it and predominantly located subsarcolemmal, but also perinuclear and adjacent to vacuoles. Pattern II (H) - large aggregates of variable staining intensity. Pattern III (I) - fine granular aggregates dispersed throughout the fibre. Pattern IV (J) - fine granules and wisps of

1  
2  
3  
4  
5  
6  
7  
8  
9  
10  
11  
12  
13  
14  
15  
16  
17  
18  
19  
20  
21  
22  
23  
24  
25  
26  
27  
28  
29  
30  
31  
32  
33  
34  
35  
36  
37  
38  
39  
40  
41  
42  
43  
44  
45  
46  
47  
48  
49  
50  
51  
52  
53  
54  
55  
56  
57  
58  
59  
60

p62 immunoreactivity set within weakly basophilic inclusions.  
Scale bar represents 50 µm in A and D; 25 µm in B, C and E-J.

161x305mm (300 x 300 DPI)

For peer review only



Figure 2 Percentage of muscle fibres containing protein aggregates and Griggs' pathological features. Box and whisker plot illustrating the percentage of muscle fibres containing pathological abnormalities contained in the Griggs criteria and protein aggregates in Griggs' pathologically-definite IBM. Fibres containing aggregates immunoreactive for p62 and  $\alpha$ B-crystallin were more frequent than those containing the current diagnostic pathological features (red bars) ( $p < 0.05$ ). Protein aggregates recognised by all antibodies were found in a significantly larger number of fibres than partial invasion ( $p < 0.02$ ).

97x99mm (300 x 300 DPI)



Figure 3 Percentage of fibres containing protein aggregates and COX-/SDH+ fibres in each group. Box and whisker plots illustrating the percentage of fibres in each diagnostic category containing p62 (A), TDP-43 (B), myotilin (C) and ubiquitin (D) immunoreactive aggregates, congophilic deposits (E) and COX-/SDH+ fibres (F). All protein aggregates were present in a greater percentage of fibres in IBM+RV than in IBM-RV. There was no difference in the percentage of COX-/SDH+ muscle fibres between these groups. IBM+RV biopsies had a greater percentage of fibres containing p62 (A) and TDP-43 (B) immunoreactive aggregates and COX-/SDH+ fibres (F) than PAM. Pathological findings were similar in IBM-RV and PM&DM, with no differences in the percentage of fibres containing p62 (A), TDP-43 (B) and ubiquitin (D) immunoreactive aggregates or congophilic deposits (E). However, there was a greater percentage of COX-/SDH+ fibres (F) in IBM-RV than PM&DM and a greater percentage of fibres containing myotilin immunoreactive aggregates (C) in PM&DM than IBM-RV. \*Statistically significant results.

168x226mm (300 x 300 DPI)

1  
2  
3  
4  
5  
6  
7  
8  
9  
10  
11  
12  
13  
14  
15  
16  
17  
18  
19  
20  
21  
22  
23  
24  
25  
26  
27  
28  
29  
30  
31  
32  
33  
34  
35  
36  
37  
38  
39  
40  
41  
42  
43  
44  
45  
46  
47  
48  
49  
50  
51  
52  
53  
54  
55  
56  
57  
58  
59  
60

For peer review only



Figure 4 Proposed diagnostic algorithm for IBM based on pathological findings

Flow diagram showing a proposed pathway for diagnosing IBM based on the pathological findings. Increased MHC Class I staining was observed in all cases of IBM and pattern I p62 aggregates in all cases of IBM+RV making them good initial screening tests. Their absence rules-out a diagnosis of IBM and IBM+RV respectively. The presence of endomysial CD3+ T-cell score >1, endomysial CD8+ T-cell score >0 or strong MHC Class I staining in a biopsy with rimmed vacuoles and p62 aggregates secures a diagnosis of IBM+RV. Differentiating IBM-RV and PM&DM pathologically is more challenging. The presence of COX-/SDH+ fibres is not specific to IBM-RV; although COX-/SDH+ fibres were not present in every case of IBM-RV their absence casts doubt on the diagnosis of IBM-RV. Pattern I p62 aggregates may enable IBM to be differentiated from PM when present. However, they may lack sensitivity for IBM-RV, therefore their absence does not rule out the diagnosis.

254x190mm (300 x 300 DPI)



**Supplementary Table 1 Clinical characteristics**

| Characteristic                               | G-IBM              | IBM+RV             | IBM-RV            | PM&DM              | PAM                | IBM+RV*          | IBM-RV*          |
|----------------------------------------------|--------------------|--------------------|-------------------|--------------------|--------------------|------------------|------------------|
| Number of cases                              | 6                  | 15                 | 9                 | 11                 | 7                  | 12               | 11               |
| Male:female                                  | 5:1                | 10:5               | 4:5               | 4:3                | 4:7                | 10:2             | 9:2              |
| Median age at symptom onset, years (IQR)     | 69 (66-70)         | 54 (49-67)         | 62 (48-68)        | 55 (34-65)         | 46 (24-54)         | 58 (55-73)       | 60 (57-72)       |
| Median age at muscle biopsy, years (IQR)     | 77 (68-78)         | 64 (59-71)         | 68 (47-74)        | 55 (34-65)         | 54 (29-59)         | 66 (62-77)       | 70 (63-74)       |
| Median duration of symptoms, years (IQR)     | 5 (3-9)            | 5 (4-7)            | 3 (2-8)           | 0 (0-0)            | 5 (3-9)            | 5 (4-7)          | 4 (3-7)          |
| Mean creatine kinase, IU/L, mean ( $\pm$ SD) | 377 ( $\pm$ 213)   | 1748 ( $\pm$ 1348) | 926 ( $\pm$ 800)  | 6744 ( $\pm$ 5875) | 739 ( $\pm$ 320)   | 662 ( $\pm$ 360) | 466 ( $\pm$ 338) |
| Mean number of muscle fibres per biopsy      | 2929 ( $\pm$ 1357) | 1463 ( $\pm$ 954)  | 1795 ( $\pm$ 990) | 3534 ( $\pm$ 1934) | 2749 ( $\pm$ 1357) | NA               | NA               |

G-IBM = Griggs' pathologically-definite IBM; IQR = Interquartile range; SD = Standard deviation; NA = Not applicable. \*Cases used to test proposed diagnostic flow-chart.

Supplementary Table 2 Clinical inclusion criteria

| Diagnostic category | Criteria                                                                                                                                                                                                                                                                                                                                                                                                                                                                                                            |
|---------------------|---------------------------------------------------------------------------------------------------------------------------------------------------------------------------------------------------------------------------------------------------------------------------------------------------------------------------------------------------------------------------------------------------------------------------------------------------------------------------------------------------------------------|
| G-IBM               | Patients fulfilling Griggs' definite criteria (rimmed vacuoles, inflammatory infiltrate with partial invasion of fibres and 15-18 nm tubulofilaments on EM) with prominent finger flexor and knee extensor weakness and CK <12 x ULN.                                                                                                                                                                                                                                                                               |
| IBM+RV              | Age at symptom onset >45 years, symptoms present for >12 months, finger flexion strength less than shoulder abduction strength and knee extension weakness greater than hip flexion weakness, CK ≤15 x ULN and a muscle biopsy revealing rimmed vacuoles on H&E or GT stained sections without features inconsistent with IBM on a standard diagnostic histological assessment <b>for an inflammatory myopathy*</b> .                                                                                               |
| IBM-RV              | Clinical features and CK as detailed under IBM+RV. Rimmed vacuoles absent on H&E and GT stained sections and without features inconsistent with IBM on a standard diagnostic histological assessment <b>for an inflammatory myopathy*</b> .                                                                                                                                                                                                                                                                         |
| PAM                 | Genetically or clinically and pathologically confirmed cases of PAM with typical rimmed vacuoles present on muscle biopsy <b>and a genetically confirmed dystrophinopathy with typical rimmed vacuoles and protein aggregates present on muscle biopsy</b> . Cases included myotilinopathy (n=2), hIBM with compound heterozygous mutations in GNE (n=1), IBMPFD with mutation in VCP (n=1), genetically unconfirmed cases of myofibrillar myopathy (n=2), and dystrophinopathy with deletion of exons 45-47 (n=1). |
| PM&DM               | Subacute onset of limb girdle weakness, significantly raised CK, inflammatory cell infiltrate present on muscle biopsy and a sustained unequivocal clinical and biochemical response to steroid immunosuppression. DM cases also had to have cutaneous manifestations consistent with the diagnosis.                                                                                                                                                                                                                |
| Normal controls     | Patients investigated for cramps or fatigue, normal clinical examination performed by a muscle specialist, normal CK, normal neurophysiological assessment and normal muscle biopsy.                                                                                                                                                                                                                                                                                                                                |

G-IBM = Griggs' pathologically-definite IBM; IBM+RV = Clinically-typical IBM with rimmed vacuoles; IBM-RV = Clinically typical IBM lacking rimmed vacuoles; PAM = Protein accumulation myopathies with rimmed vacuoles; PM&DM = Steroid-responsive inflammatory myopathies; hIBM = Hereditary inclusion body myopathy; IBMPFD = Inclusion body myopathy with Paget's disease and frontotemporal dementia; CK = Creatine kinase; GT = Gomori trichrome; ULN = Upper limit of normal. **\* Standard histological assessment for inflammatory myopathy includes H&E, GT, Sudan black or oil red O, periodic acid Schiff, nicotinamide adenine dinucleotide dehydrogenase, succinate dehydrogenase, cytochrome c oxidase, combined cytochrome c oxidase and succinate dehydrogenase, phosphorylase, acid and alkaline phosphatase, adenylate deaminase, ATPases at pH 4.2/4.3/9.4 and immunohistochemical staining including neonatal myosin, utrophin, major histocompatibility complex class I, membrane attack complex and a combination of inflammatory cell markers.**

Supplementary Table 3 Antibodies and optimum staining conditions

| Antibody                | Source            | Clone | Control tissue | Fixative   | Dilution | Primary incubation conditions† |
|-------------------------|-------------------|-------|----------------|------------|----------|--------------------------------|
| p62                     | BD Transduction   | 3/P62 | AD brain       | A          | 1:400    | 1 hour, RT                     |
| TDP-43                  | Proteintech       | NA    | FTLD-TDP brain | PFA        | 1:800    | 24 hours, 4°C                  |
| Tau*                    | Dako              | NA    | AD brain       | A          | 1:1600   | 1 hour, RT                     |
| Phosphorylated tau**    | Autogen Bioclear  | AT8   | AD brain       | A          | 1:1600   | 1 hour, RT                     |
| Ubiquitin               | Dako              | NA    | AD brain       | A          | 1:100    | 1 hour, RT                     |
| A $\beta$               | Dako              | 6F/3D | AD brain       | PFA and FA | 1:100    | 1 hour, RT                     |
| $\alpha$ -synuclein     | Abcam             | 4D6   | MSA brain      | PBS        | 1:800    | 1 hour, RT                     |
| FUS                     | Novus Biologicals | NA    | FTLD-FUS brain | A          | 1:2000   | 1 hour, RT                     |
| Desmin                  | Dako              | D33   | Normal muscle  | A          | 1:50     | 24 hours, 4°C                  |
| Myotilin                | Novocastra        | RSO34 | Normal muscle  | A          | 1:500    | 24 hours, 4°C                  |
| $\alpha$ B-crystallin   | Novocastra        | G2JF  | CBD brain      | A          | 1:300    | 1 hour, RT                     |
| VCP                     | Abcam             | 5     | Normal muscle  | A          | 1:100    | 1 hour, RT                     |
| Lamin A/C               | Novocastra        | 636   | Normal muscle  | A          | 1:50     | 1 hour, RT                     |
| Emerin                  | Novocastra        | 4G5   | Normal muscle  | A          | 1:400    | 1 hour, RT                     |
| MHC Class I             | Novocastra        | W6/32 | Normal muscle  | A          | 1:25     | 24 hours, 4°C                  |
| CD3 (T-cells)           | Novocastra        | UCHT1 | Tonsil         | A          | 1:100    | 1 hour, RT                     |
| CD4 (Helper T-cells)    | Novocastra        | 4B12  | Tonsil         | A          | 1:400    | 1 hour, RT                     |
| CD8 (Cytotoxic T-cells) | Novocastra        | 1A5   | Tonsil         | A          | 1:50     | 1 hour, RT                     |
| CD20 (B-cells)          | Novocastra        | L26   | Tonsil         | A          | 1:400    | 1 hour, RT                     |
| CD68 (Macrophages)      | Novocastra        | KP1   | Tonsil         | A          | 1:1600   | 1 hour, RT                     |

NA = Not applicable; AD = Alzheimer's disease; FTLD-TDP = Frontotemporal lobar degeneration with TDP-43 positive inclusions; MSA = Multiple system atrophy; FTLD-FUS = Frontotemporal lobar degeneration with FUS positive inclusions; CBD = Corticobasal degeneration; A = Acetone; PFA = 4% Paraformaldehyde; FA = Formic acid; PBS = Phosphate buffered saline; RT = Room temperature. Antibodies were directed at \* amino acids 243-441 irrespective of phosphorylation and \*\* phosphorylated Ser202. †Primary antibodies were made up in PBS and primary antibody-antigen binding was visualised with Dako REAL™ EnVision™ Detection System which includes a horseradish-peroxidase labelled goat anti-rabbit/mouse secondary and 1:50 solution of 3,3'-diaminobenzidine as the chromagen.

## Supplementary Table 4 Definitions of pathological features

| Pathological feature                         | Definition                                                                                                                                                                                                                                                                                                                                                                                                                                                                                                        |
|----------------------------------------------|-------------------------------------------------------------------------------------------------------------------------------------------------------------------------------------------------------------------------------------------------------------------------------------------------------------------------------------------------------------------------------------------------------------------------------------------------------------------------------------------------------------------|
| Rimmed vacuoles                              | Irregular vacuole with a granular basophilic rim or containing granular basophilic material when stained with H&E or stained red in the GT. Both H&E and GT stained sections were reviewed before concluding the absence of rimmed vacuoles.                                                                                                                                                                                                                                                                      |
| Inflammatory infiltrate and partial invasion | Inflammatory cells must show a nucleus fully circumscribed by a ring of positive staining. T-cells and B-cells must have a lymphoid morphology. Partial invasion was defined as unequivocal invasion of an otherwise structurally normal fibre by one or more inflammatory cells on H&E stained sections or sections stained using IHC.                                                                                                                                                                           |
| Protein aggregates                           | Area of definite staining within a transversely orientated muscle fibre. Diffuse staining affecting the whole of a fibre was not counted nor were protein aggregates in necrotic fibres or regenerating fibres.                                                                                                                                                                                                                                                                                                   |
| Congophilic deposits                         | Assessed using polarising and fluorescence microscopes. Positive staining using a polarising microscope was defined as congophilic deposits within a muscle fibre that exhibited apple-green birefringence under polarised light. Positive staining with a fluorescence microscope was defined as fluorescent material within a muscle fibre only visible under the rhodamine red filter. Areas of auto-fluorescence were excluded by visualising areas of fluorescence with both rhodamine red and FITC filters. |

GT = Gomori trichrome; FITC = Fluorescein isothiocyanate.

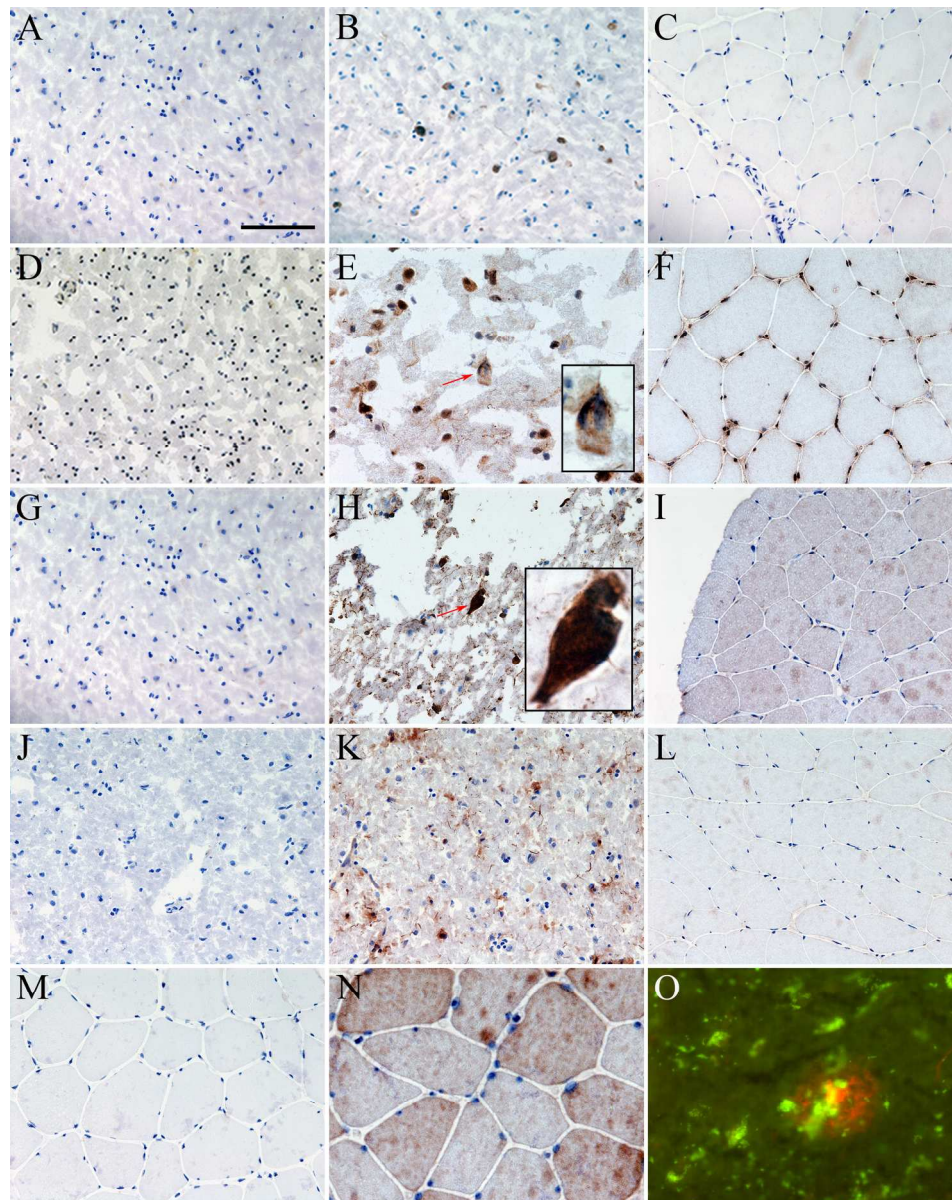

Supplementary Figure 1 Control staining in brain and muscle tissue

Positive and negative (no primary) brain control sections and normal muscle stained using immunohistochemistry for: p62 (A-C), TDP-43 (D-F), a B-crystallin (G-I), ubiquitin (J-K) and myotilin (M,N) and alkalised congo red (O).

(A-C) Negative (A) and positive (B) control sections of AD brain and normal muscle (C) stained for p62. Positive control shows p62 positive neurofibrillary tangles and dystrophic neurites (B). No p62 immunoreactivity is observed in normal muscle (C).

(D-F) Negative (D) and positive (E) control sections of FTLD-TDP brain and normal muscle (F) stained for TDP-43. Positive control shows normal nuclear labelling and mislocalised neuronal cytoplasmic staining with neuropil threads (E). Insert shows a neuron with absent nuclear TDP-43 and a cytoplasmic TDP-43 inclusion (E, red arrow and x100 insert). Nuclear TDP-43 staining is observed in normal muscle.

(G-I) Negative (G) and positive (H) control sections of CBD brain and normal muscle (I) stained for a B-crystallin. Positive control shows neuropil threads and a balloon cell neuron (H; red arrow and x100 insert).

1  
2  
3 No  $\alpha$  B-crystallin immunoreactivity is observed in normal muscle (I).  
4 (J-L) Negative (J) and positive (K) control AD brain and normal muscle (L) stained for ubiquitin. Positive  
5 control shows dystrophic neurites and neuropil threads (K). No ubiquitin immunoreactivity is observed in  
6 normal muscle (L).

7 (M,N) Negative (M) and positive (N) control muscle stained for myotilin. Mild sarcoplasmic staining is  
8 observed in normal muscle (N).

9 (O) Positive control section of AD brain showing an amyloid plaque (O).

10 Scale bar represents 100  $\mu$ m in A-D, F and H-M; and 50  $\mu$ m in E, N-O.

11 p62 = Sequestosome 1; AD = Alzheimer's disease; TDP-43 = Transactivation response DNA binding protein  
12 43; FTL-D-TDP = Frontotemporal lobar degeneration with TDP-43 positive inclusions; CBD = Corticobasal  
13 degeneration.

14 171x215mm (300 x 300 DPI)

15  
16  
17  
18  
19  
20  
21  
22  
23  
24  
25  
26  
27  
28  
29  
30  
31  
32  
33  
34  
35  
36  
37  
38  
39  
40  
41  
42  
43  
44  
45  
46  
47  
48  
49  
50  
51  
52  
53  
54  
55  
56  
57  
58  
59  
60

For peer review only



1  
2  
3  
4  
5  
6  
7  
8  
9  
10  
11  
12  
13  
14  
15  
16  
17  
18  
19  
20  
21  
22  
23  
24  
25  
26  
27  
28  
29  
30  
31  
32  
33  
34  
35  
36  
37  
38  
39  
40  
41  
42  
43  
44  
45  
46  
47  
48  
49  
50  
51  
52  
53  
54  
55  
56  
57  
58  
59  
60

**IBM Inflammatory Score Tool**

Case Number: \_\_\_\_\_ Date: \_\_\_\_\_

| Score                           |         | Description                                                                                                                                                                                                                                                                                                                                                                                   |
|---------------------------------|---------|-----------------------------------------------------------------------------------------------------------------------------------------------------------------------------------------------------------------------------------------------------------------------------------------------------------------------------------------------------------------------------------------------|
| <b>T-cells (CD3)</b>            |         |                                                                                                                                                                                                                                                                                                                                                                                               |
| CD3+ endomysial infiltration    | 0, 1, 2 | For each inflammatory cell type in the endomysial, perimysial and perivascular locations score positive infiltrating cells as follows: if none or <4 cells in a x20 field- score 0; if >4 cells in a x20 field and/or 1 cluster (where a cluster is ≥10 cells) - score 1; if >2 clusters in the entire biopsy, and/or diffusely infiltrating cells (i.e.> 20 cells in a x20 field) - score 2. |
| CD3+ perimysial infiltration    | 0, 1, 2 |                                                                                                                                                                                                                                                                                                                                                                                               |
| CD3+ perivascular infiltration  | 0, 1, 2 |                                                                                                                                                                                                                                                                                                                                                                                               |
| <b>Helper T-cells (CD4)</b>     |         |                                                                                                                                                                                                                                                                                                                                                                                               |
| CD4+ endomysial infiltration    | 0, 1, 2 |                                                                                                                                                                                                                                                                                                                                                                                               |
| CD4+ perimysial infiltration    | 0, 1, 2 |                                                                                                                                                                                                                                                                                                                                                                                               |
| CD4+ perivascular infiltration  | 0, 1, 2 |                                                                                                                                                                                                                                                                                                                                                                                               |
| <b>Cytotoxic T-cells (CD8)</b>  |         |                                                                                                                                                                                                                                                                                                                                                                                               |
| CD8+ endomysial infiltration    | 0, 1, 2 |                                                                                                                                                                                                                                                                                                                                                                                               |
| CD8+ perimysial infiltration    | 0, 1, 2 |                                                                                                                                                                                                                                                                                                                                                                                               |
| CD8+ perivascular infiltration  | 0, 1, 2 |                                                                                                                                                                                                                                                                                                                                                                                               |
| <b>B-cells (CD20)</b>           |         |                                                                                                                                                                                                                                                                                                                                                                                               |
| CD20+ endomysial infiltration   | 0, 1, 2 |                                                                                                                                                                                                                                                                                                                                                                                               |
| CD20+ perimysial infiltration   | 0, 1, 2 |                                                                                                                                                                                                                                                                                                                                                                                               |
| CD20+ perivascular infiltration | 0, 1, 2 |                                                                                                                                                                                                                                                                                                                                                                                               |
| <b>Macrophages (CD68)</b>       |         |                                                                                                                                                                                                                                                                                                                                                                                               |
| CD68+ endomysial infiltration   | 0, 1, 2 |                                                                                                                                                                                                                                                                                                                                                                                               |
| CD68+ perimysial infiltration   | 0, 1, 2 |                                                                                                                                                                                                                                                                                                                                                                                               |
| CD68+ perivascular infiltration | 0, 1, 2 |                                                                                                                                                                                                                                                                                                                                                                                               |
| MHC Class I                     | 0, 1, 2 | For the whole biopsy score as follows: normal (capillary staining only) - score 0; if increased: i) mildly (weak diffuse sarcolemmal staining or scattered positive muscle fibres) - score 1; ii) strongly increased (diffuse definite sarcoplasmic and sarcolemmal increase in staining) score 2.                                                                                            |

Supplementary Figure 2 IBM inflammatory score-tool  
Score tool modified from the published juvenile dermatomyositis inflammatory (JDM) score tool [17] to specifically assess the type, degree and distribution of inflammation in IBM. The inflammatory domain was augmented to include T-cells, T-cell subtypes, B-cells and macrophages. MHC Class I staining was expanded to include three patterns of labelling. The vascular, muscle fibre and connective tissue domains which are present in the JDM score tool were not included.

188x255mm (300 x 300 DPI)



Supplementary Figure 3 Sensitivity and specificity of rimmed vacuoles, protein aggregates and mitochondrial changes in IBM+RV compared to PAM

Receiver operating characteristic curves for each test including the area under the curve and optimum cut-off with its associated sensitivity and specificity for rimmed vacuoles (A), myotilin (B), ubiquitin (C), TDP-43 (D), p62 (E) immunoreactive deposits, congophilic deposits (F) and COX-/SDH+ fibres (G). COX/SDH HC staining was the most discriminative test for differentiating IBM+RV and PAM (G). However, there was little difference between COX/SDH HC staining, TDP-43 and p62 IHC staining and none were sufficiently discriminative to be considered diagnostic. AUC = Area under the curve.

165x211mm (300 x 300 DPI)





Supplementary Figure 4 Sensitivity and specificity of protein aggregates and mitochondrial changes in IBM-RV compared to PM&DM

Receiver operating characteristic curves for each test showing the area under the curve and optimum cut-off with its sensitivity and specificity for myotilin (A), ubiquitin (B), TDP-43 (C), p62 (D) immunoreactive deposits, congophilic deposits (E) and COX-/SDH+ fibres (F). COX/SDH histochemical staining (F) and myotilin (G) IHC were the most discriminative tests for differentiating IBM-RV and PM&DM. AUC = Area under the curve.

170x139mm (300 x 300 DPI)

**STARD checklist for reporting of studies of diagnostic accuracy**  
(version January 2003)

| Section and Topic           | Item # |                                                                                                                                                                                                 | On page #                                                                                                                                             |
|-----------------------------|--------|-------------------------------------------------------------------------------------------------------------------------------------------------------------------------------------------------|-------------------------------------------------------------------------------------------------------------------------------------------------------|
| TITLE/ABSTRACT/<br>KEYWORDS | 1      | Identify the article as a study of diagnostic accuracy (recommend MeSH heading 'sensitivity and specificity').                                                                                  | Pg 1,2                                                                                                                                                |
| INTRODUCTION                | 2      | State the research questions or study aims, such as estimating diagnostic accuracy or comparing accuracy between tests or across participant groups.                                            | Pg 2-4                                                                                                                                                |
| <b>METHODS</b>              |        |                                                                                                                                                                                                 |                                                                                                                                                       |
| <i>Participants</i>         | 3      | The study population: The inclusion and exclusion criteria, setting and locations where data were collected.                                                                                    | Pg 4 and<br>Supplementary<br>Tables 1 and 2                                                                                                           |
|                             | 4      | Participant recruitment: Was recruitment based on presenting symptoms, results from previous tests, or the fact that the participants had received the index tests or the reference standard?   | Both. Pg 4 and<br>Supplementary Table<br>2                                                                                                            |
|                             | 5      | Participant sampling: Was the study population a consecutive series of participants defined by the selection criteria in item 3 and 4? If not, specify how participants were further selected.  | Patients identified<br>from clinics and<br>systematic search of<br>pathological<br>databases                                                          |
|                             | 6      | Data collection: Was data collection planned before the index test and reference standard were performed (prospective study) or after (retrospective study)?                                    | Retrospective study                                                                                                                                   |
| <i>Test methods</i>         | 7      | The reference standard and its rationale.                                                                                                                                                       | Clinical features and<br>follow-up                                                                                                                    |
|                             | 8      | Technical specifications of material and methods involved including how and when measurements were taken, and/or cite references for index tests and reference standard.                        | Pg 4-6 and<br>Supplementary Table<br>3                                                                                                                |
|                             | 9      | Definition of and rationale for the units, cut-offs and/or categories of the results of the index tests and the reference standard.                                                             | Pg 6                                                                                                                                                  |
|                             | 10     | The number, training and expertise of the persons executing and reading the index tests and the reference standard.                                                                             | Two qualified<br>medical doctors.<br>Neuropathologist and<br>Neurologist with an<br>interest and<br>significant<br>experience in muscle<br>pathology. |
|                             | 11     | Whether or not the readers of the index tests and reference standard were blind (masked) to the results of the other test and describe any other clinical information available to the readers. | All analyses were<br>blinded and<br>performed in a<br>random order. No<br>clinical information<br>was available at the<br>time of analyses.           |
| <i>Statistical methods</i>  | 12     | Methods for calculating or comparing measures of diagnostic accuracy, and the statistical methods used to quantify uncertainty (e.g. 95% confidence intervals).                                 | Pg 6 includes tests<br>for determining<br>diagnostic accuracy<br>including 2x2 tables<br>and ROC curves.                                              |
|                             | 13     | Methods for calculating test reproducibility, if done.                                                                                                                                          | Bland-Altman plots<br>and Cohen's Kappa<br>statistic used.                                                                                            |
| <b>RESULTS</b>              |        |                                                                                                                                                                                                 |                                                                                                                                                       |
| <i>Participants</i>         | 14     | When study was performed, including beginning and end dates of recruitment.                                                                                                                     | 2011-2013                                                                                                                                             |
|                             | 15     | Clinical and demographic characteristics of the study population (at least information on age, gender, spectrum of presenting symptoms).                                                        | Included in<br>Supplementary Table<br>1                                                                                                               |

|                     |    |                                                                                                                                                                                                                                                     |                                                                                                                                                                   |
|---------------------|----|-----------------------------------------------------------------------------------------------------------------------------------------------------------------------------------------------------------------------------------------------------|-------------------------------------------------------------------------------------------------------------------------------------------------------------------|
|                     | 16 | The number of participants satisfying the criteria for inclusion who did or did not undergo the index tests and/or the reference standard; describe why participants failed to undergo either test (a flow diagram is strongly recommended).        | Not applicable. Retrospective study.                                                                                                                              |
| <i>Test results</i> | 17 | Time-interval between the index tests and the reference standard, and any treatment administered in between.                                                                                                                                        | Study performed using tissue taken at the time of the reference standard                                                                                          |
|                     | 18 | Distribution of severity of disease (define criteria) in those with the target condition; other diagnoses in participants without the target condition.                                                                                             | Diagnoses of control cases included Supplementary Table 2                                                                                                         |
|                     | 19 | A cross tabulation of the results of the index tests (including indeterminate and missing results) by the results of the reference standard; for continuous results, the distribution of the test results by the results of the reference standard. | Tables 1 and 2                                                                                                                                                    |
|                     | 20 | Any adverse events from performing the index tests or the reference standard.                                                                                                                                                                       | Not applicable.                                                                                                                                                   |
| <i>Estimates</i>    | 21 | Estimates of diagnostic accuracy and measures of statistical uncertainty (e.g. 95% confidence intervals).                                                                                                                                           | Included in Tables 1 and 2 and Supplementary Figures 2 and 3                                                                                                      |
|                     | 22 | How indeterminate results, missing data and outliers of the index tests were handled.                                                                                                                                                               | Only one missing result and this is documented in Table 2. The denominator for calculating the proportion was altered to account for missing case in calculations |
|                     | 23 | Estimates of variability of diagnostic accuracy between subgroups of participants, readers or centers, if done.                                                                                                                                     | Included in statistical analysis Pg 6                                                                                                                             |
|                     | 24 | Estimates of test reproducibility, if done.                                                                                                                                                                                                         | Included in statistical analysis Pg 6                                                                                                                             |
| DISCUSSION          | 25 | Discuss the clinical applicability of the study findings.                                                                                                                                                                                           | Discussed in discussion Pg 12-15                                                                                                                                  |
